# Supplementary material for: H19, a Long Non-coding RNA, Mediates Transcription Factors and Target Genes through Interference of MicroRNAs in Pan-Cancer
Source: PubMed Central journal article supplement — Mol Ther Nucleic Acids. 2020 May 27;21:180–91. doi: 10.1016/j.omtn.2020.05.028 (PMC7321791; doi:10.1016/j.omtn.2020.05.028), 2020-05-27
Supplement: mmc1.pdf [file mmc1.pdf]

OMTN, Volume 21

## **Supplemental Information**

### **H19, a Long Non-coding RNA, Mediates Transcription Factors and Target Genes through Interference of MicroRNAs in Pan-Cancer**

**Aimin Li, Saurav Mallik, Haidan Luo, Peilin Jia, Dung-Fang Lee, and Zhongming Zhao**

## SUPPLEMENTARY FILES

**Figure S1.** H19 highly expressed across pan-cancer except for brain lower grade glioma (LGG), prostate adenocarcinoma (PRAD), and thyroid carcinoma (THCA).

**Figure S2.** TF-gene regulation was affected by H19 expression level.

**Table S1.** Number of samples and genes across the 24 cancer types based on TCGA data.

**Table S2.** Eighty-eight H19-TF-gene regulation triplets identified in at least two cancer types.

**Table S3.** 173 of 186 (93%) TF-gene pairs had direct or indirect evidence to support their relation to cancer (Table S3). The remaining 13 TF-gene pairs might be potential candidates for cancer research.

**Table S4.** The list of 29 H19 target miRNAs with evidence in literature.

**Table S5.** Regulation of 29 miRNAs in eight triplets. In the H19-ETS1-*TGFBR2* sheet, we list all the 29 miRNAs and their targets (TFs and genes). Some of the targets were predicted and then verified. In the H19-ETS1-*TGFBR2* table, TFs are marked in yellow if miRNAs target them, and genes are marked in red if miRNAs target them.

**Table S6.** Primers for qRT-PCR.

**Figure S1.** H19 highly expressed across pan-cancer except for brain lower grade glioma (LGG), prostate adenocarcinoma (PRAD), and thyroid carcinoma (THCA).

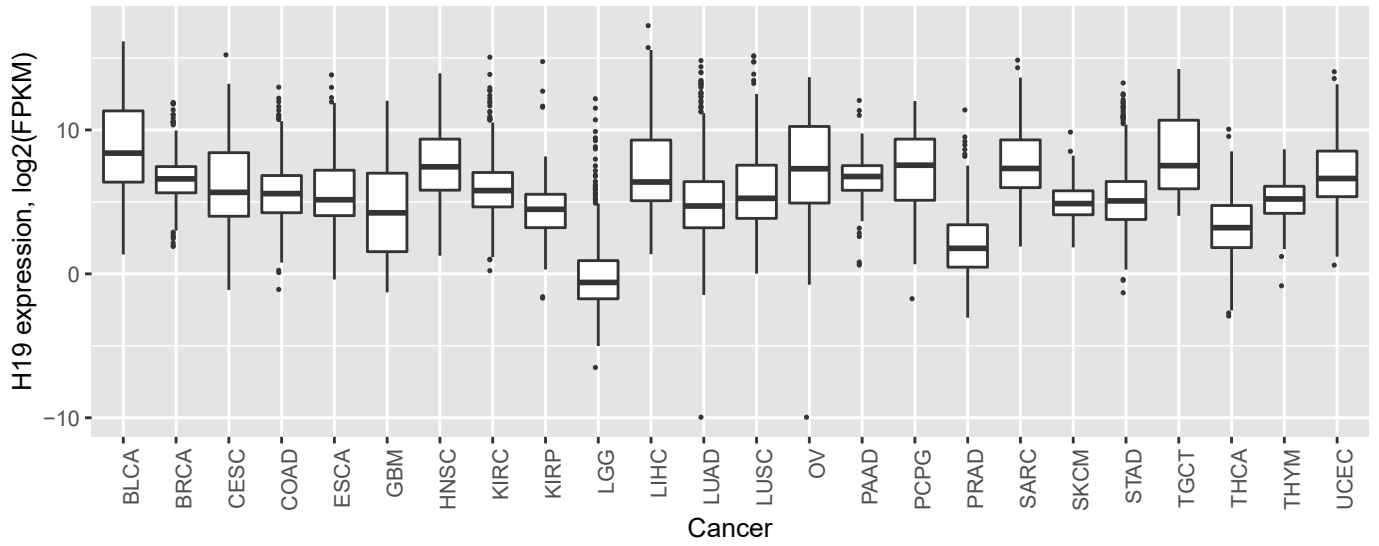

**Figure S2.** TF-gene regulation was affected by H19 expression level.

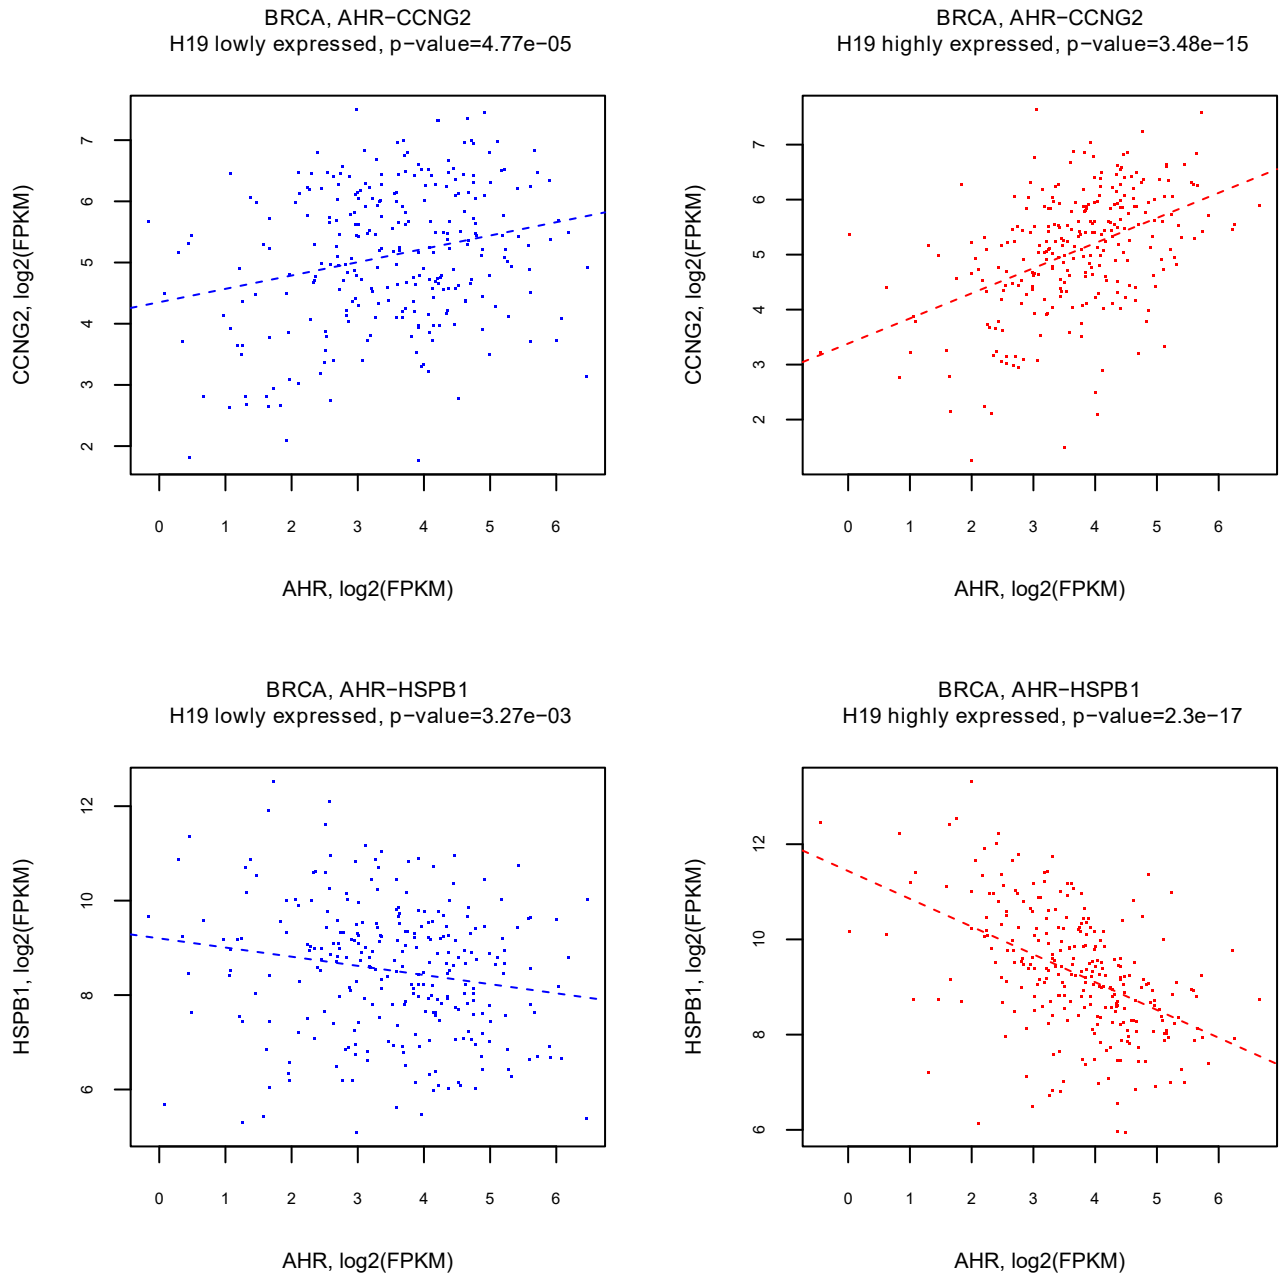

**BRCA, AHR-SOS1**  
H19 lowly expressed, p-value=6.07e-13

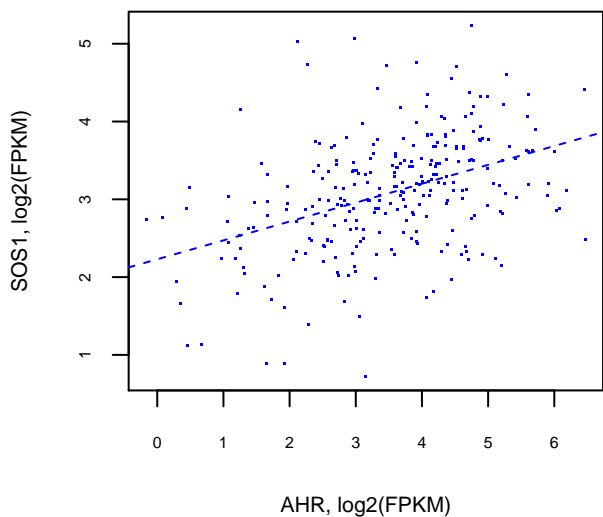

**BRCA, AHR-SOS1**  
H19 highly expressed, p-value=6.4e-25

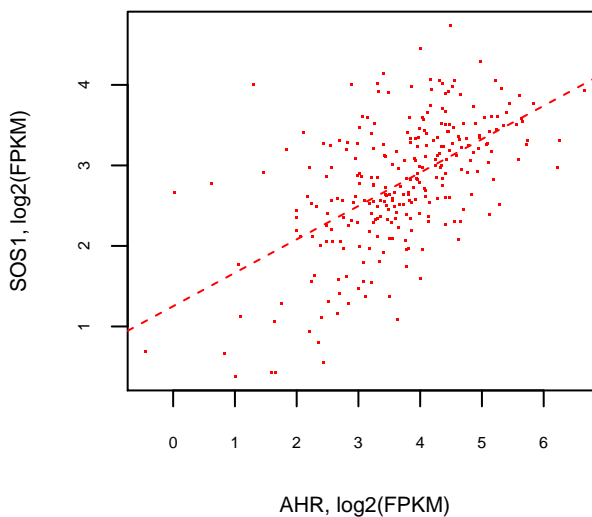

**BRCA, AIP-RSF1**  
H19 lowly expressed, p-value=5.21e-05

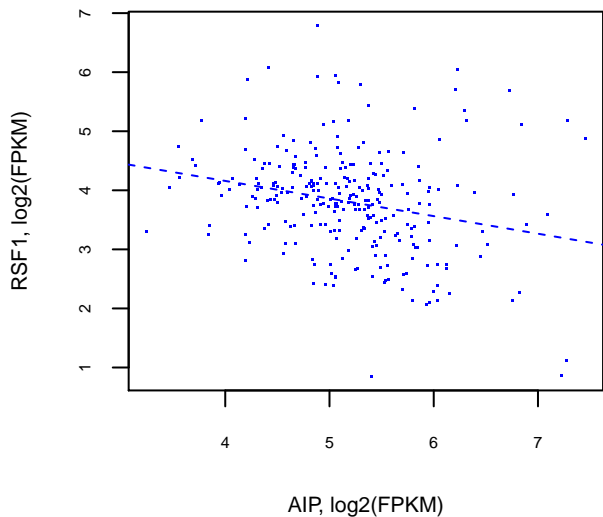

**BRCA, AIP-RSF1**  
H19 highly expressed, p-value=1.14e-12

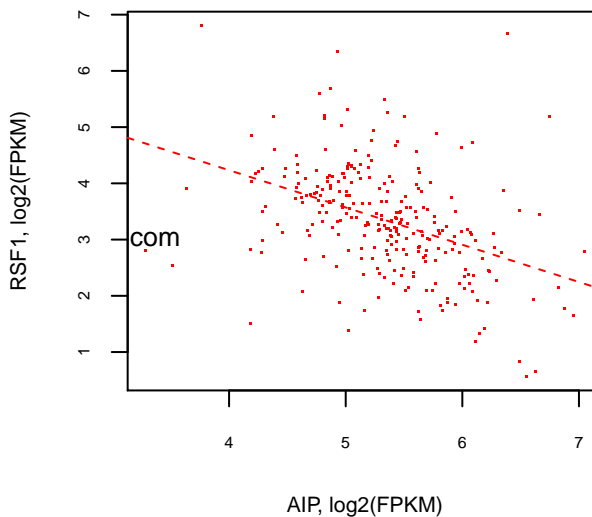

**BRCA, AKNA-CD40**  
H19 lowly expressed, p-value=2.53e-49

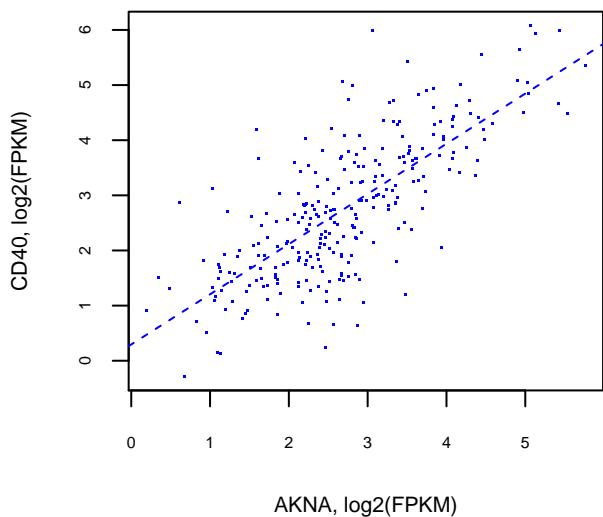

**BRCA, AKNA-CD40**  
H19 highly expressed, p-value=5.19e-37

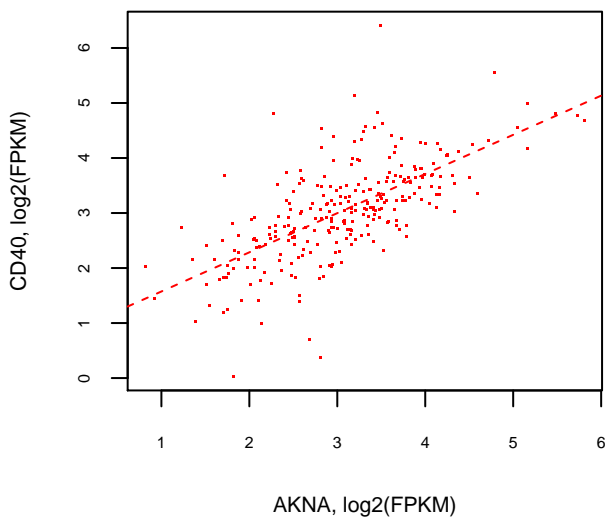

**BRCA, CIITA-HLA-DRA**  
H19 lowly expressed, p-value=1.4e-103

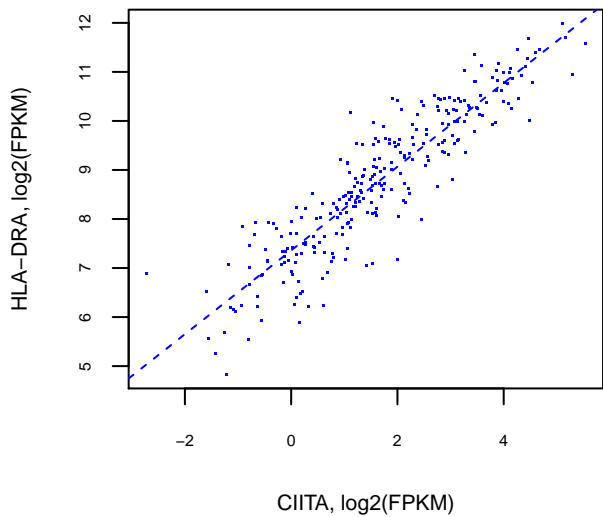

**BRCA, CIITA-HLA-DRA**  
H19 highly expressed, p-value=1.73e-62

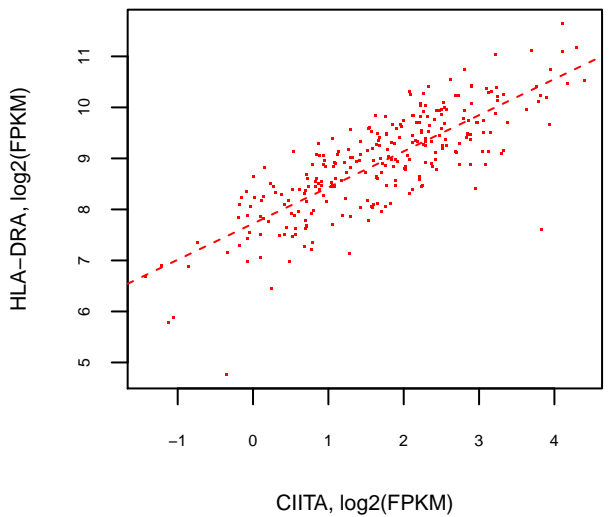

**BRCA, CREBBP-CREB1**  
H19 lowly expressed, p-value=1.72e-35

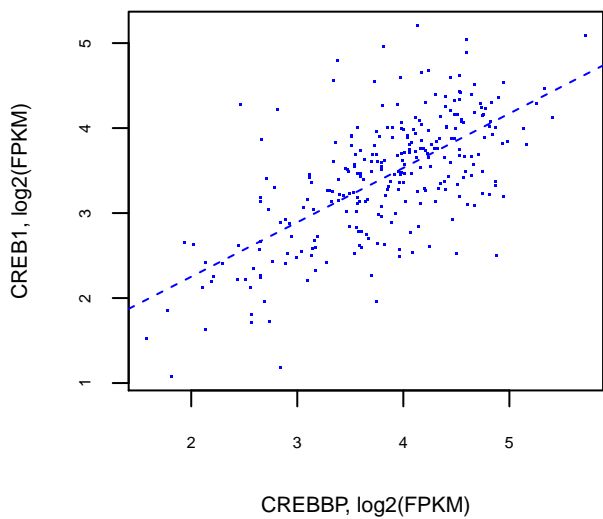

**BRCA, CREBBP-CREB1**  
H19 highly expressed, p-value=1.84e-58

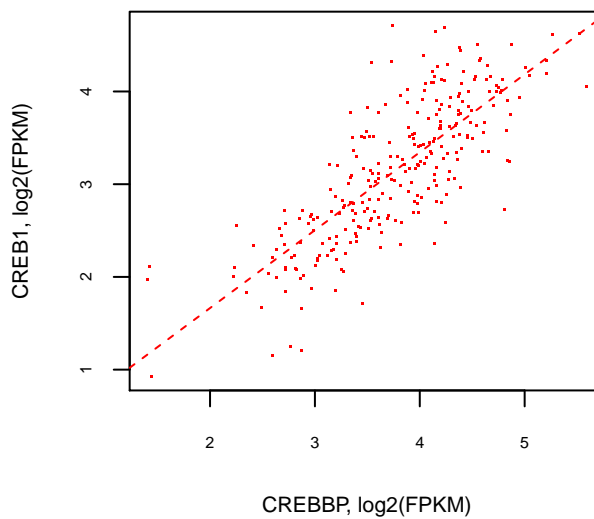

**BRCA, E2F1-GADD45B**  
H19 lowly expressed, p-value=2.67e-02

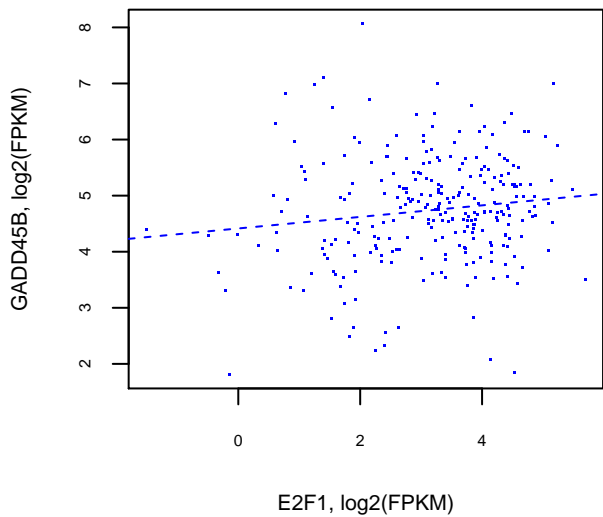

**BRCA, E2F1-GADD45B**  
H19 highly expressed, p-value=2.45e-05

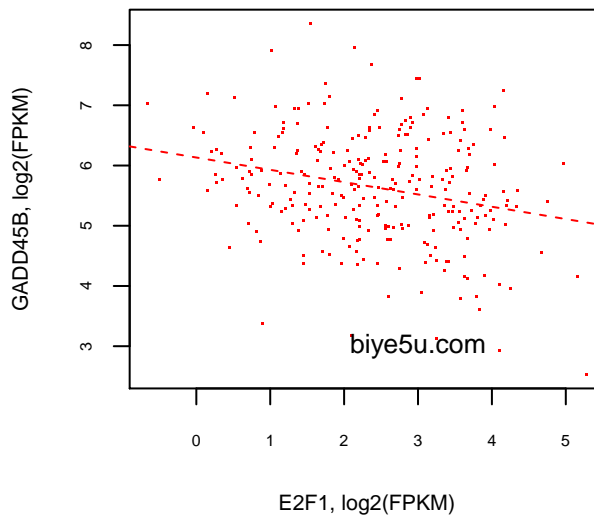

**BRCA, E2F3-MAPK8**  
H19 lowly expressed, p-value=1.88e-04

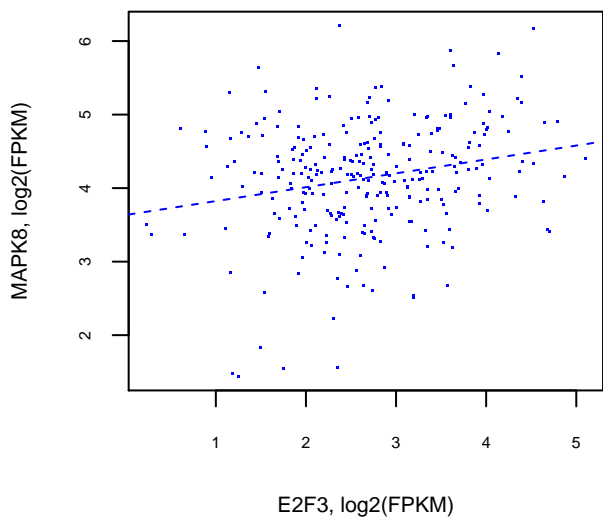

**BRCA, E2F3-MAPK8**  
H19 highly expressed, p-value=7.08e-18

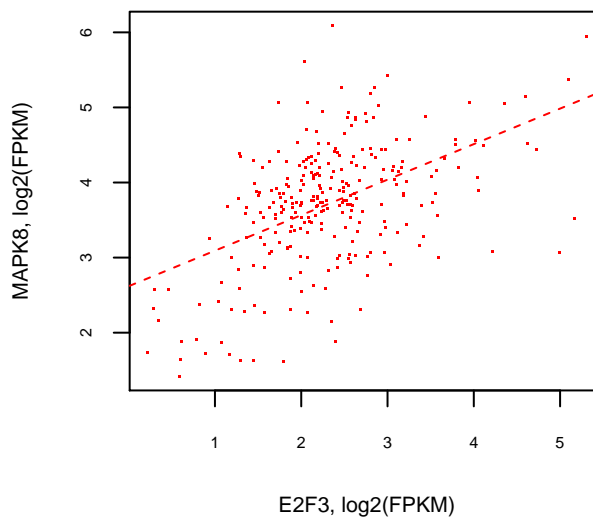

**BRCA, EGR1-SPRY1**  
H19 lowly expressed, p-value=1.81e-14

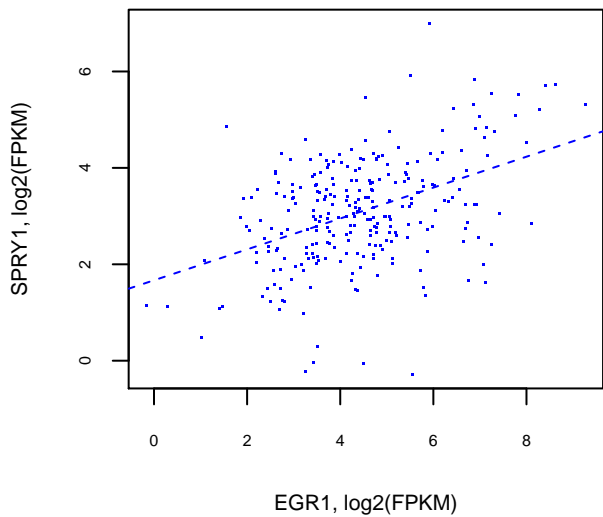

**BRCA, EGR1-SPRY1**  
H19 highly expressed, p-value=1.15e-35

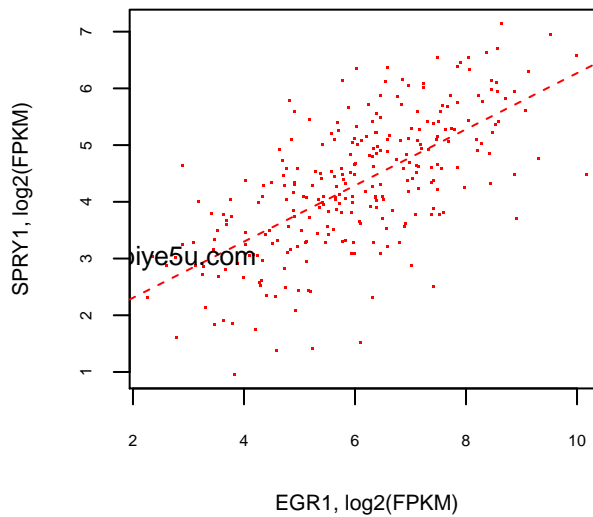



**BRCA, ETS1-TGFBR2**  
H19 lowly expressed, p-value=1.69e-31

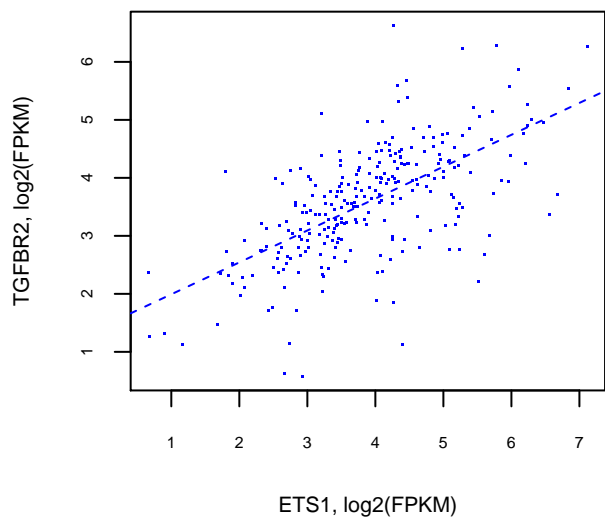

**BRCA, ETS1-TGFBR2**  
H19 highly expressed, p-value=2.09e-52

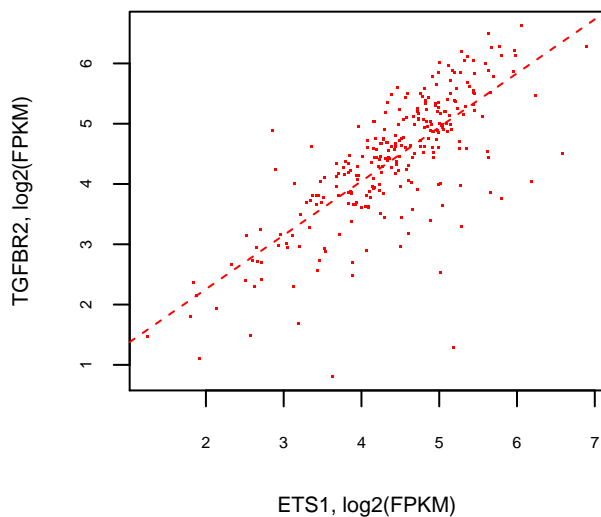

**BRCA, EZH2-BRCA1**  
H19 lowly expressed, p-value=4.6e-02

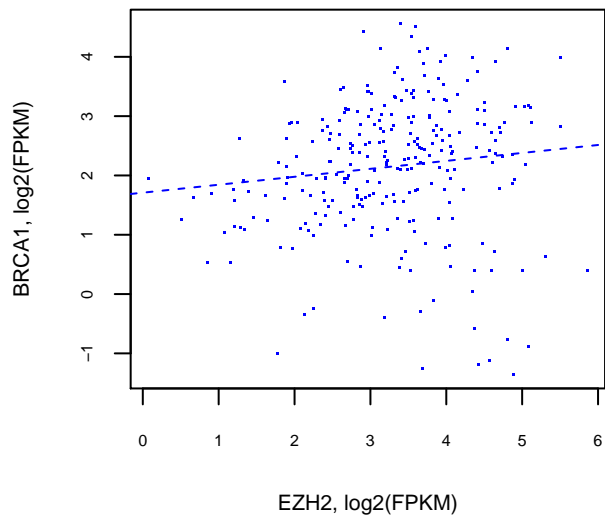

**BRCA, EZH2-BRCA1**  
H19 highly expressed, p-value=1.46e-15

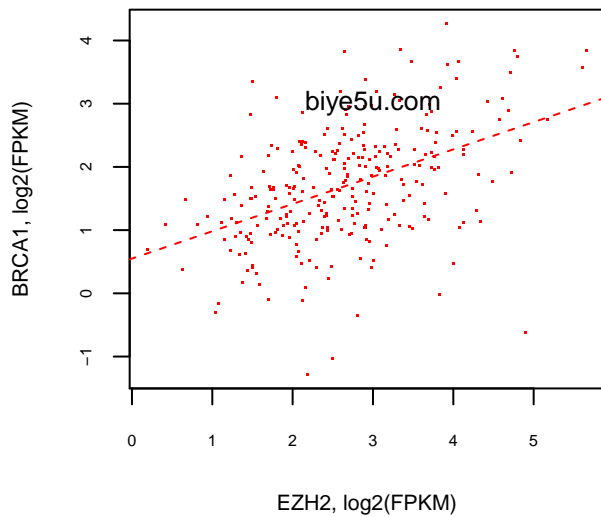

**BRCA, EZH2-DACT3**  
H19 lowly expressed, p-value=7.31e-02

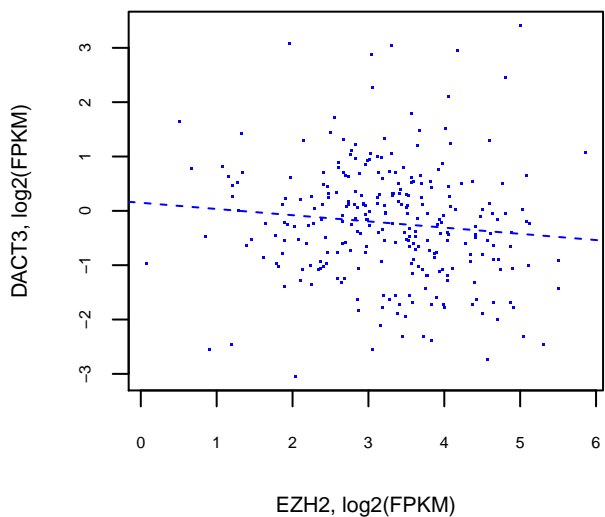

**BRCA, EZH2-DACT3**  
H19 highly expressed, p-value=1.4e-20

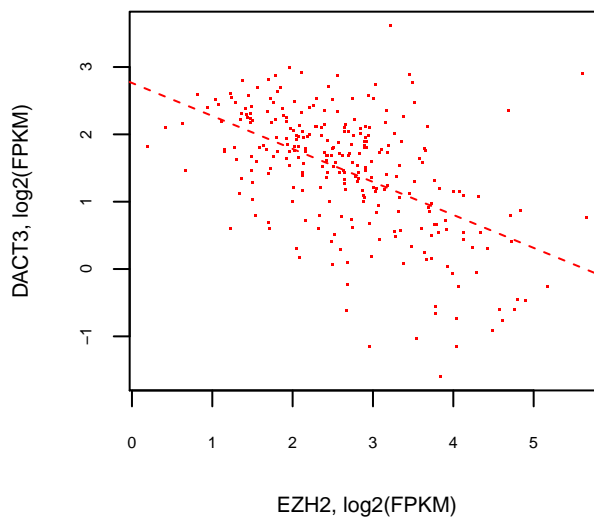

**BRCA, EZH2-SNAI2**  
H19 lowly expressed, p-value=8.49e-03

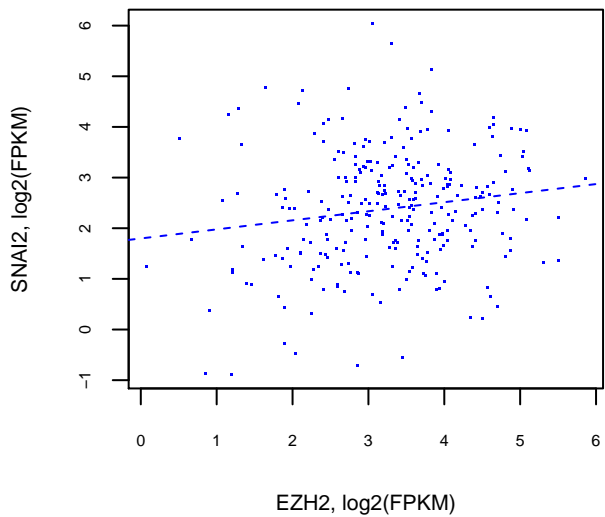

**BRCA, EZH2-SNAI2**  
H19 highly expressed, p-value=7.22e-05

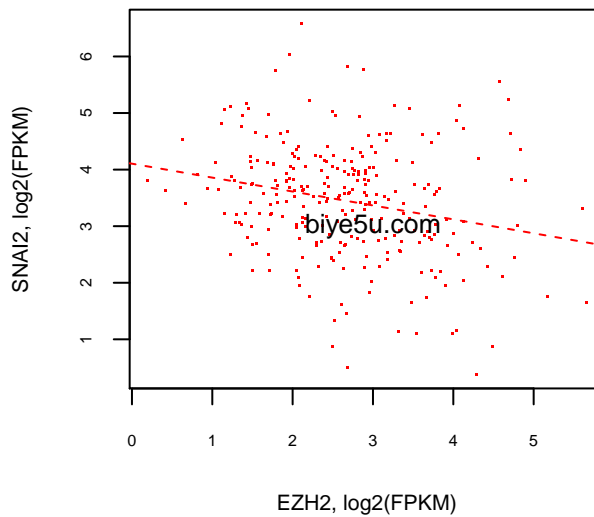

**BRCA, FLI1-CTGF**  
H19 lowly expressed, p-value=1.28e-06

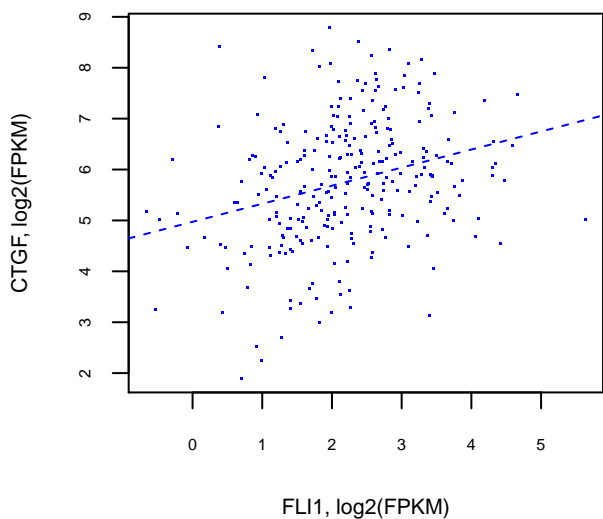

**BRCA, FLI1-CTGF**  
H19 highly expressed, p-value=2.66e-15

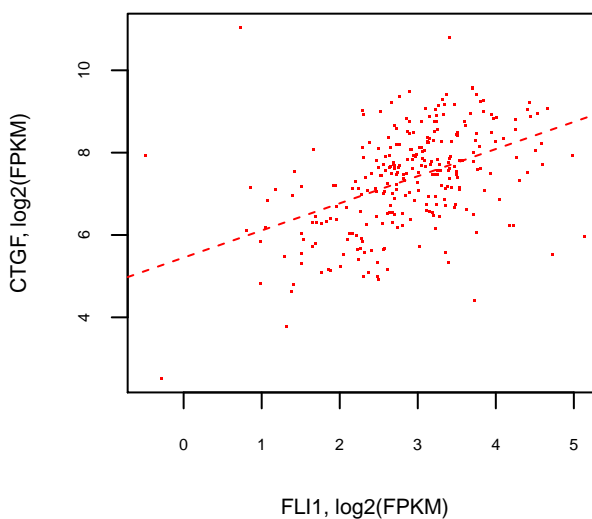

**BRCA, FLI1-TGFBR2**  
H19 lowly expressed, p-value=4.53e-58

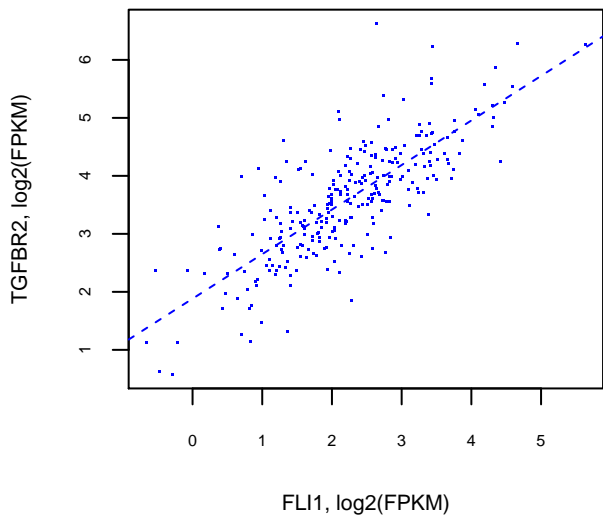

**BRCA, FLI1-TGFBR2**  
H19 highly expressed, p-value=8.37e-70

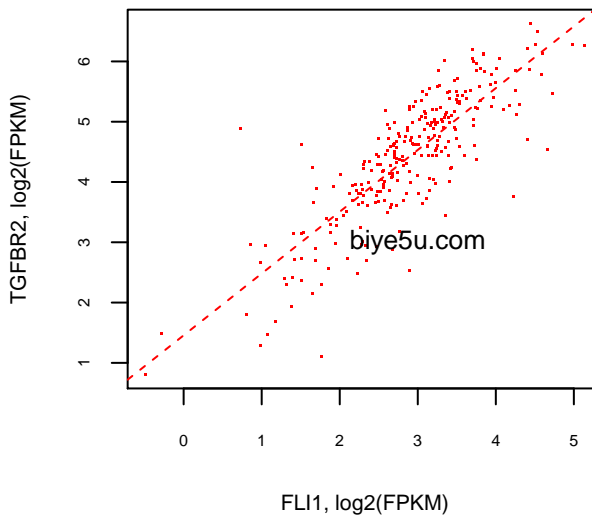

**BRCA, FOSL2-BCL6**  
H19 lowly expressed, p-value=4.04e-03

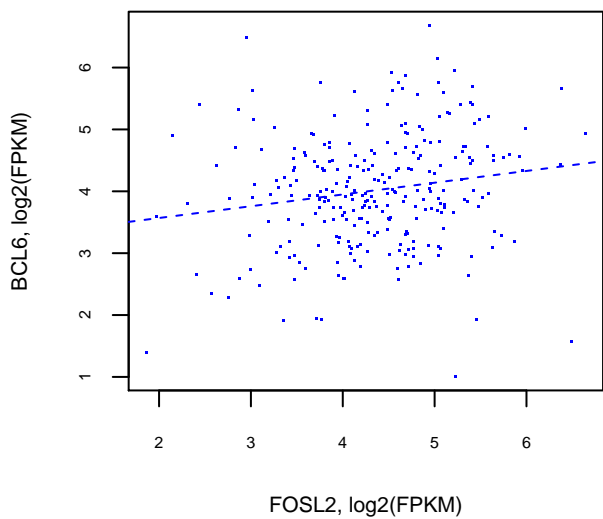

**BRCA, FOSL2-BCL6**  
H19 highly expressed, p-value=4.33e-12

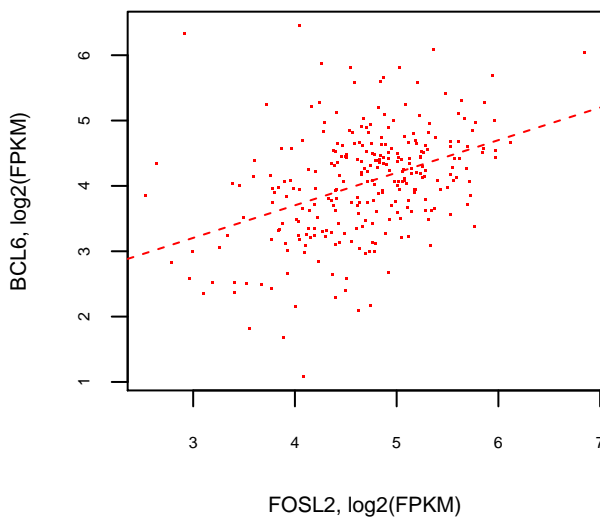

**BRCA, FOXO1-TXNIP**  
H19 lowly expressed, p-value=1.27e-07

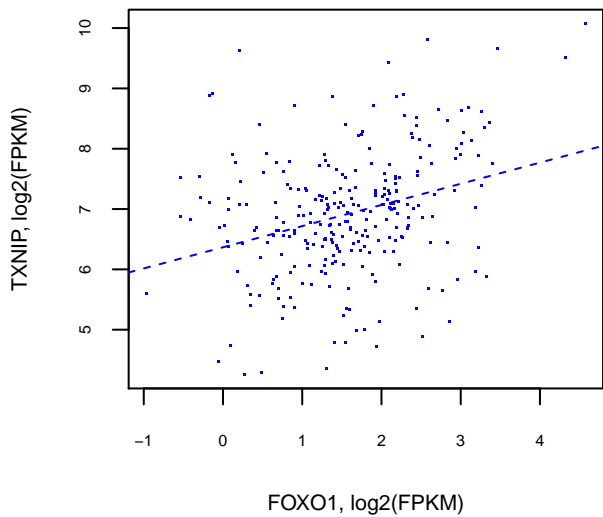

**BRCA, FOXO1-TXNIP**  
H19 highly expressed, p-value=8.73e-23

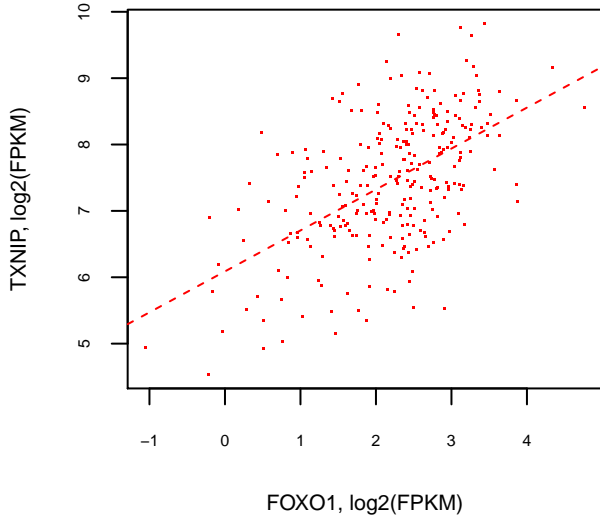

**BRCA, GATA2-VCAM1**  
H19 lowly expressed, p-value=5.08e-02

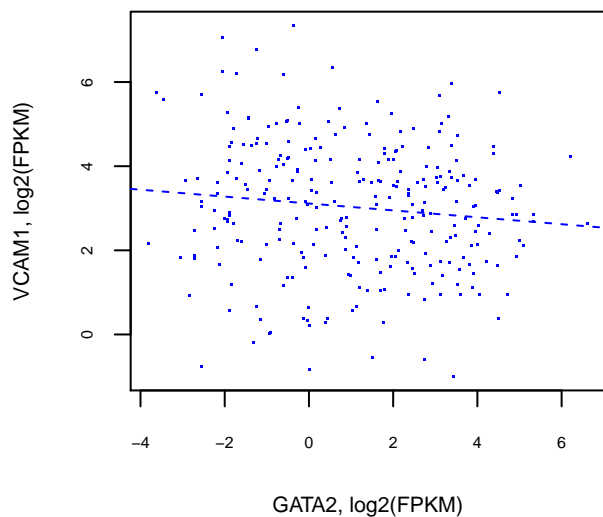

**BRCA, GATA2-VCAM1**  
H19 highly expressed, p-value=7.39e-03

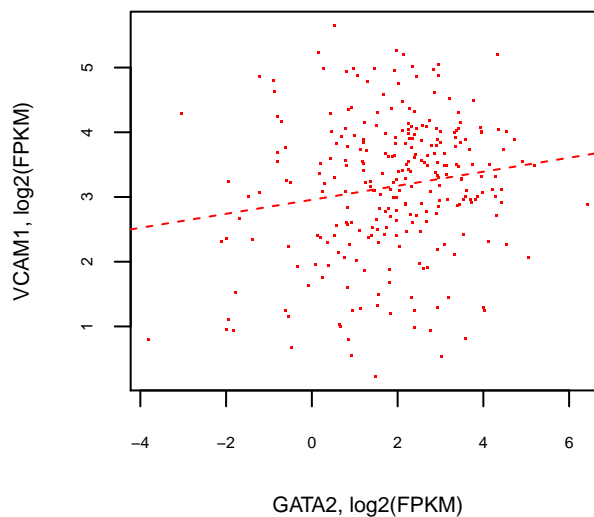

**BRCA, GATA2-VWF**  
H19 lowly expressed, p-value=4.84e-07

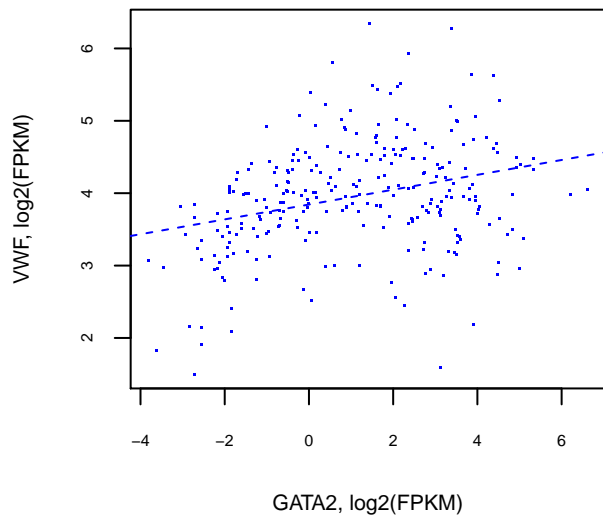

**BRCA, GATA2-VWF**  
H19 highly expressed, p-value=1.21e-10

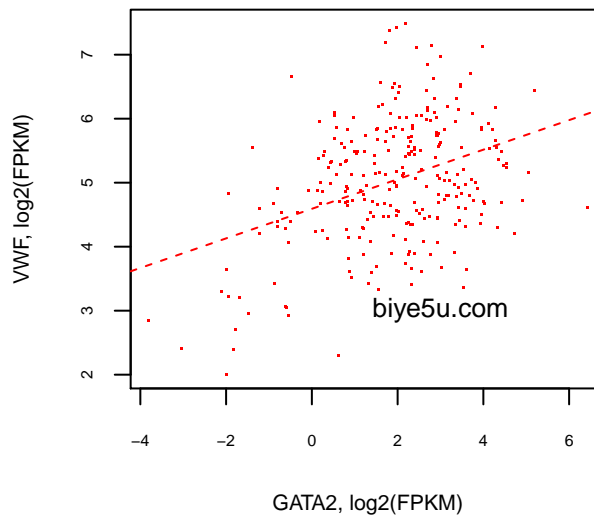

**BRCA, HDAC1-TXNIP**  
H19 lowly expressed, p-value=1.36e-04

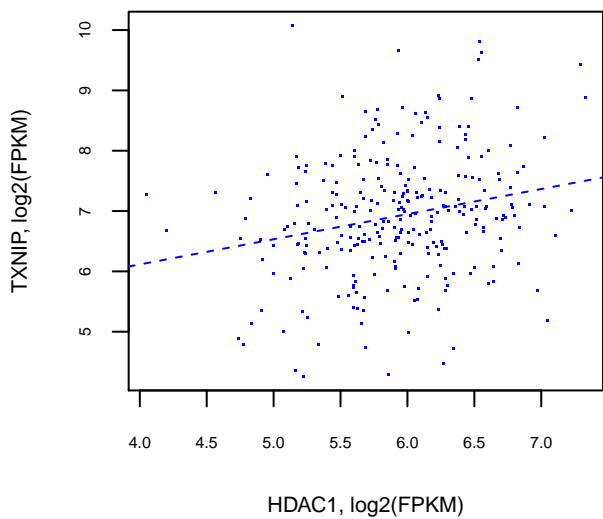

**BRCA, HDAC1-TXNIP**  
H19 highly expressed, p-value=2.64e-02

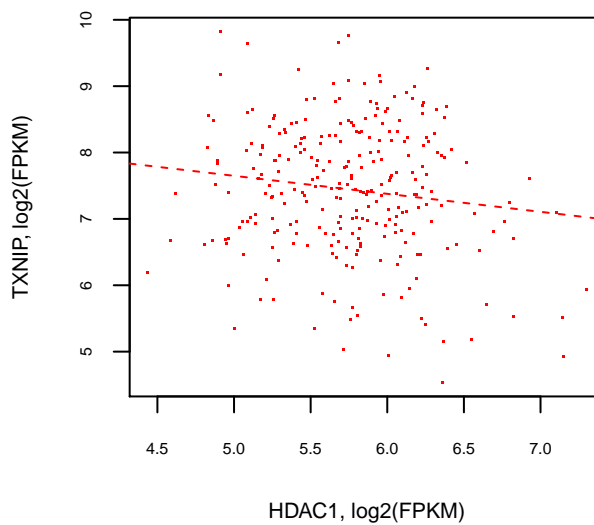

**BRCA, HDAC2-TWIST1**  
H19 lowly expressed, p-value=5.33e-02

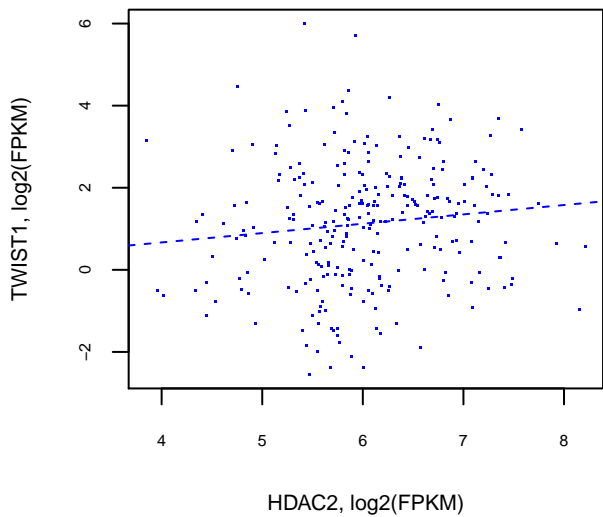

**BRCA, HDAC2-TWIST1**  
H19 highly expressed, p-value=1.85e-02

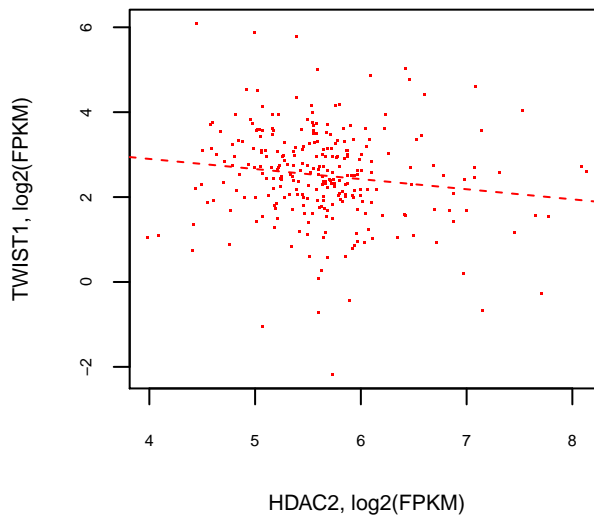

**BRCA, HDGF-FAS**  
H19 lowly expressed, p-value=9.91e-03

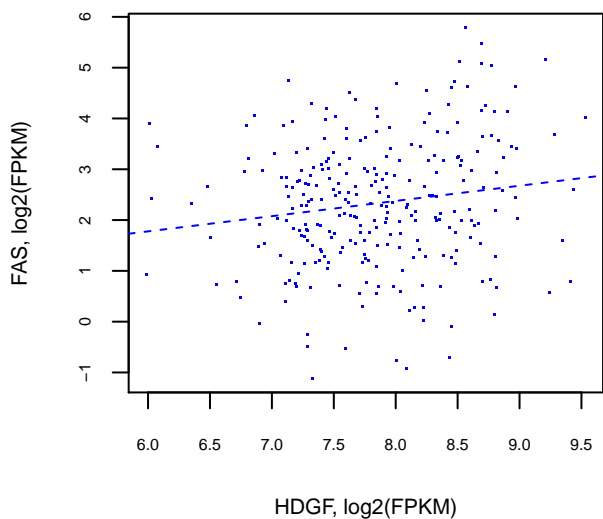

**BRCA, HDGF-FAS**  
H19 highly expressed, p-value=4e-05

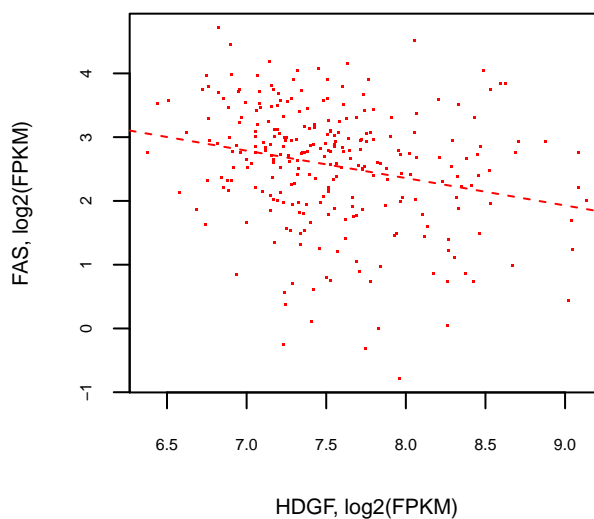

**BRCA, IKZF1-BIRC5**  
H19 lowly expressed, p-value=8.57e-04

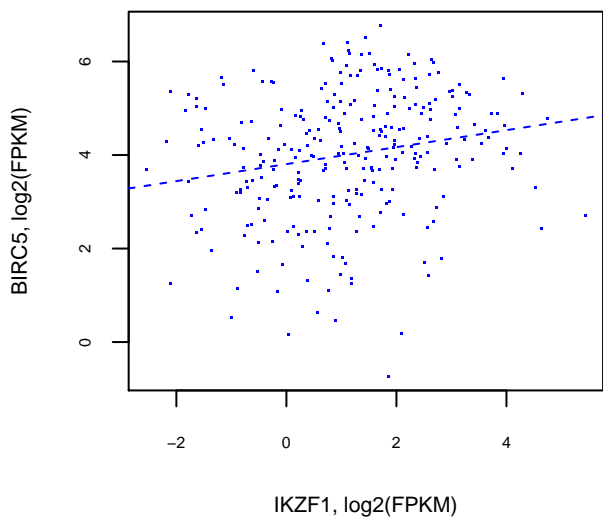

**BRCA, IKZF1-BIRC5**  
H19 highly expressed, p-value=5.21e-03

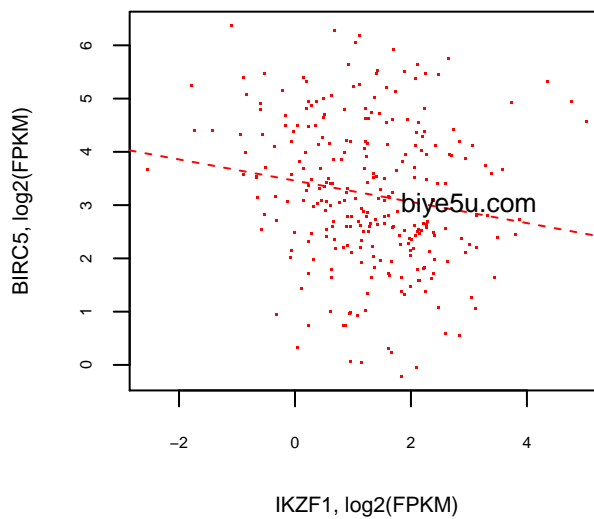

**BRCA, KAT2B-SMAD4**  
H19 lowly expressed, p-value=2.47e-08

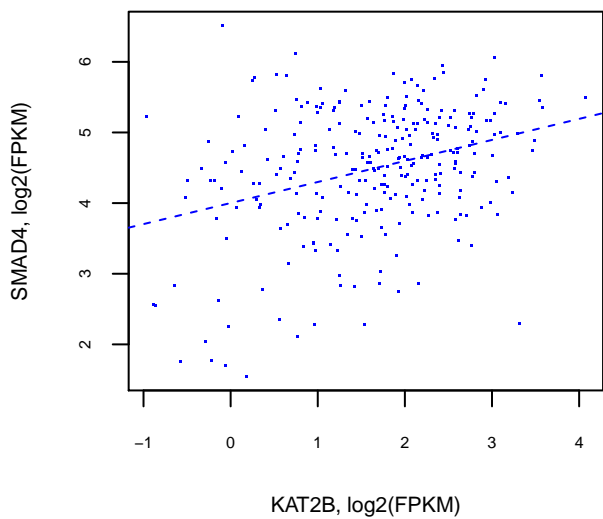

**BRCA, KAT2B-SMAD4**  
H19 highly expressed, p-value=4.89e-21

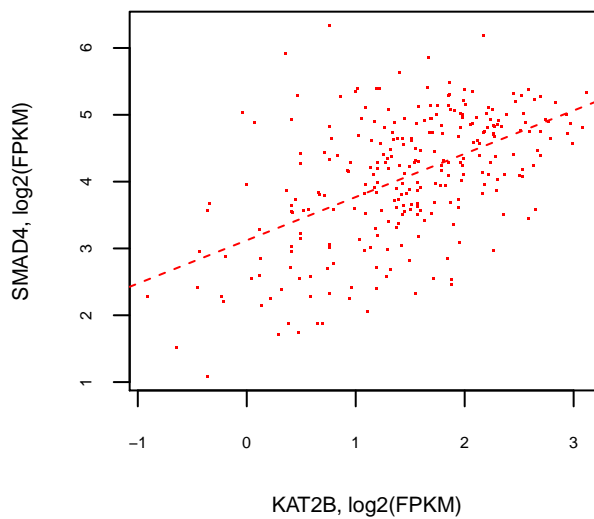

**BRCA, KAT2B-ZEB1**  
H19 lowly expressed, p-value=2.12e-17

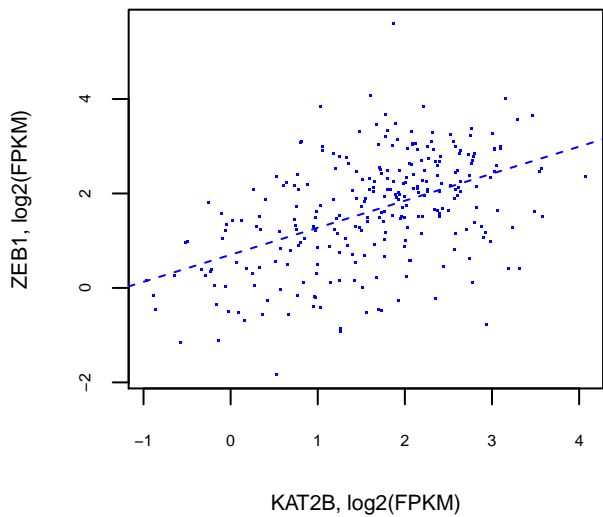

**BRCA, KAT2B-ZEB1**  
H19 highly expressed, p-value=2.62e-27

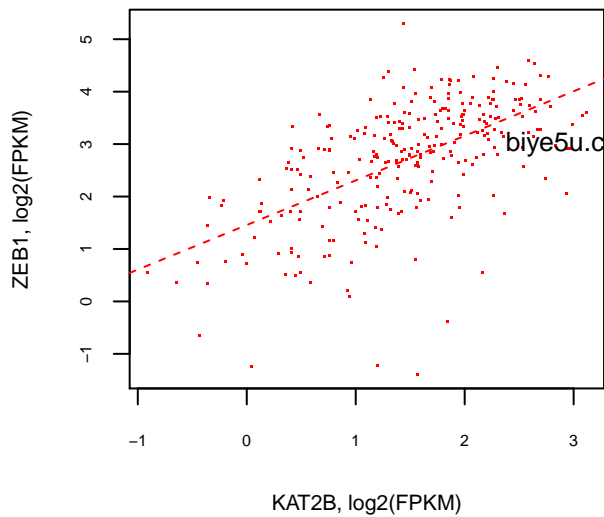



**BRCA, KLF4-IL6**  
H19 lowly expressed, p-value=3.98e-05

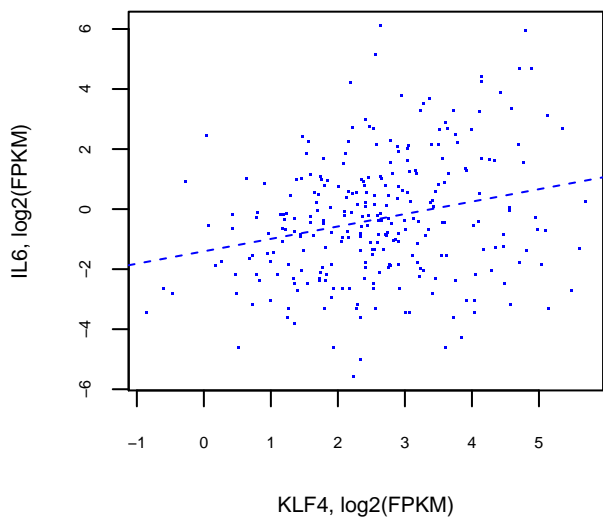

**BRCA, KLF4-IL6**  
H19 highly expressed, p-value=4.75e-21

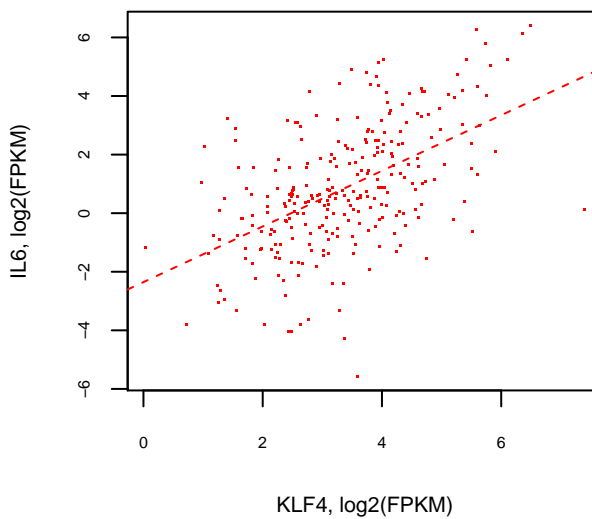

**BRCA, KLF6-TXNIP**  
H19 lowly expressed, p-value=6.11e-03

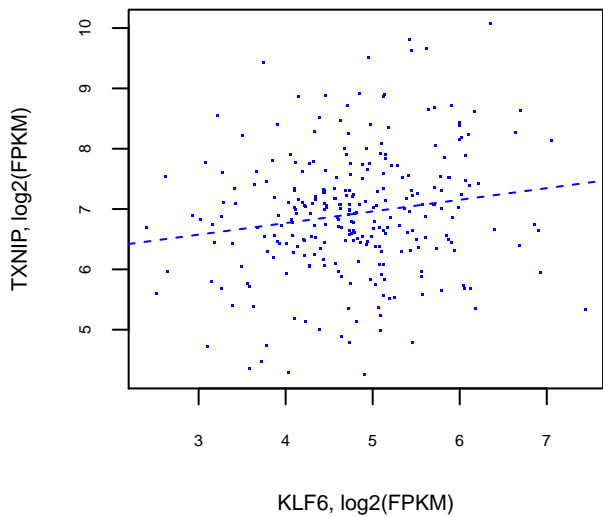

**BRCA, KLF6-TXNIP**  
H19 highly expressed, p-value=1.77e-14

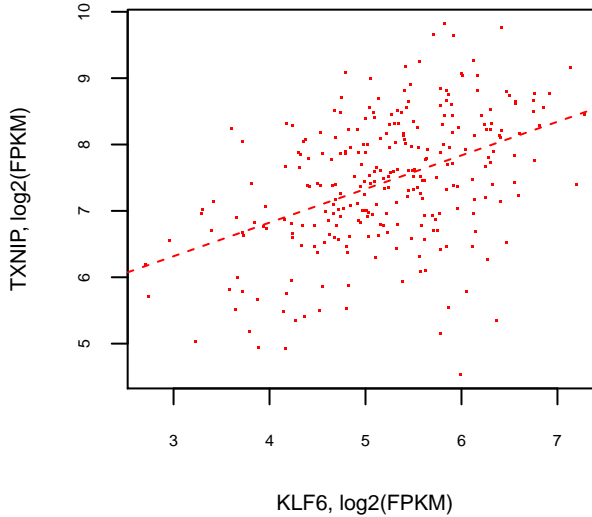

**BRCA, MYBL2-COL1A1**  
H19 lowly expressed, p-value=3.31e-03

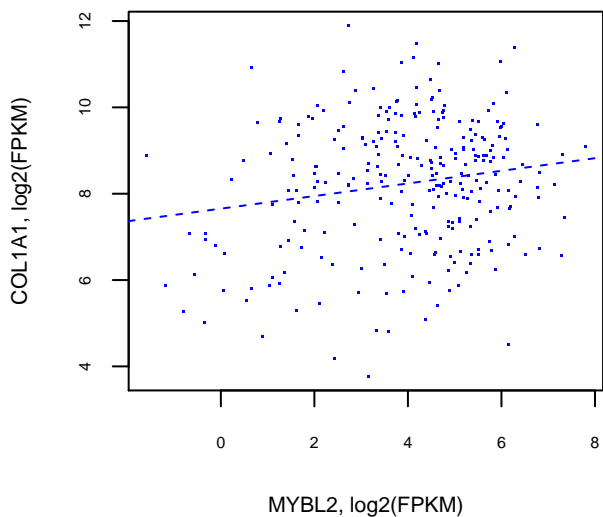

**BRCA, MYBL2-COL1A1**  
H19 highly expressed, p-value=2.74e-10

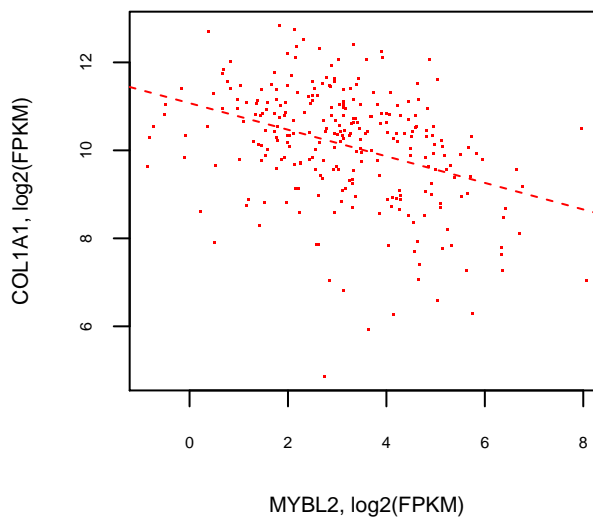

**BRCA, NFKB1-CHUK**  
H19 lowly expressed, p-value=6.26e-05

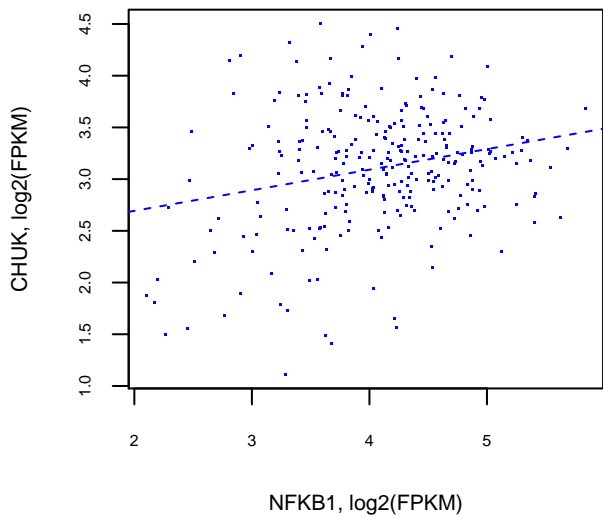

**BRCA, NFKB1-CHUK**  
H19 highly expressed, p-value=4.84e-18

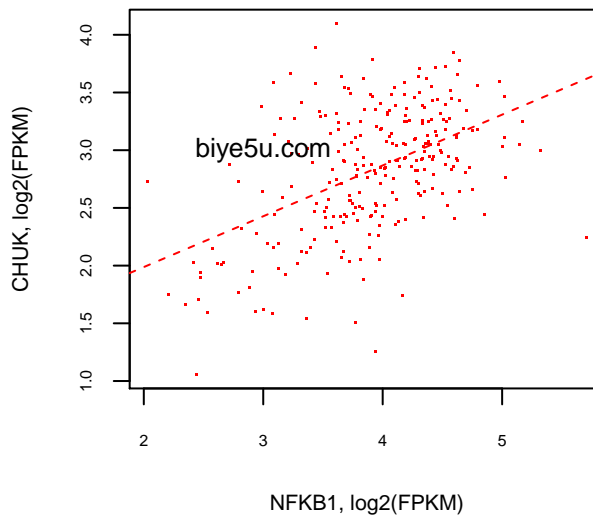

**BRCA, NFKB1-MIF**  
H19 lowly expressed, p-value=4.42e-05

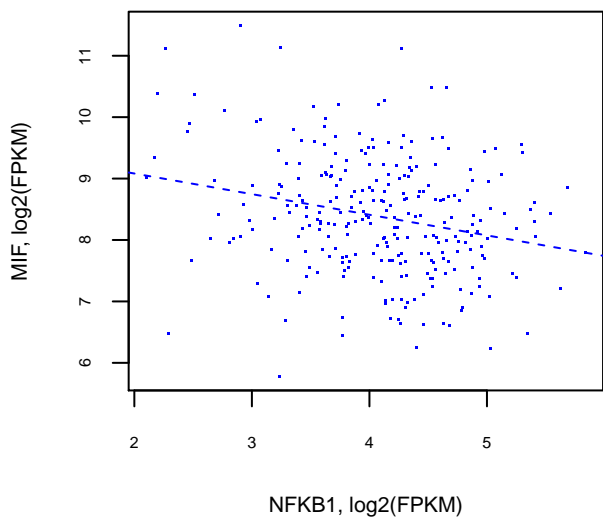

**BRCA, NFKB1-MIF**  
H19 highly expressed, p-value=8.42e-13

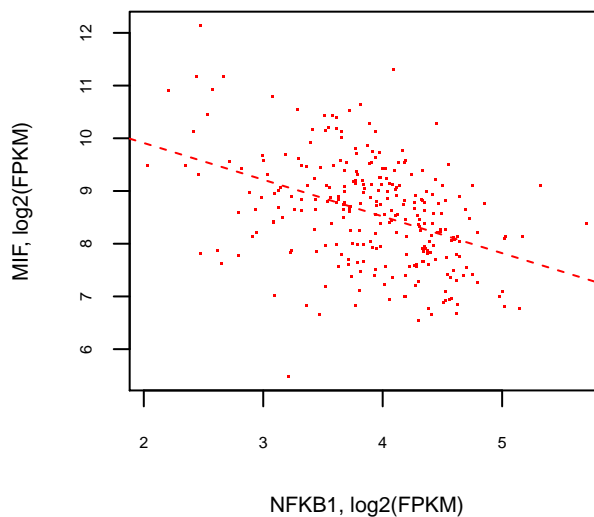

**BRCA, NFYB-EDF1**  
H19 lowly expressed, p-value=5.55e-06

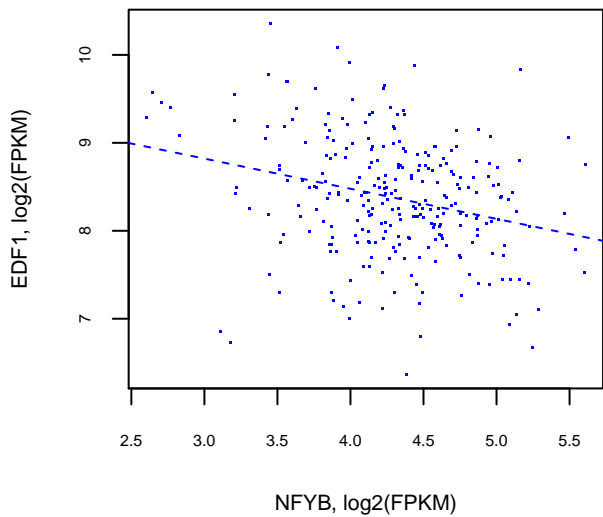

**BRCA, NFYB-EDF1**  
H19 highly expressed, p-value=4.49e-21

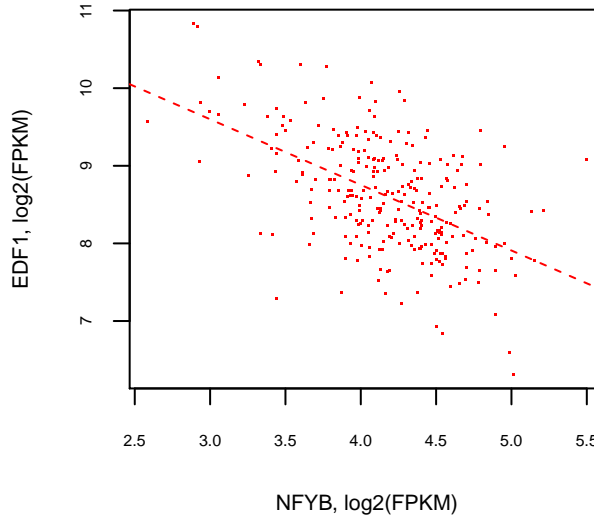

**BRCA, NFYB-HMGCS1**  
H19 lowly expressed, p-value=1.39e-03

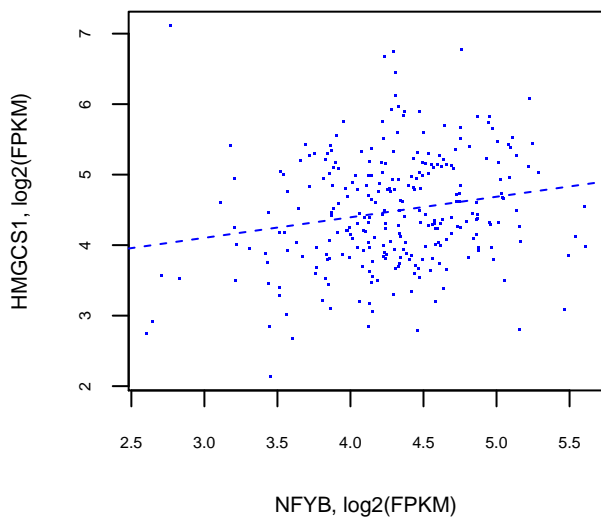

**BRCA, NFYB-HMGCS1**  
H19 highly expressed, p-value=4.1e-11

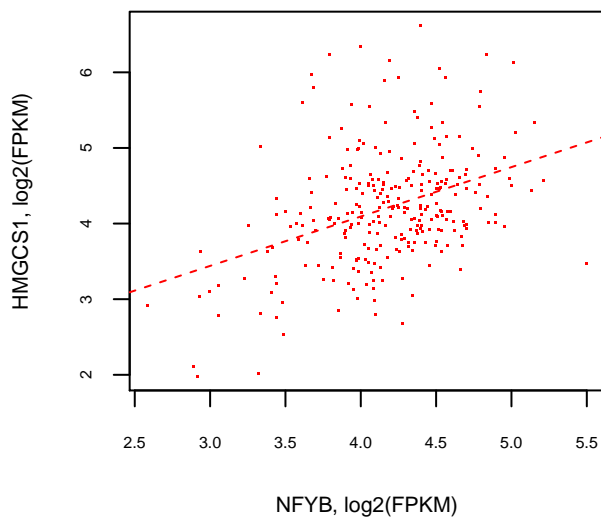

**BRCA, NFYB-SP3**  
H19 lowly expressed, p-value=1.45e-09

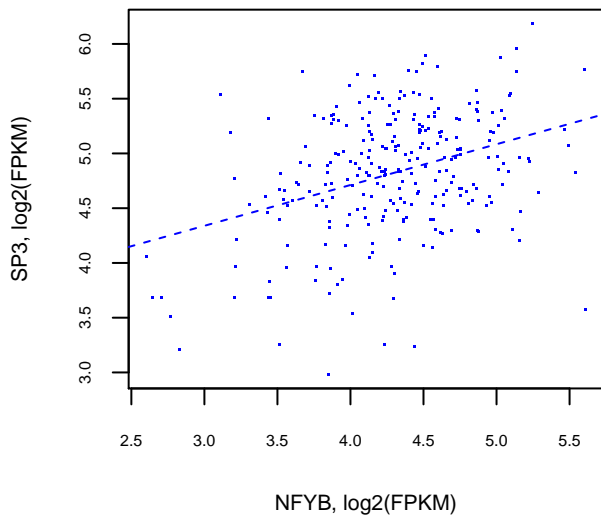

**BRCA, NFYB-SP3**  
H19 highly expressed, p-value=3.48e-30

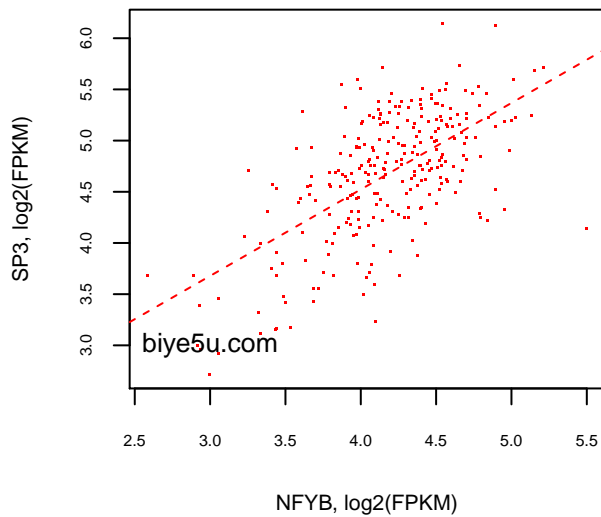

**BRCA, NR3C1-CALD1**  
H19 lowly expressed, p-value=1.01e-02

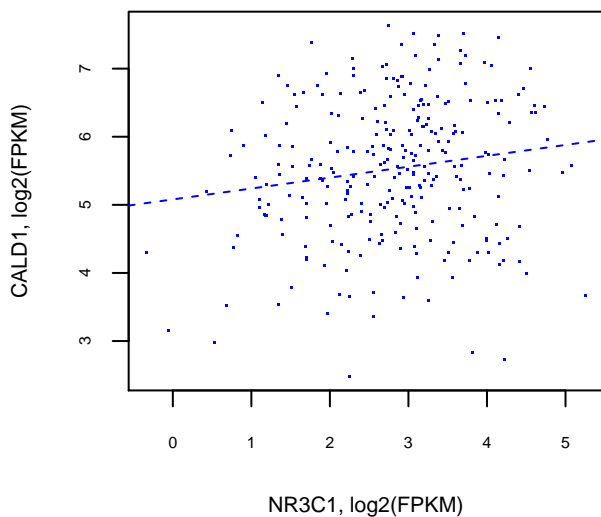

**BRCA, NR3C1-CALD1**  
H19 highly expressed, p-value=4.54e-19

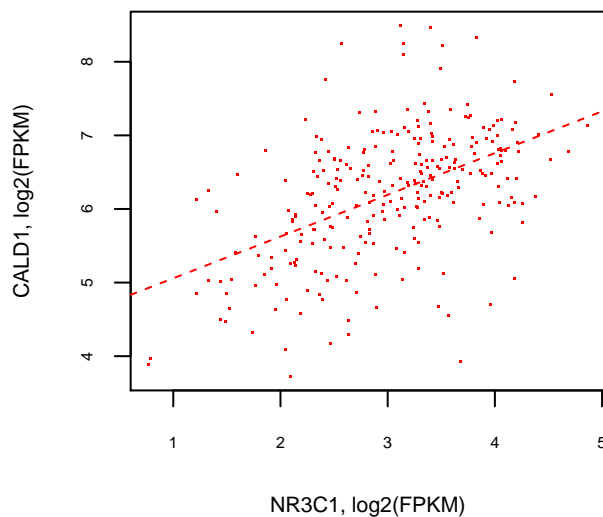

**BRCA, PARP1-FBN1**  
H19 lowly expressed, p-value=3.92e-02

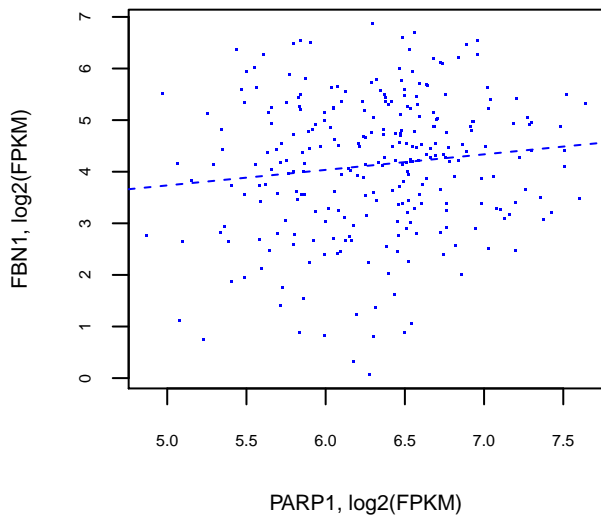

**BRCA, PARP1-FBN1**  
H19 highly expressed, p-value=3.94e-02

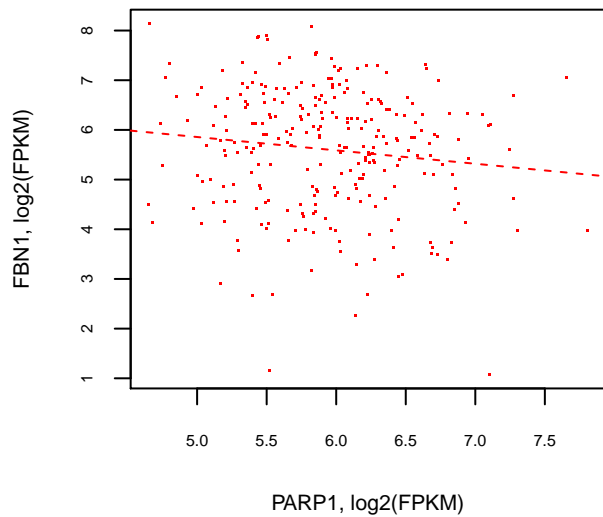

**BRCA, PARP1-FN1**  
H19 lowly expressed, p-value=4.25e-02

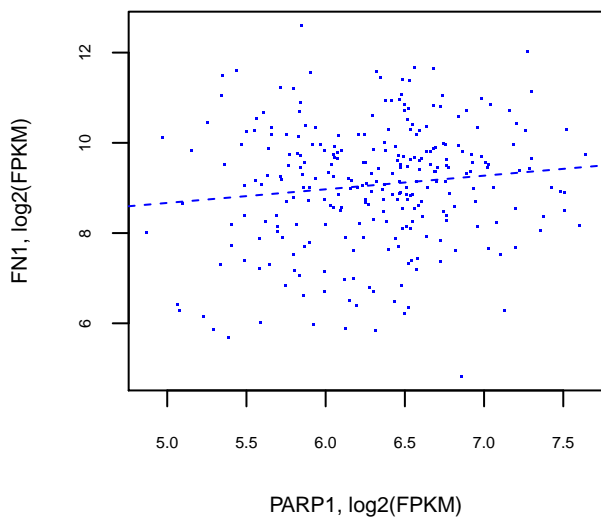

**BRCA, PARP1-FN1**  
H19 highly expressed, p-value=2.29e-03

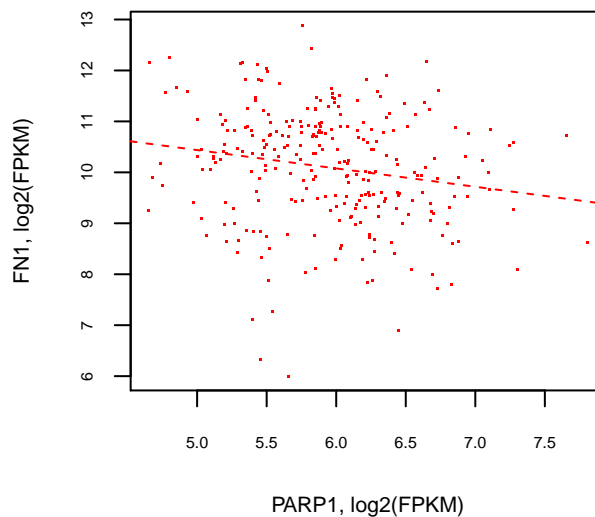

**BRCA, POU2AF1-TK1**  
H19 lowly expressed, p-value=2.88e-04

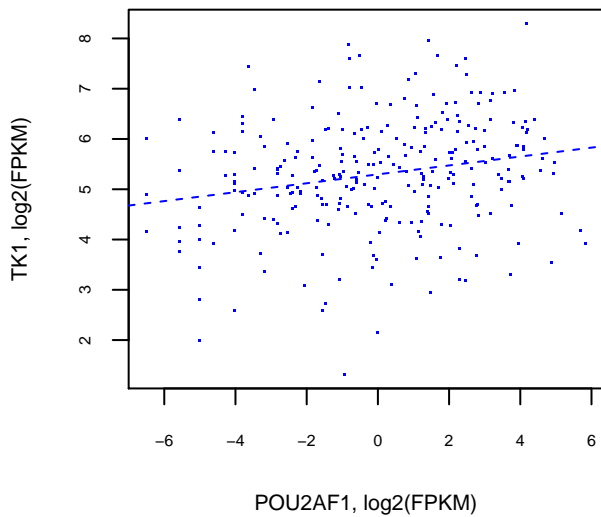

**BRCA, POU2AF1-TK1**  
H19 highly expressed, p-value=2.1e-03

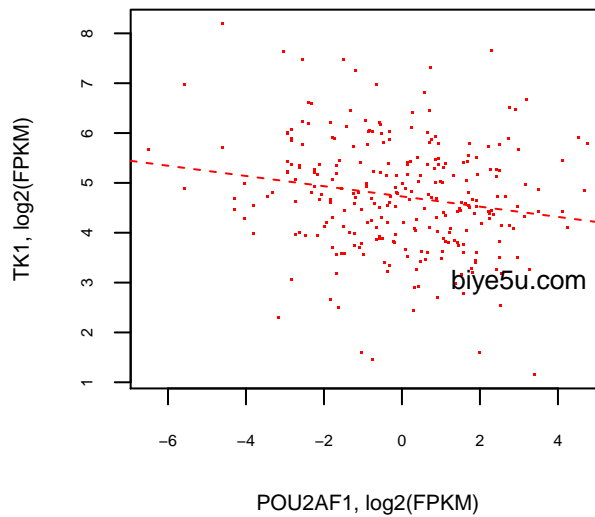

**BRCA, PPARA-KLF11**  
H19 lowly expressed, p-value=6.81e-15

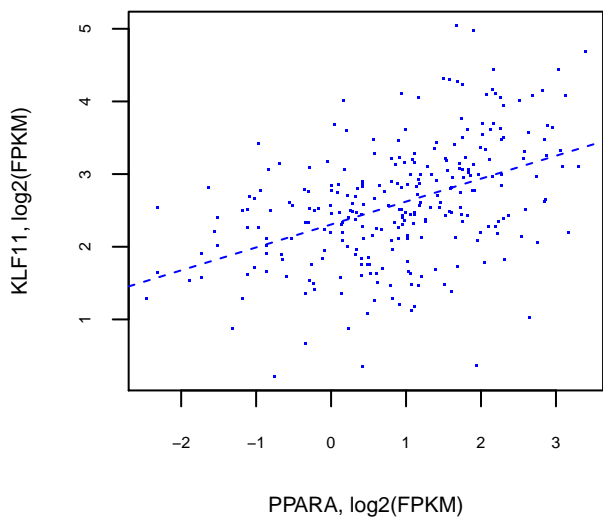

**BRCA, PPARA-KLF11**  
H19 highly expressed, p-value=5.66e-38

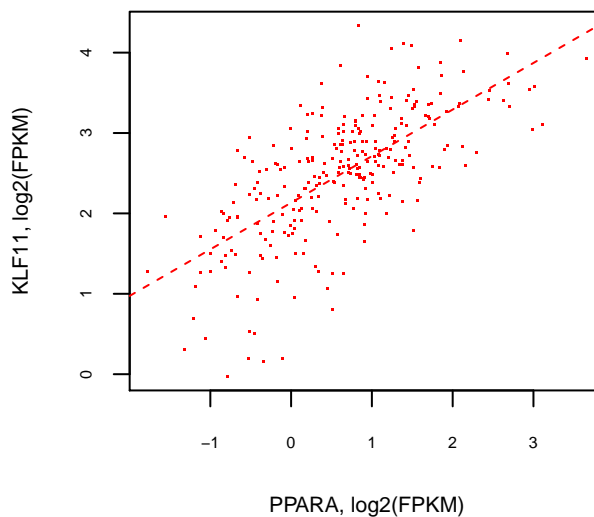

**BRCA, RB1-WRN**  
H19 lowly expressed, p-value=3.09e-05

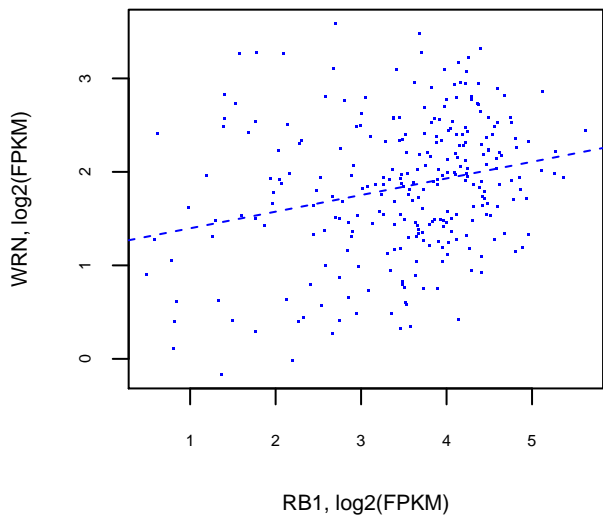

**BRCA, RB1-WRN**  
H19 highly expressed, p-value=9.54e-15

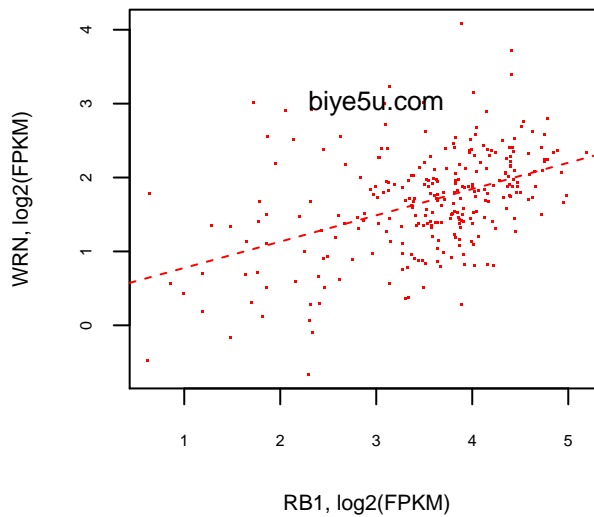

**BRCA, RUNX2-MMP2**  
H19 lowly expressed, p-value=1.54e-26

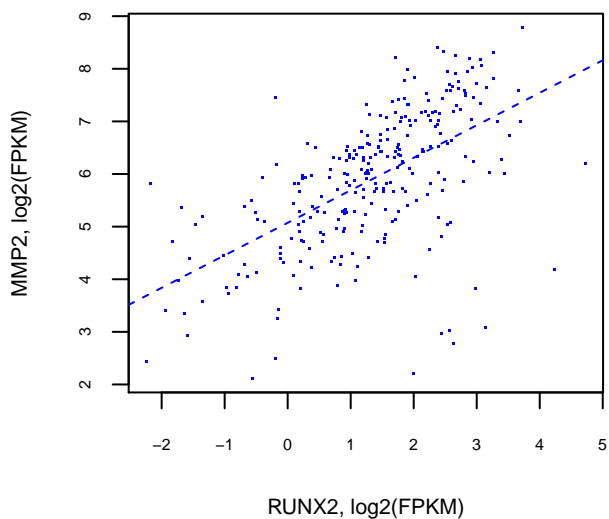

**BRCA, RUNX2-MMP2**  
H19 highly expressed, p-value=1.18e-52

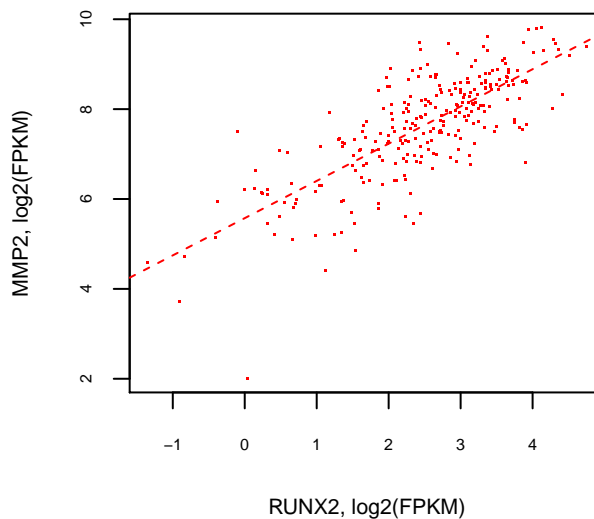

**BRCA, SNAI2-MET**  
H19 lowly expressed, p-value=1.32e-12

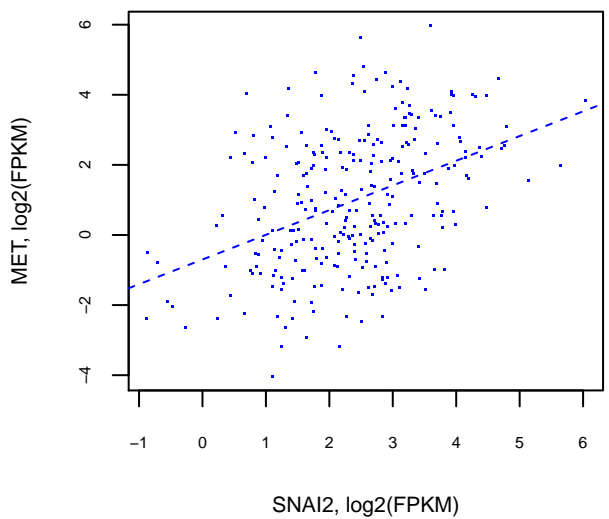

**BRCA, SNAI2-MET**  
H19 highly expressed, p-value=3.98e-05

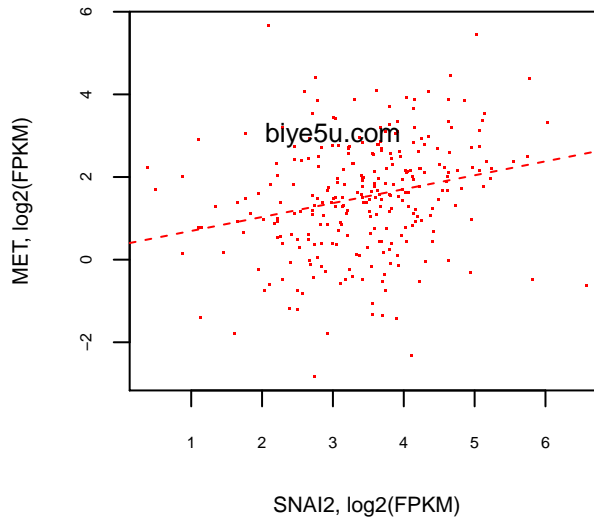



**BRCA, SOX18-CLDN5**  
H19 lowly expressed, p-value=2.38e-16

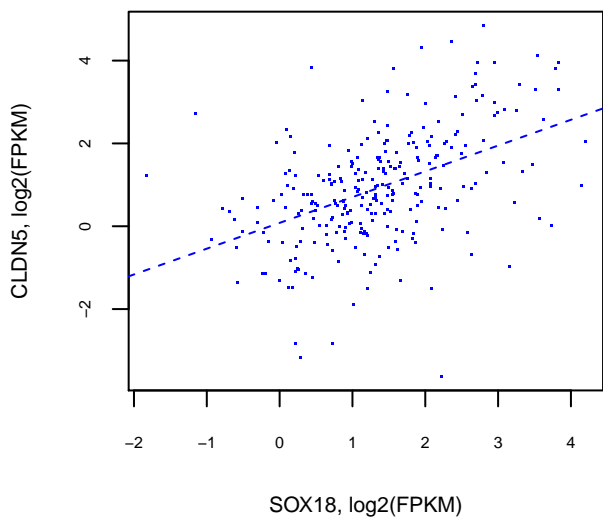

**BRCA, SOX18-CLDN5**  
H19 highly expressed, p-value=3.05e-59

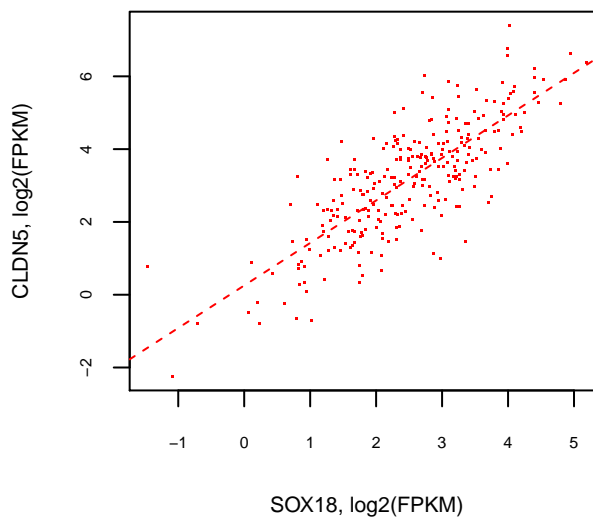

**BRCA, SP1-ADAM17**  
H19 lowly expressed, p-value=2.81e-09

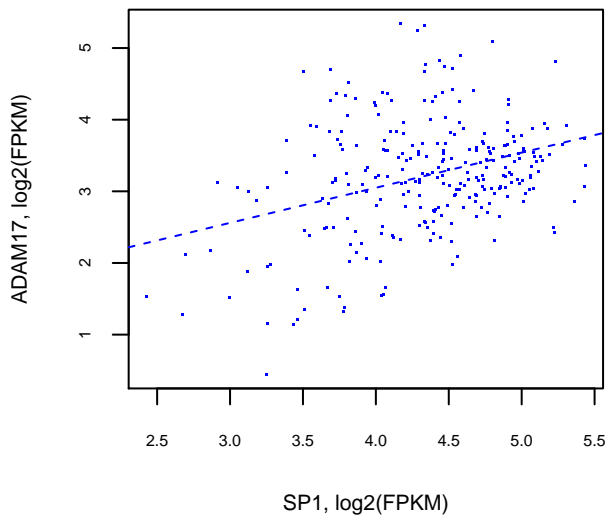

**BRCA, SP1-ADAM17**  
H19 highly expressed, p-value=5.76e-27

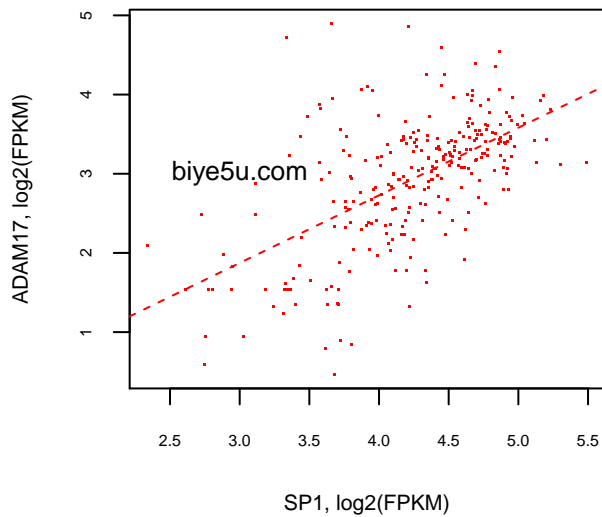

**BRCA, SP1-ATM**  
H19 lowly expressed, p-value=1.56e-18

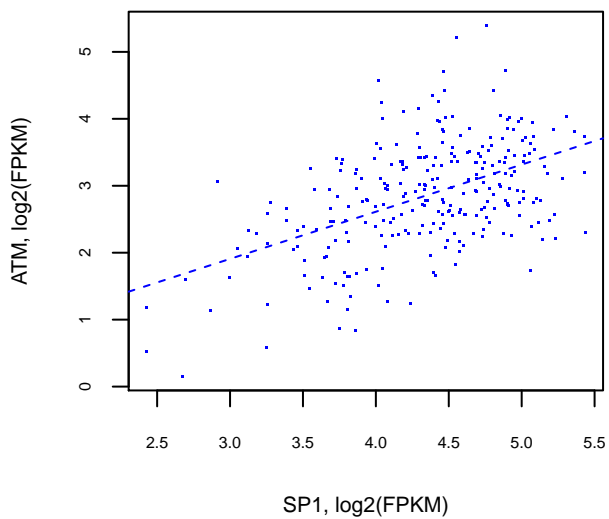

**BRCA, SP1-ATM**  
H19 highly expressed, p-value=1.96e-34

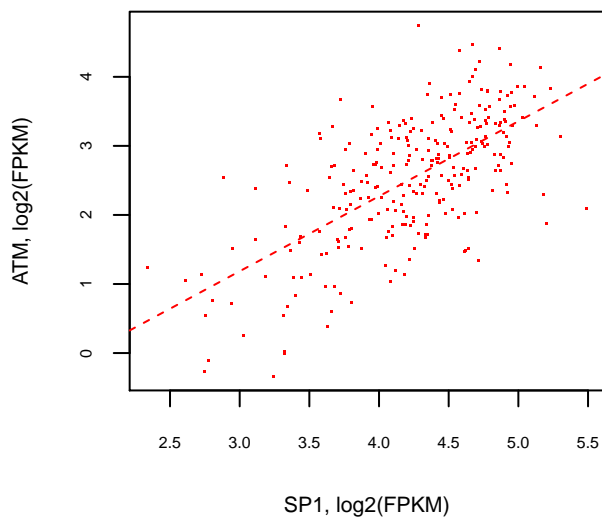

**BRCA, SP1-HRAS**  
H19 lowly expressed, p-value=1.61e-10

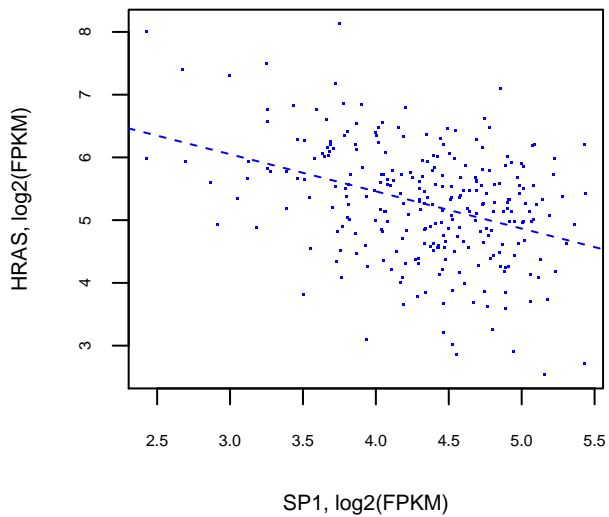

**BRCA, SP1-HRAS**  
H19 highly expressed, p-value=1.06e-32

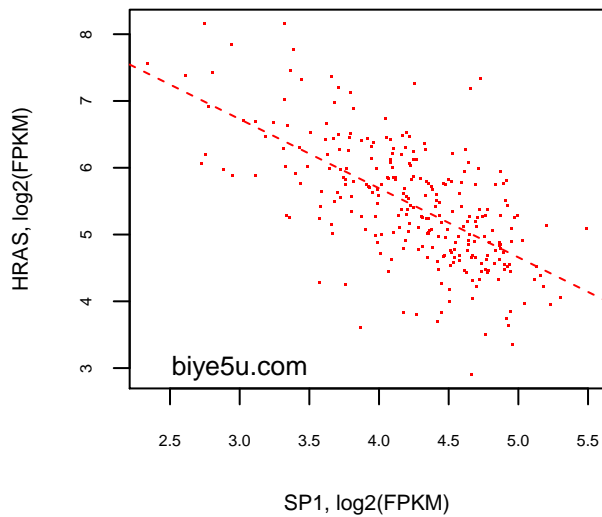

**BRCA, SP1-HSPB1**  
H19 lowly expressed, p-value=6.68e-02

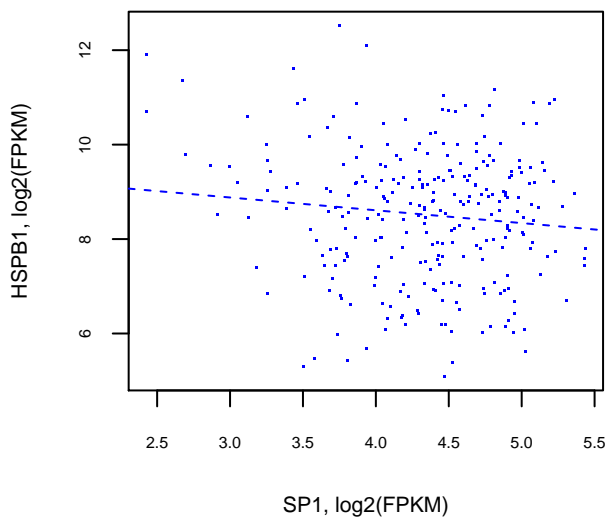

**BRCA, SP1-HSPB1**  
H19 highly expressed, p-value=2.61e-12

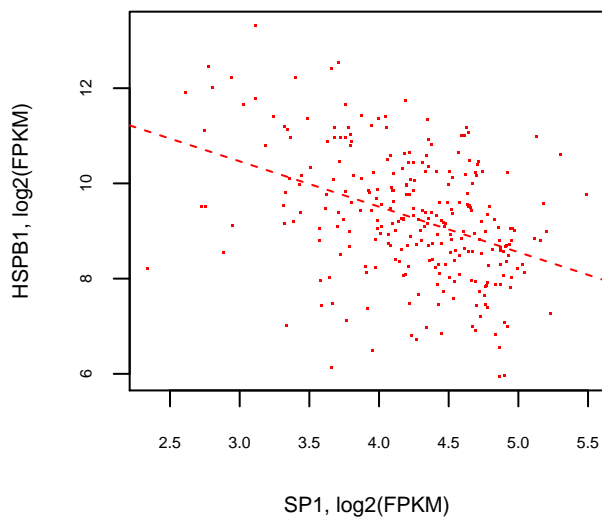

**BRCA, SP1-SIGIRR**  
H19 lowly expressed, p-value=6.2e-02

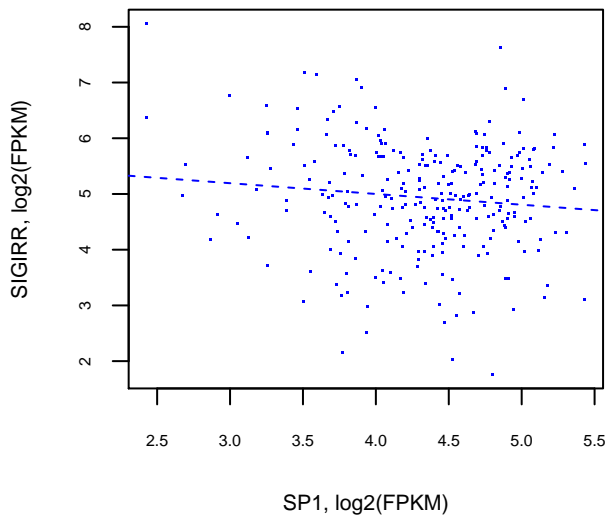

**BRCA, SP1-SIGIRR**  
H19 highly expressed, p-value=1.8e-10

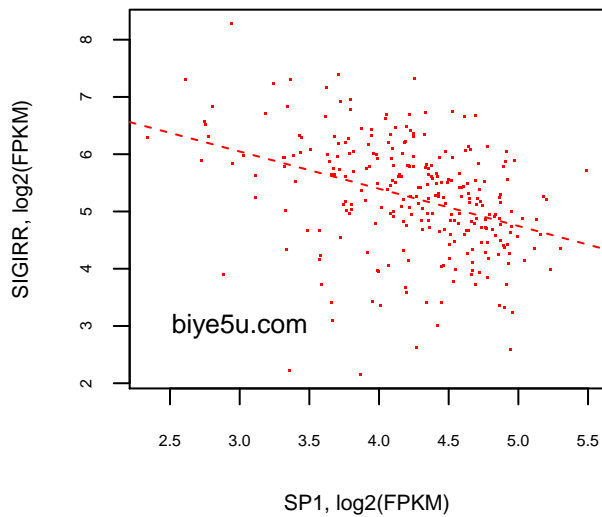

**BRCA, SP1-TGFBR2**  
H19 lowly expressed, p-value=1.03e-08

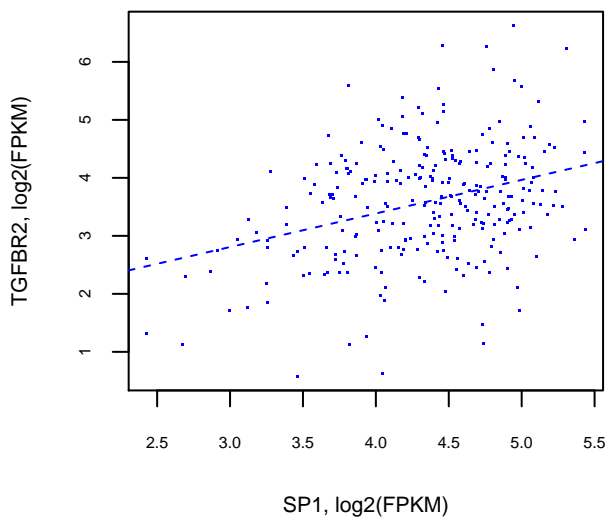

**BRCA, SP1-TGFBR2**  
H19 highly expressed, p-value=1.05e-21

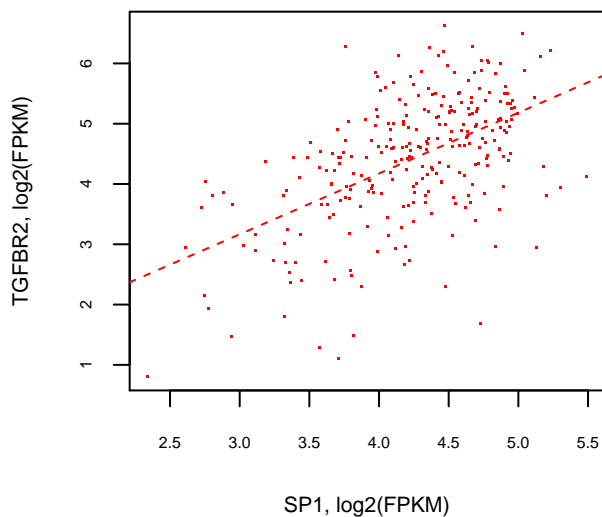

**BRCA, SP1-UTRN**  
H19 lowly expressed, p-value=7.05e-24

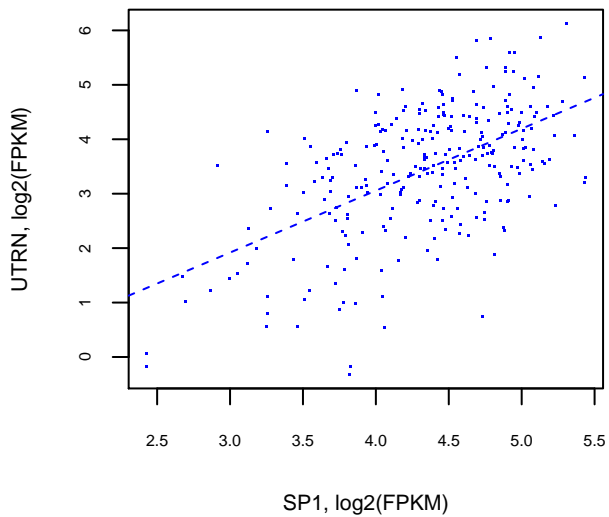

**BRCA, SP1-UTRN**  
H19 highly expressed, p-value=2.86e-51

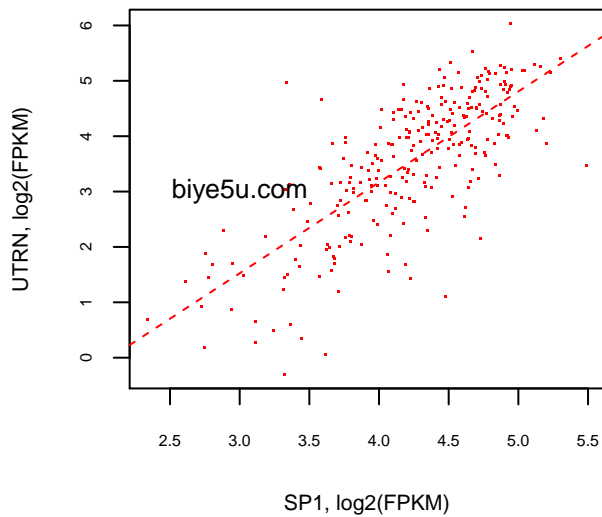

**BRCA, SPI1-CD40**  
H19 lowly expressed, p-value=1.04e-50

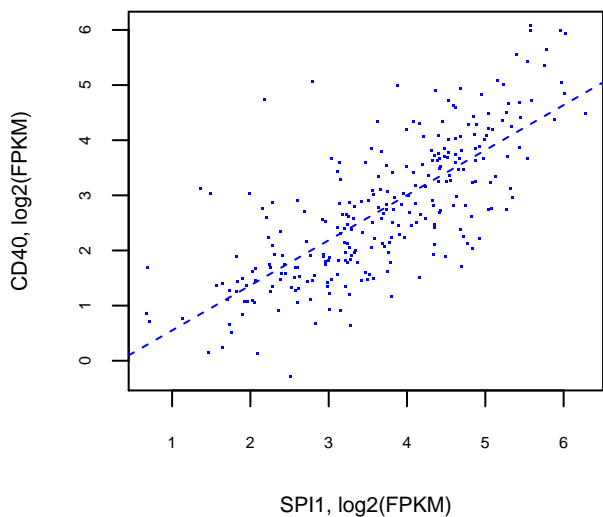

**BRCA, SPI1-CD40**  
H19 highly expressed, p-value=9.71e-40

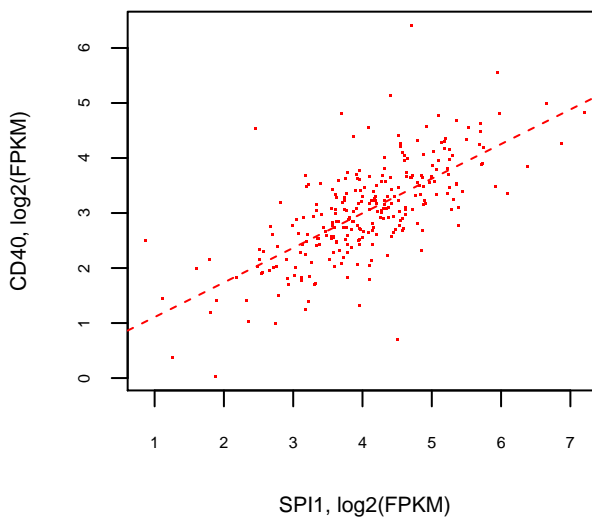

**BRCA, SPI1-IL18**  
H19 lowly expressed, p-value=2.57e-43

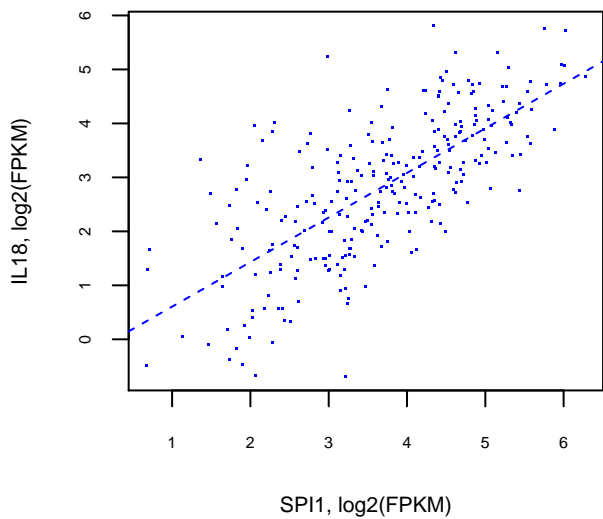

**BRCA, SPI1-IL18**  
H19 highly expressed, p-value=8.64e-17

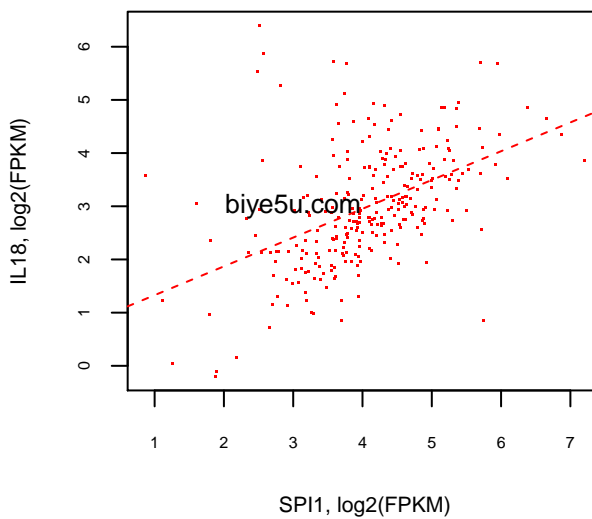

**BRCA, SPI1-NCF2**  
H19 lowly expressed, p-value=3.8e-56

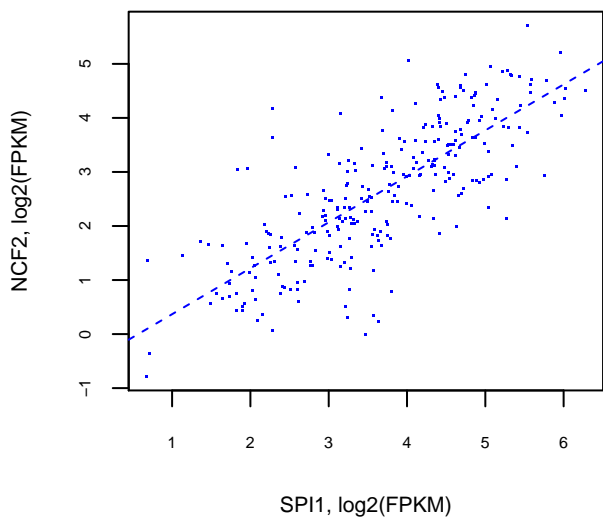

**BRCA, SPI1-NCF2**  
H19 highly expressed, p-value=3.34e-28

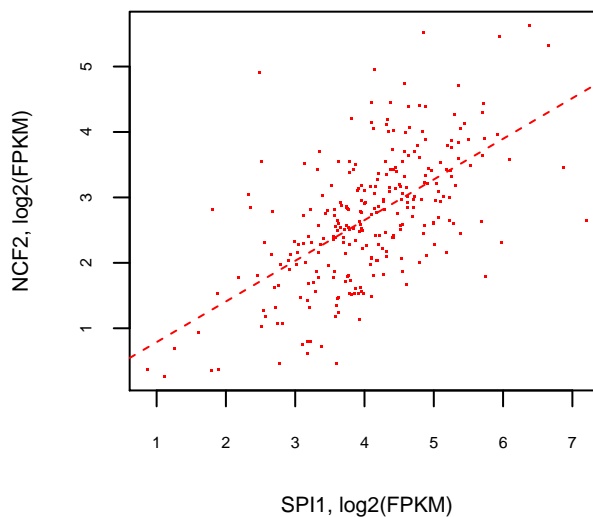

**BRCA, STAT1-CD40**  
H19 lowly expressed, p-value=2.66e-21

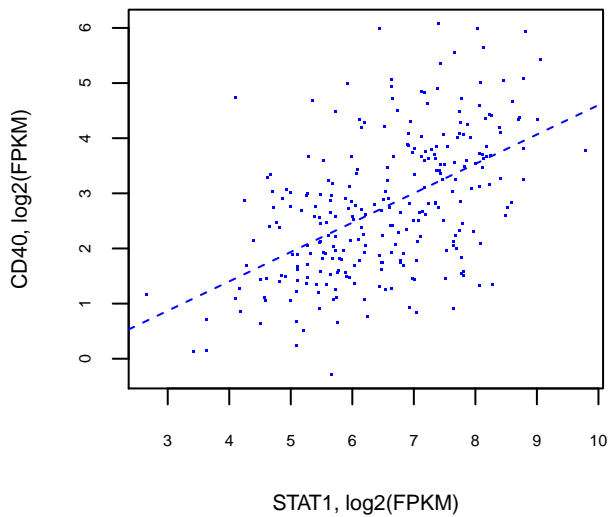

**BRCA, STAT1-CD40**  
H19 highly expressed, p-value=1.71e-06

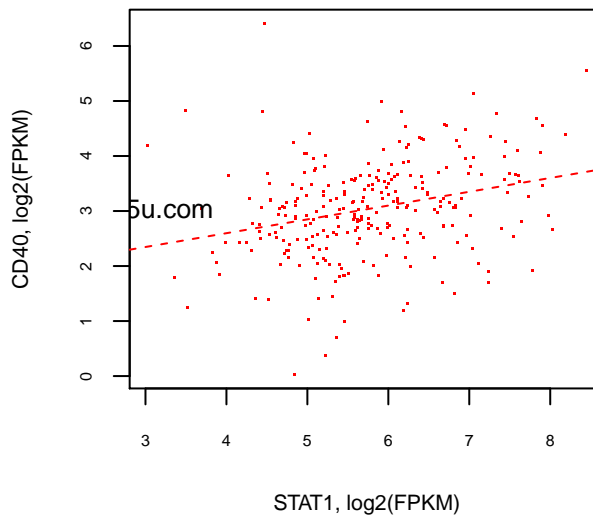

**BRCA, STAT1-FCGR1A**  
H19 lowly expressed, p-value=1.52e-23

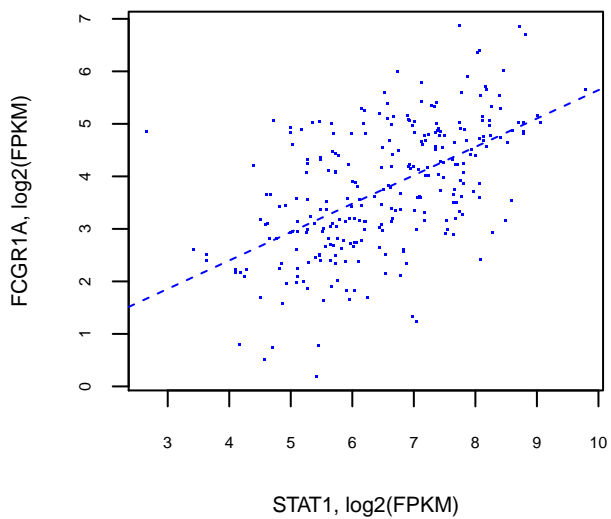

**BRCA, STAT1-FCGR1A**  
H19 highly expressed, p-value=1.26e-04

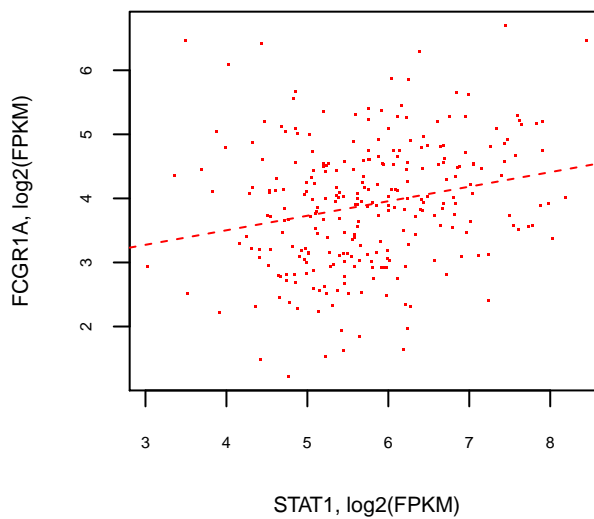

**BRCA, STAT1-SERPING1**  
H19 lowly expressed, p-value=7.07e-23

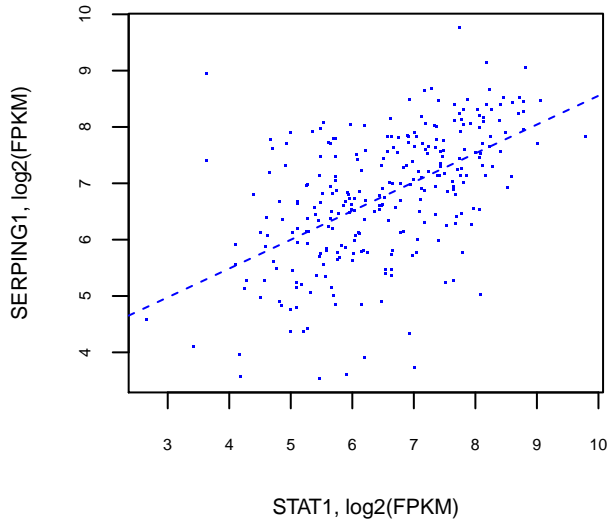

**BRCA, STAT1-SERPING1**  
H19 highly expressed, p-value=4.85e-06

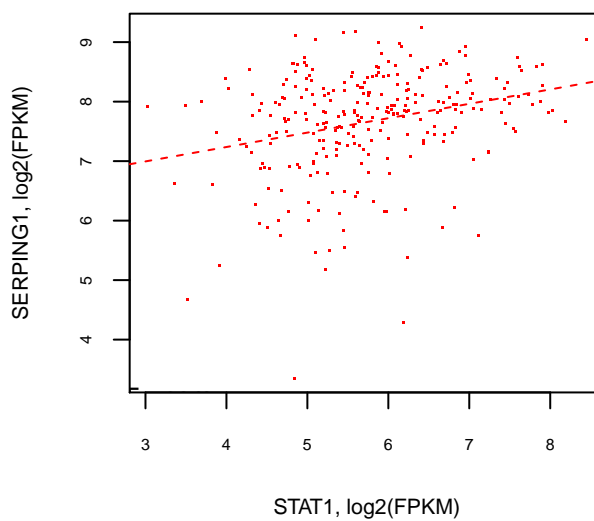

**BRCA, STAT1-TYMP**  
H19 lowly expressed, p-value=6.99e-17

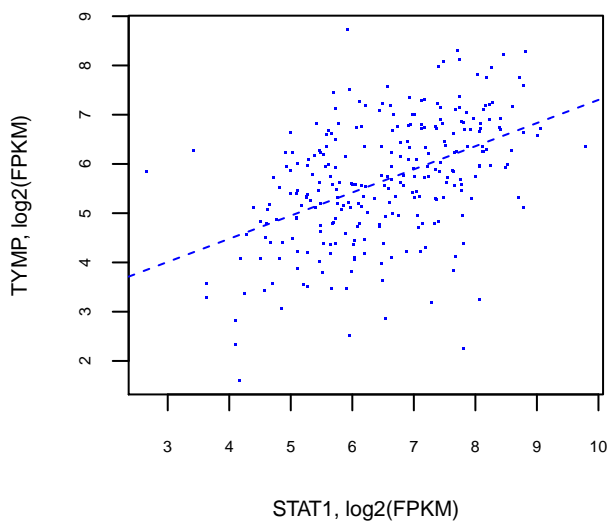

**BRCA, STAT1-TYMP**  
H19 highly expressed, p-value=2.96e-02

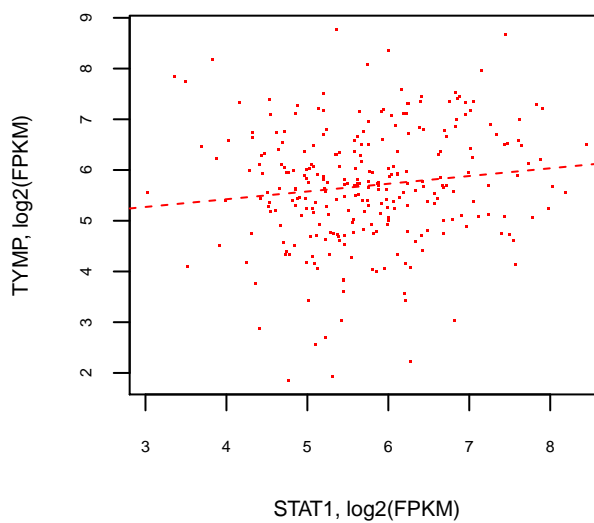

**BRCA, STAT3-AKAP12**  
H19 lowly expressed, p-value=2.81e-06

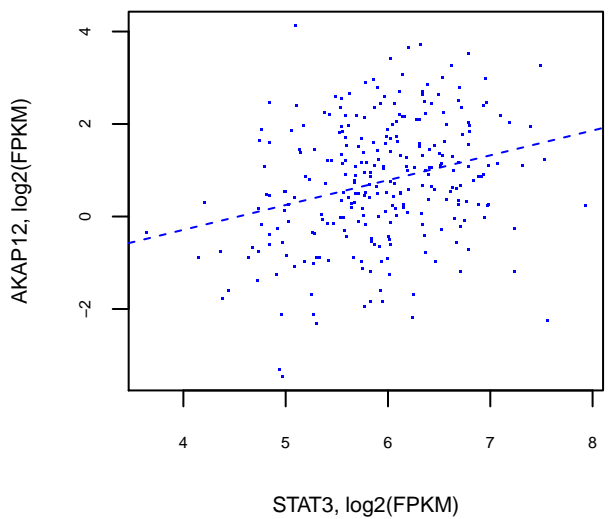

**BRCA, STAT3-AKAP12**  
H19 highly expressed, p-value=1.31e-16

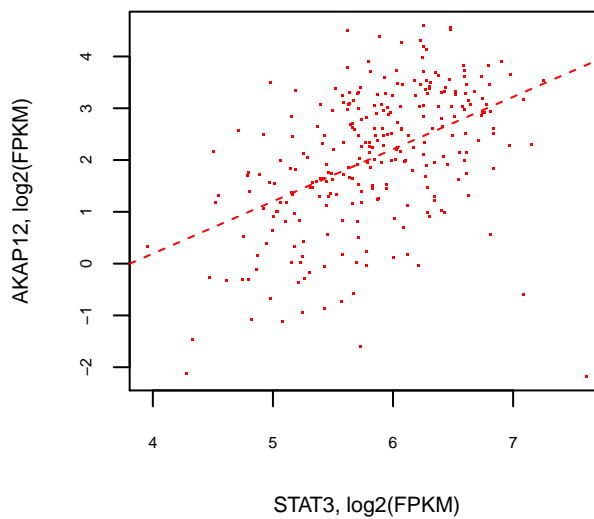



**BRCA, STAT3-IKBKE**  
H19 lowly expressed, p-value=5.74e-02

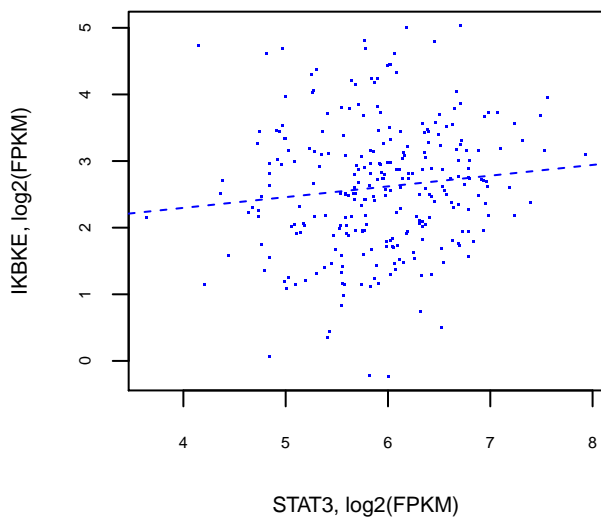

**BRCA, STAT3-IKBKE**  
H19 highly expressed, p-value=2.46e-02

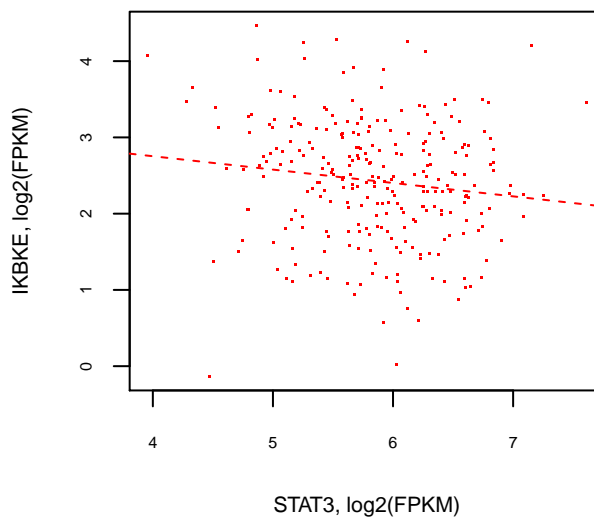

**BRCA, STAT3-KLF11**  
H19 lowly expressed, p-value=1.52e-03

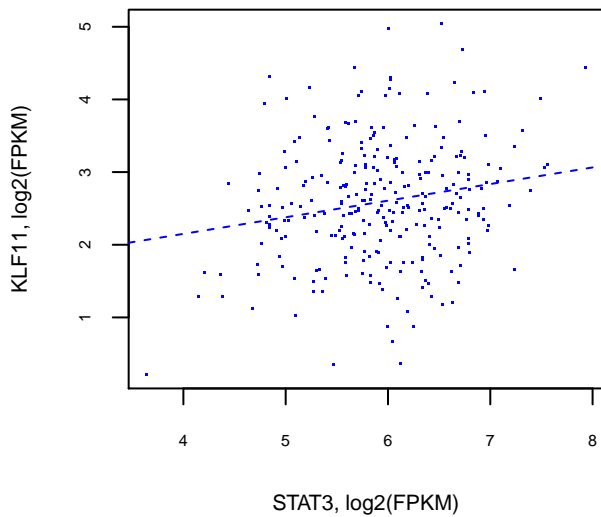

**BRCA, STAT3-KLF11**  
H19 highly expressed, p-value=1.75e-14

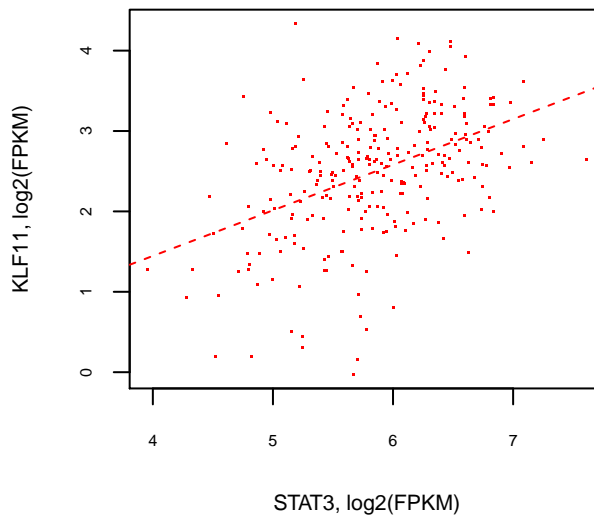

**BRCA, STAT3-NDUFA13**  
H19 lowly expressed, p-value=3.61e-08

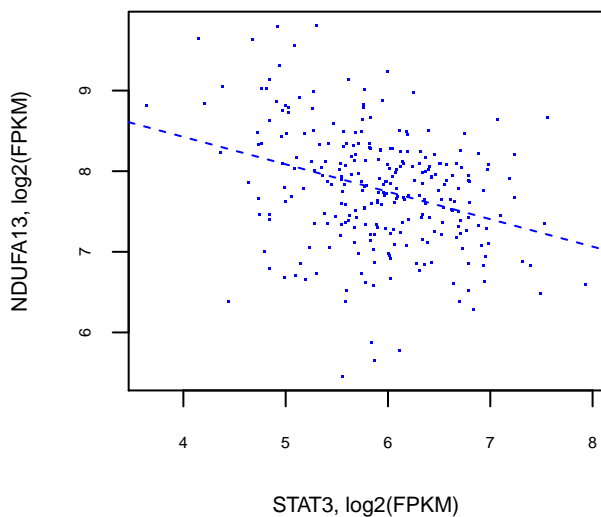

**BRCA, STAT3-NDUFA13**  
H19 highly expressed, p-value=4.08e-18

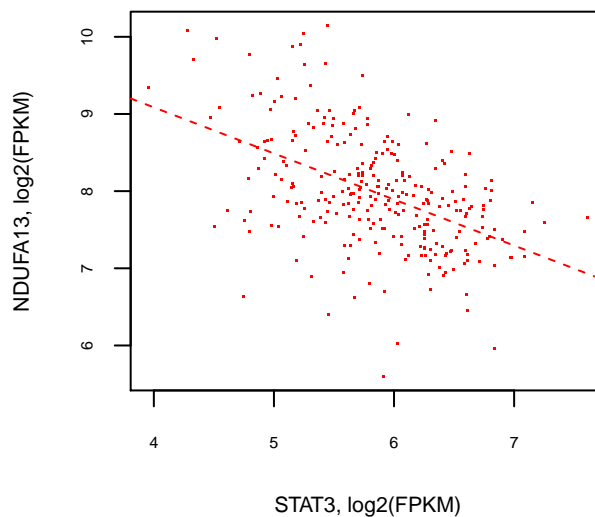

**BRCA, STAT3-TYK2**  
H19 lowly expressed, p-value=2.83e-05

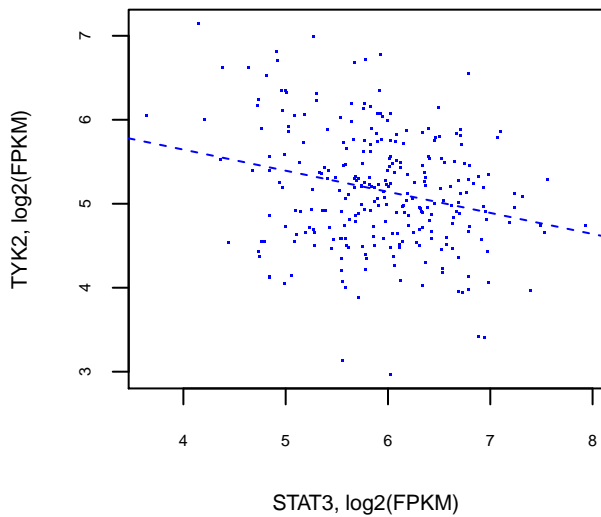

**BRCA, STAT3-TYK2**  
H19 highly expressed, p-value=1.84e-13

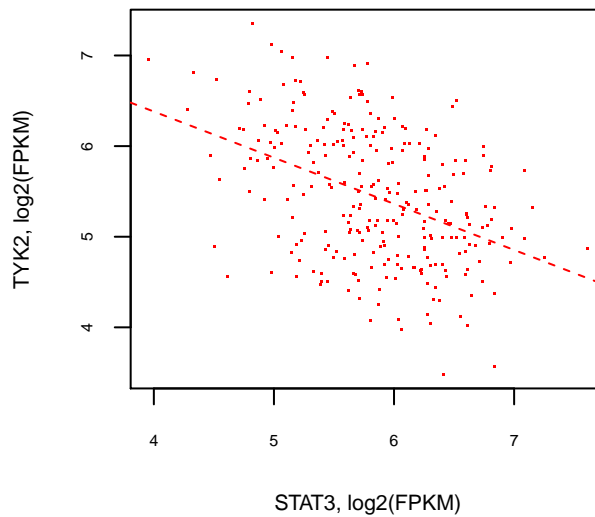

**Table S1.** Number of Samples and Genes

| No | Cancer                      |                                                                     | Total<br>Number of<br>Samples | Samples                       |                       |                    | After FKPM<br>Filtration |                  | TF-gene Interactions  |       |         |
|----|-----------------------------|---------------------------------------------------------------------|-------------------------------|-------------------------------|-----------------------|--------------------|--------------------------|------------------|-----------------------|-------|---------|
|    | Cancer Type<br>Abbreviation | Cancer Type Name                                                    |                               | # Primary<br>Tumor<br>Samples | # Matched<br>Controls | # Other<br>Samples | # Genes                  | Number<br>of TFs | # Pairs (TF-<br>gene) | # TFs | # Genes |
| 1  | BLCA                        | Bladder urothelial carcinoma                                        | 426                           | 407                           | 19                    | 0                  | 11481                    | 683              | 7723                  | 607   | 2103    |
| 2  | BRCA                        | Breast invasive carcinoma                                           | 1212                          | 1092                          | 113                   | 7                  | 11867                    | 694              | 8181                  | 625   | 2198    |
| 3  | CESC                        | Cervical squamous cell carcinoma and<br>endocervical adenocarcinoma | 309                           | 304                           | 3                     | 2                  | 11508                    | 709              | 8057                  | 634   | 2161    |
| 4  | COAD                        | Colon adenocarcinoma                                                | 331                           | 288                           | 41                    | 2                  | 11537                    | 700              | 8123                  | 631   | 2187    |
| 5  | ESCA                        | Esophageal carcinoma                                                | 195                           | 181                           | 13                    | 1                  | 11727                    | 723              | 8277                  | 655   | 2205    |
| 6  | GBM                         | Glioblastoma multiforme                                             | 171                           | 153                           | 5                     | 13                 | 12279                    | 717              | 7755                  | 636   | 2156    |
| 7  | HNSC                        | carcinoma                                                           | 564                           | 518                           | 44                    | 2                  | 11406                    | 691              | 7866                  | 621   | 2140    |
| 8  | KIRC                        | Kidney renal clear cell carcinoma                                   | 91                            | 66                            | 25                    | 0                  | 11881                    | 697              | 7889                  | 628   | 2172    |
| 9  | KIRP                        | Kidney renal papillary cell carcinoma                               | 321                           | 288                           | 32                    | 1                  | 11599                    | 667              | 7130                  | 591   | 2030    |
| 10 | LGG                         | Brain lower grade glioma                                            | 523                           | 509                           | 0                     | 14                 | 12104                    | 678              | 6837                  | 589   | 1996    |
| 11 | LIHC                        | Liver hepatocellular carcinoma                                      | 421                           | 369                           | 50                    | 2                  | 10577                    | 622              | 6988                  | 546   | 1964    |
| 12 | LUAD                        | Lung adenocarcinoma                                                 | 574                           | 513                           | 59                    | 2                  | 12065                    | 695              | 8223                  | 621   | 2233    |
| 13 | LUSC                        | Lung squamous cell carcinoma                                        | 548                           | 498                           | 50                    | 0                  | 12002                    | 720              | 8444                  | 653   | 2281    |
| 14 | OV                          | Ovarian serous cystadenocarcinoma                                   | 427                           | 419                           | 0                     | 8                  | 11838                    | 699              | 8030                  | 622   | 2159    |
| 15 | PAAD                        | Pancreatic adenocarcinoma                                           | 183                           | 178                           | 4                     | 1                  | 12346                    | 722              | 8758                  | 651   | 2369    |
| 16 | PCPG                        | Paranglioma                                                         | 185                           | 177                           | 3                     | 5                  | 11520                    | 660              | 6438                  | 562   | 1896    |
| 17 | PRAD                        | Prostate adenocarcinoma                                             | 548                           | 495                           | 52                    | 1                  | 11785                    | 700              | 7889                  | 624   | 2170    |
| 18 | SARC                        | Sarcoma                                                             | 264                           | 258                           | 2                     | 4                  | 11343                    | 690              | 7353                  | 602   | 2053    |
| 19 | SKCM                        | Skin cutaneous melanoma                                             | 470                           | 102                           | 1                     | 367                | 11028                    | 667              | 7055                  | 585   | 1982    |
| 20 | STAD                        | Stomach adenocarcinoma                                              | 450                           | 414                           | 36                    | 0                  | 11792                    | 726              | 8460                  | 648   | 2252    |
| 21 | TGCT                        | Testicular germ cell tumors                                         | 154                           | 148                           | 0                     | 6                  | 12184                    | 701              | 8042                  | 620   | 2202    |
| 22 | THCA                        | Thyroid carcinoma                                                   | 571                           | 504                           | 59                    | 8                  | 11693                    | 666              | 7284                  | 587   | 2020    |
| 23 | THYM                        | Thymoma                                                             | 571                           | 504                           | 59                    | 8                  | 11757                    | 680              | 7270                  | 602   | 2055    |
| 24 | UCEC                        | Uterine corpus endometrial carcinoma                                | 204                           | 180                           | 23                    | 1                  | 11718                    | 698              | 8092                  | 625   | 2152    |

**Table S2.** Regression of H19's regulation on TF-gene pairs

| Triplet           | BRCA | COAD | HNSC | KIRC | LGG  | LUAD | PAAD | STAD | TGCT | THCA | # of cancer types | H19 lowley expressed | H19 highly expressed |
|-------------------|------|------|------|------|------|------|------|------|------|------|-------------------|----------------------|----------------------|
| H19_AHR_HSPB1     | 5.05 |      |      |      |      |      |      |      |      | 2.98 | 2                 | +                    | ++                   |
| H19_AIP_RSFI      | 2.97 |      |      |      |      |      |      |      |      | 2.77 | 2                 | +                    | ++                   |
| H19_EZH2_DACT3    | 5.87 |      |      |      |      |      |      | 4.90 |      |      | 2                 | +                    | ++                   |
| H19_NFKB1_MIF     | 2.47 |      |      |      |      |      | 3.33 |      |      |      | 2                 | +                    | ++                   |
| H19_NFYB_EDF1     | 5.59 |      |      |      |      |      |      |      |      | 2.28 | 2                 | +                    | ++                   |
| H19_SP1_HRAS      | 4.02 |      |      |      |      |      |      |      |      | 4.98 | 2                 | +                    | ++                   |
| H19_SP1_HSPB1     | 3.50 |      |      |      |      |      |      |      |      | 2.54 | 2                 | +                    | ++                   |
| H19_SP1_SIGIRR    | 3.15 |      |      |      |      |      |      |      |      | 2.16 | 2                 | +                    | ++                   |
| H19_SP3_EDF1      |      |      |      | 5.92 |      |      |      |      |      | 4.91 | 2                 | +                    | ++                   |
| H19_STAT3_NDUFA13 | 2.54 |      |      |      |      |      |      |      |      | 2.93 | 2                 | +                    | ++                   |
| H19_STAT3_TYK2    | 2.57 |      |      |      |      |      |      |      |      | 3.18 | 2                 | +                    | ++                   |
| H19_AHR_CCNG2     | 2.99 |      |      |      |      |      |      | 2.38 |      |      | 2                 | →                    | →→                   |
| H19_AHR_SOS1      | 3.91 |      |      |      |      |      |      | 2.73 |      | 2.94 | 3                 | →                    | →→                   |
| H19_CREBBP_CREB1  | 3.13 |      |      |      |      | 3.94 |      |      |      |      | 2                 | →                    | →→                   |
| H19_E2F3_MAPK8    | 4.49 |      |      |      |      |      |      |      |      | 3.59 | 2                 | →                    | →→                   |
| H19_EGR1_SPRY1    | 3.44 |      |      |      | 3.38 |      |      |      |      |      | 2                 | →                    | →→                   |
| H19_ERG_EPB4IL3   |      |      |      |      |      |      | 2.22 |      |      | 2.84 | 2                 | →                    | →→                   |
| H19_ETS1_TGFBR2   | 9.19 |      |      | 4.21 |      |      |      |      |      |      | 2                 | →                    | →→                   |
| H19_EZH2_BRCA1    | 3.70 |      |      |      | 4.87 |      |      |      |      |      | 2                 | →                    | →→                   |
| H19_FLI1_CTGF     | 2.51 | 3.53 |      |      |      |      |      |      |      |      | 2                 | →                    | →→                   |
| H19_FLI1_TGFBR2   | 6.02 |      | 4.14 |      |      |      |      |      |      |      | 2                 | →                    | →→                   |
| H19_FOSL2_BCL6    | 3.02 | 6.40 |      |      |      |      |      |      |      |      | 2                 | →                    | →→                   |
| H19_FOXM1_CCNB1   |      |      |      |      | 3.83 |      |      |      | 3.39 |      | 2                 | →                    | →→                   |
| H19_FOXO1_TXNIP   | 2.93 |      |      | 3.12 |      |      |      |      |      |      | 2                 | →                    | →→                   |
| H19_GATA2_VWF     | 3.20 |      |      | 8.26 |      |      |      |      |      |      | 2                 | →                    | →→                   |
| H19_HNRNPK EIF4E  |      |      |      |      |      | 2.92 |      |      |      | 5.33 | 2                 | →                    | →→                   |
| H19_KAT2B_SMAD4   | 5.05 |      |      |      |      |      |      |      |      | 2.19 | 2                 | →                    | →→                   |
| H19_KAT2B_ZEB1    | 2.66 |      |      |      |      |      | 2.78 |      |      |      | 2                 | →                    | →→                   |
| H19_KLF4_IL6      | 4.16 |      |      |      |      |      |      |      |      | 3.96 | 2                 | →                    | →→                   |
| H19_KLF6_TXNIP    | 3.26 |      |      |      |      | 2.66 |      |      |      |      | 2                 | →                    | →→                   |
| H19_NFKB1_CHUK    | 3.60 |      |      |      |      |      |      |      |      | 5.56 | 2                 | →                    | →→                   |

| Triplet            | BRCA | COAD | HNSC | KIRC | LGG  | LUAD | PAAD | STAD | TGCT | THCA | # of cancer types | H19 lowley expressed | H19 highly expressed |
|--------------------|------|------|------|------|------|------|------|------|------|------|-------------------|----------------------|----------------------|
| H19_NFYB_HMGCS1    | 2.37 |      |      |      |      |      |      |      |      | 3.79 | 2                 | →                    | →→                   |
| H19_NFYB_SP3       | 7.48 |      |      |      |      |      |      |      |      | 2.79 | 2                 | →                    | →→                   |
| H19_NR3C1_CALD1    | 5.86 |      |      |      |      |      |      |      |      | 2.72 | 2                 | →                    | →→                   |
| H19_PPARA_KLF11    | 6.41 |      |      |      |      |      |      |      |      | 3.46 | 2                 | →                    | →→                   |
| H19_RB1_WRN        | 2.40 |      |      |      |      |      |      |      |      | 2.86 | 2                 | →                    | →→                   |
| H19_RUNX2_MMP2     | 3.20 |      |      |      |      |      |      |      |      | 2.81 | 2                 | →                    | →→                   |
| H19_SOX18_CLDN5    | 9.50 |      |      |      |      | 3.07 |      |      |      |      | 2                 | →                    | →→                   |
| H19_SP1_ADAM17     | 3.71 |      |      |      |      |      |      |      |      | 5.66 | 2                 | →                    | →→                   |
| H19_SP1_ATM        | 3.51 |      |      |      |      |      |      |      |      | 5.70 | 2                 | →                    | →→                   |
| H19_SP1_TGFBR2     | 2.91 |      |      |      |      |      |      |      |      | 4.08 | 2                 | →                    | →→                   |
| H19_SP1_UTRN       | 4.22 |      |      |      |      |      |      |      |      | 3.01 | 2                 | →                    | →→                   |
| H19_STAT3_AKAP12   | 2.67 |      |      |      |      |      |      |      |      | 3.59 | 2                 | →                    | →→                   |
| H19_STAT3_KLF11    | 3.53 |      |      |      |      |      |      |      |      | 3.41 | 2                 | →                    | →→                   |
| H19_TWIST2_SRPX    |      |      |      |      |      | 3.97 | 3.33 |      |      |      | 2                 | →                    | →→                   |
| H19_AHR_CYP1B1     |      |      |      |      |      |      |      |      | 2.45 | 7.59 | 2                 | →→                   | →                    |
| H19_AKNA_CD40      | 2.68 |      |      |      |      |      | 3.30 |      |      |      | 2                 | →→                   | →                    |
| H19_CIITA_HLA-DRA  | 3.73 |      |      |      |      |      |      |      |      | 3.68 | 2                 | →→                   | →                    |
| H19_IRF8_CD68      |      |      |      |      |      |      | 4.43 |      |      | 5.10 | 2                 | →→                   | →                    |
| H19_SNAI2_MET      | 2.58 |      | 5.20 |      |      |      |      |      |      |      | 2                 | →→                   | →                    |
| H19_SPI1_ACP5      |      |      |      |      |      |      | 2.42 |      |      | 4.55 | 2                 | →→                   | →                    |
| H19_SPI1_CD40      | 3.07 |      |      |      |      |      |      | 3.39 |      |      | 2                 | →→                   | →                    |
| H19_SPI1_IL18      | 3.75 |      |      |      |      |      |      |      |      | 3.14 | 2                 | →→                   | →                    |
| H19_SPI1_NCF2      | 3.67 |      |      |      |      |      | 2.63 |      |      |      | 2                 | →→                   | →                    |
| H19_STAT1_CD40     | 4.37 |      |      |      |      |      |      |      |      | 3.12 | 2                 | →→                   | →                    |
| H19_STAT1_FCGR1A   | 4.69 |      |      |      |      |      |      |      |      | 2.73 | 2                 | →→                   | →                    |
| H19_STAT1_SERPING1 | 4.06 |      |      |      |      |      |      |      |      | 4.74 | 2                 | →→                   | →                    |
| H19_STAT1_TYMP     | 3.88 |      |      |      |      | 3.72 |      |      |      |      | 2                 | →→                   | →                    |
| H19_GATA2_VCAM1    | 2.95 |      |      | 6.16 |      |      |      |      |      |      | 2                 | +                    | →                    |
| H19_NFKB1_NCAM1    |      |      |      |      |      |      | 3.51 |      |      | 3.86 | 2                 | +                    | →                    |
| H19_SP1_ME1        |      |      |      |      |      | 4.42 |      |      |      | 5.08 | 2                 | +                    | →                    |
| H19_TP53_IGFBP3    |      |      |      |      | 4.07 |      |      |      |      | 3.41 | 2                 | +                    | →                    |
| H19_CTCF_IPO13     |      |      |      |      |      | 3.15 |      |      |      | 3.26 | 2                 | →                    | +                    |
| H19_E2F1_GADD45B   | 5.75 | 3.86 |      |      |      |      |      |      |      |      | 2                 | →                    | +                    |

| Triplet          | BRCA  | COAD | HNSC | KIRC | LGG | LUAD | PAAD | STAD | TGCT | THCA | # of cancer types | H19 lowley expressed | H19 highly expressed |
|------------------|-------|------|------|------|-----|------|------|------|------|------|-------------------|----------------------|----------------------|
| H19_E2F1_MYC     |       |      |      |      |     |      | 3.64 |      |      | 6.27 | 2                 | →                    | +                    |
| H19_EZH2_CIITA   |       |      |      |      |     |      | 3.52 | 4.20 |      |      | 2                 | →                    | +                    |
| H19_EZH2_SNAI2   | 6.04  | 4.55 |      |      |     |      |      |      |      |      | 2                 | →                    | +                    |
| H19_FOXO1_HYOU1  |       |      |      |      |     | 2.64 |      |      | 9.10 |      | 2                 | →                    | +                    |
| H19_HDAC1_TXNIP  | 4.88  |      |      |      |     | 4.11 |      |      |      |      | 2                 | →                    | +                    |
| H19_HDAC2_TWIST1 | 2.77  | 3.76 |      |      |     |      |      |      |      |      | 2                 | →                    | +                    |
| H19_HDGF_FAS     | 6.14  |      |      |      |     |      | 7.27 |      |      |      | 2                 | →                    | +                    |
| H19_IKZF1_BIRC5  | 4.72  |      |      |      |     |      | 3.70 |      |      |      | 2                 | →                    | +                    |
| H19_MYB_COL1A1   |       | 4.33 |      |      |     |      |      | 4.66 |      |      | 2                 | →                    | +                    |
| H19_MYBL2_COL1A1 | 11.03 | 4.48 |      |      |     |      |      | 6.07 |      |      | 3                 | →                    | +                    |
| H19_MYC_E2F1     |       |      |      |      |     |      | 4.03 |      |      | 5.84 | 2                 | →                    | +                    |
| H19_NFKB2_HIF1A  |       |      |      |      |     | 3.54 | 3.57 |      |      |      | 2                 | →                    | +                    |
| H19_PARP1_FBN1   | 2.70  |      |      |      |     |      |      |      | 5.57 |      | 2                 | →                    | +                    |
| H19_PARP1_FN1    | 3.53  | 3.08 |      |      |     |      |      |      |      |      | 2                 | →                    | +                    |
| H19_POU2AF1_TK1  | 5.63  |      |      |      |     |      | 7.38 |      |      |      | 2                 | →                    | +                    |
| H19_POU2F1_VWF   |       |      |      |      |     | 7.74 |      | 5.91 |      |      | 2                 | →                    | +                    |
| H19_RELA_BGN     |       |      |      |      |     |      | 3.90 |      |      | 3.75 | 2                 | →                    | +                    |
| H19_RUNX1_SYMPK  |       | 5.54 |      |      |     | 7.74 |      |      |      | 5.65 | 3                 | →                    | +                    |
| H19_SOX9_CD3E    |       |      |      | 4.64 |     |      | 5.49 |      |      |      | 2                 | →                    | +                    |
| H19_SP1_ABCA2    |       |      |      |      |     | 8.08 |      |      |      | 4.60 | 2                 | →                    | +                    |
| H19_SP1_FLNA     |       |      |      |      |     | 5.20 |      |      |      | 5.60 | 2                 | →                    | +                    |
| H19_STAT3_DNMT1  |       |      |      |      |     | 4.92 |      |      |      | 3.38 | 2                 | →                    | +                    |
| H19_STAT3_IKBKE  | 2.59  |      |      |      |     |      |      | 6.50 |      |      | 2                 | →                    | +                    |
| H19_USF1_FMR1    |       |      |      |      |     |      | 3.09 |      |      | 2.91 | 2                 | →                    | +                    |

**Notes:** The values are transformed as  $-\log_{10}(\text{p-value})$ . Pattern: → activation, + repression.



| No | TF/Gene | BRCA  | COAD  | HNSC | KIRC | LGG  | LUAD  | PAAD  | STAD | TGCT  | THCA  |
|----|---------|-------|-------|------|------|------|-------|-------|------|-------|-------|
| 21 | FLI1    | [68]  |       | [72] |      |      |       |       |      |       |       |
|    | TGFBR2  | [52]  |       | [73] |      |      |       |       |      |       |       |
| 22 | FOSL2   | [74]  | [75]  |      |      |      |       |       |      |       |       |
|    | BCL6    | [76]  | [77]  |      |      |      |       |       |      |       |       |
| 23 | FOXM1   | [78]  |       |      |      | [79] |       |       |      | [80]  |       |
|    | CCNB1   | [81]  |       |      |      | [82] |       |       |      | [83]  |       |
| 24 | FOXO1   | [84]  |       |      |      |      | [85]  |       |      | [86]  |       |
|    | HYOU1   | [87]  |       |      |      |      | [88]  |       |      | ?     |       |
| 25 | FOXO1   | [84]  |       |      | [89] |      |       |       |      |       |       |
|    | TXNIP   | [90]  |       |      | [91] |      |       |       |      |       |       |
| 26 | GATA2   | [92]  |       |      | [93] |      |       |       |      |       |       |
|    | VCAM1   | [94]  |       |      | [93] |      |       |       |      |       |       |
| 27 | GATA2   | [92]  |       |      | [93] |      |       |       |      |       |       |
|    | VWF     | [95]  |       |      | [96] |      |       |       |      |       |       |
| 28 | HDAC1   | [97]  |       |      |      |      | [98]  |       |      |       |       |
|    | TXNIP   | [90]  |       |      |      |      | [99]  |       |      |       |       |
| 29 | HDAC2   | [100] | [101] |      |      |      |       |       |      |       |       |
|    | TWIST1  | [102] | [103] |      |      |      |       |       |      |       |       |
| 30 | HDGF    | [104] |       |      |      |      |       | [105] |      |       |       |
|    | FAS     | [106] |       |      |      |      |       | [107] |      |       |       |
| 31 | HNRNPK  |       |       |      |      |      | [108] |       |      |       | [109] |
|    | EIF4E   |       |       |      |      |      | [110] |       |      |       | [111] |
| 32 | IKZF1   | [112] |       |      |      |      |       | [113] |      |       |       |
|    | BIRC5   | [114] |       |      |      |      |       | [115] |      |       |       |
| 33 | IRF8    |       |       |      |      |      |       | [116] |      |       | [117] |
|    | CD68    |       |       |      |      |      |       | [118] |      |       | [119] |
| 34 | KAT2B   | [120] |       |      |      |      |       |       |      |       | [121] |
|    | SMAD4   | [122] |       |      |      |      |       |       |      |       | [123] |
| 35 | KAT2B   | [120] |       |      |      |      |       | [124] |      |       |       |
|    | ZEB1    | [125] |       |      |      |      |       | [126] |      |       |       |
| 36 | KLF4    | [127] |       |      |      |      |       |       |      |       | [128] |
|    | IL6     | [129] |       |      |      |      |       |       |      |       | [130] |
| 37 | KLF6    | [131] |       |      |      |      | [132] |       |      |       |       |
|    | TXNIP   | [90]  |       |      |      |      | [99]  |       |      |       |       |
| 38 | MYB     |       | [133] |      |      |      |       |       |      | [134] |       |
|    | COL1A1  |       | [135] |      |      |      |       |       |      | [136] |       |
| 39 | MYBL2   | [137] | [35]  |      |      |      |       |       |      | [138] |       |
|    | COL1A1  | [139] | [135] |      |      |      |       |       |      | [136] |       |
| 40 | MYC     |       |       |      |      |      |       | [38]  |      |       | [39]  |
|    | E2F1    |       |       |      |      |      |       | [36]  |      |       | [37]  |



| No | TF/Gene | BRCA  | COAD  | HNSC  | KIRC  | LGG | LUAD  | PAAD  | STAD  | TGCT  | THCA  |
|----|---------|-------|-------|-------|-------|-----|-------|-------|-------|-------|-------|
| 41 | NFKB1   | [140] |       |       |       |     |       |       |       |       | [141] |
|    | CHUK    | [142] |       |       |       |     |       |       |       |       | ?     |
| 42 | NFKB1   | [143] |       |       |       |     |       | [144] |       |       |       |
|    | MIF     |       |       |       |       |     |       | [145] |       |       |       |
| 43 | NFKB1   |       |       |       |       |     |       | [144] |       |       | [141] |
|    | NCAM1   |       |       |       |       |     |       | [146] |       |       | [147] |
| 44 | NFKB2   |       |       |       |       |     | [148] | [149] |       |       |       |
|    | HIF1A   |       |       |       |       |     | [150] | [151] |       |       |       |
| 45 | NFYB    | [152] |       |       |       |     |       |       |       |       | [153] |
|    | EDF1    | [154] |       |       |       |     |       |       |       |       | ?     |
| 46 | NFYB    | [152] |       |       |       |     |       |       |       |       | [153] |
|    | HMGCS1  | [155] |       |       |       |     |       |       |       |       | [156] |
| 47 | NFYB    | [152] |       |       |       |     |       |       |       |       | [153] |
|    | SP3     | [157] |       |       |       |     |       |       |       |       | [158] |
| 48 | NR3C1   | [159] |       |       |       |     |       |       |       |       | [160] |
|    | CALD1   | [161] |       |       |       |     |       |       |       |       | [162] |
| 49 | PARP1   | [163] |       |       |       |     |       |       |       | [164] |       |
|    | FBN1    | [161] |       |       |       |     |       |       |       | [165] |       |
| 50 | PARP1   | [163] | [166] |       |       |     |       |       |       |       |       |
|    | FN1     | [167] | [168] |       |       |     |       |       |       |       |       |
| 51 | POU2AF1 | [169] |       |       |       |     |       | [170] |       |       |       |
|    | TK1     | [171] |       |       |       |     |       | [172] |       |       |       |
| 52 | POU2F1  |       |       |       |       |     | [173] |       | [174] |       |       |
|    | VWF     |       |       |       |       |     | [175] |       | [176] |       |       |
| 53 | PPARA   | [177] |       |       |       |     |       |       |       |       | [178] |
|    | KLF11   | [179] |       |       |       |     |       |       |       |       | [180] |
| 54 | RB1     | [181] |       |       |       |     |       |       |       |       | [182] |
|    | WRN     | [183] |       |       |       |     |       |       |       |       | [184] |
| 55 | RELA    |       |       |       |       |     |       | [185] |       |       | [186] |
|    | BGN     |       |       |       |       |     |       | [187] |       |       | ?     |
| 56 | RUNX1   |       | [188] |       |       |     | [189] |       |       |       | [190] |
|    | SYMPK   |       | [191] |       |       |     | [192] |       |       |       | ?     |
| 57 | RUNX2   | [193] |       |       |       |     |       |       |       |       | [194] |
|    | MMP2    | [195] |       |       |       |     |       |       |       |       | [196] |
| 58 | SNAI2   | [66]  |       | [197] |       |     |       |       |       |       |       |
|    | MET     | [198] |       | [199] |       |     |       |       |       |       |       |
| 59 | SOX18   | [200] |       |       |       |     | [201] |       |       |       |       |
|    | CLDN5   | [202] |       |       |       |     | [203] |       |       |       |       |
| 60 | SOX9    |       |       |       | [204] |     |       | [205] |       |       |       |
|    | CD3E    |       |       |       | [206] |     |       | [207] |       |       |       |



| No | TF/Gene | BRCA  | COAD | HNSC | KIRC | LGG   | LUAD  | PAAD  | STAD  | TGCT | THCA  |
|----|---------|-------|------|------|------|-------|-------|-------|-------|------|-------|
| 81 | STAT3   |       |      |      |      |       | [254] |       |       |      | [251] |
|    | DNMT1   |       |      |      |      |       | [255] |       |       |      | [256] |
| 82 | STAT3   | [250] |      |      |      |       |       |       | [257] |      |       |
|    | IKBKE   | [258] |      |      |      |       |       |       | [259] |      |       |
| 83 | STAT3   | [250] |      |      |      |       |       |       |       |      | [251] |
|    | KLF11   | [179] |      |      |      |       |       |       |       |      | [180] |
| 84 | STAT3   | [250] |      |      |      |       |       |       |       |      | [251] |
|    | NDUFA13 | [260] |      |      |      |       |       |       |       |      | [261] |
| 85 | STAT3   | [250] |      |      |      |       |       |       |       |      | [251] |
|    | TYK2    | [262] |      |      |      |       |       |       |       |      | [263] |
| 86 | TP53    |       |      |      |      | [264] |       |       |       |      | [265] |
|    | IGFBP3  |       |      |      |      | [266] |       |       |       |      | [267] |
| 87 | TWIST2  |       |      |      |      |       | [268] | [269] |       |      |       |
|    | SRPX    |       |      |      |      |       | [270] | [271] |       |      |       |
| 88 | USF1    |       |      |      |      |       |       | ?     |       |      | [272] |
|    | FMR1    |       |      |      |      |       |       | [273] |       |      | [274] |

**Notes:** ‘?’ means having not found related evidences. There are 13 TFs/genes which have not evidences to support their relation to specific cancers. TF: Transcription Factor, BRCA: Breast invasive carcinoma, COAD: Colon adenocarcinoma, HNSC: Head and Neck squamous cell carcinoma, KIRC: Kidney renal clear cell carcinoma, LGG: Brain Lower Grade Glioma, LUAD: Lung adenocarcinoma, PAAD: Pancreatic adenocarcinoma, STAD: Stomach adenocarcinoma, TGCT: Testicular Germ Cell Tumors, THCA: Thyroid carcinoma.

## References

1. D'Amato NC, Rogers TJ, Gordon MA, Greene LI, Cochrane DR, Spoelstra NS, Nemkov TG, D'Alessandro A, Hansen KC, Richer JK: **A TDO2-AhR signaling axis facilitates anoikis resistance and metastasis in triple-negative breast cancer.** *Cancer research* 2015, **75**(21):4651-4664.
2. Koliopanos A, Kleeff J, Xiao Y, Safe S, Zimmermann A, Büchler MW, Friess H: **Increased arylhydrocarbon receptor expression offers a potential therapeutic target for pancreatic cancer.** *Oncogene* 2002, **21**(39):6059.
3. Li XJ, Ren ZJ, Tang JH, Yu Q: **Exosomal microRNA miR-1246 promotes cell proliferation, invasion and drug resistance by targeting CCNG2 in breast cancer.** *Cellular Physiology and Biochemistry* 2017, **44**(5):1741-1748.
4. Hasegawa S, Eguchi H, Nagano H, Konno M, Tomimaru Y, Wada H, Hama N, Kawamoto K, Kobayashi S, Nishida N: **MicroRNA-1246 expression associated with CCNG2-mediated chemoresistance and stemness in pancreatic cancer.** *British journal of cancer* 2014, **111**(8):1572.
5. Brokken LJ, Lundberg-Giwercman Y, Meyts R-D, Eberhard J, Stahl O, Cohn-Cedermark G, Daugaard G, Arver S, Giwercman A: **Association between polymorphisms in the aryl hydrocarbon receptor repressor gene and disseminated testicular germ cell cancer.** *Frontiers in endocrinology* 2013, **4**:4.
6. Haymart MR, Banerjee M, Yin H, Worden F, Griggs JJ: **Marginal treatment benefit in**

- anaplastic thyroid cancer.** *Cancer* 2013, **119**(17):3133-3139.
7. Richiardi L, Pettersson A, Akre O: **Genetic and environmental risk factors for testicular cancer.** *International journal of andrology* 2007, **30**(4):230-241.
  8. Poljaková J, Eckschlager T, Kizek R, Frei E, Stiborová M: **Electrochemical determination of enzymes metabolizing ellipticine in thyroid cancer cells—A tool to explain the mechanism of ellipticine toxicity to these cells.** *Int J Electrochem Sci* 2013, **8**(2):1573-1585.
  9. Cayado-Gutiérrez N, Moncalero VL, Rosales EM, Berón W, Salvatierra EE, Alvarez-Olmedo D, Radrizzani M, Ciocca DR: **Downregulation of Hsp27 (HSPB1) in MCF-7 human breast cancer cells induces upregulation of PTEN.** *Cell Stress and Chaperones* 2013, **18**(2):243-249.
  10. Li Y, Yang Q, Guan H, Shi B, Ji M, Hou P: **ZNF677 suppresses Akt phosphorylation and tumorigenesis in thyroid cancer.** *Cancer research* 2018, **78**(18):5216-5228.
  11. Yu Y, Nie Y, Feng Q, Qu J, Wang R, Bian L, Xia J: **Targeted covalent inhibition of Grb2–Sos1 interaction through proximity-induced conjugation in breast cancer cells.** *Molecular pharmaceutics* 2017, **14**(5):1548-1557.
  12. Swanson KD, Winter JM, Reis M, Bentires-Alj M, Greulich H, Grewal R, Hruban RH, Yeo CJ, Yassin Y, Iartchouk O: **SOS1 mutations are rare in human malignancies: implications for Noonan Syndrome patients.** *Genes, Chromosomes and Cancer* 2008, **47**(3):253-259.
  13. Yoo S-K, Lee S, Kim S-j, Jee H-G, Kim B-A, Cho H, Song YS, Cho SW, Won J-K, Shin J-Y: **Comprehensive analysis of the transcriptional and mutational landscape of follicular and papillary thyroid cancers.** *PLoS genetics* 2016, **12**(8):e1006239.
  14. Georgitsi M, Karhu A, Winqvist R, Visakorpi T, Waltering K, Vahteristo P, Launonen V, Aaltonen L: **Mutation analysis of aryl hydrocarbon receptor interacting protein (AIP) gene in colorectal, breast, and prostate cancers.** *British journal of cancer* 2007, **96**(2):352.
  15. Kimmel RR, Zhao LP, Nguyen D, Lee S, Aronszajn M, Cheng C, Troshin VP, Abrosimov A, Delrow J, Tuttle RM: **Microarray comparative genomic hybridization reveals genome-wide patterns of DNA gains and losses in post-Chernobyl thyroid cancer.** *Radiation research* 2006, **166**(3):519-531.
  16. Mao T-L, Hsu C-Y, Yen MJ, Gilks B, Sheu JJ-C, Gabrielson E, Vang R, Cope L, Kurman RJ, Wang T-L: **Expression of Rsf-1, a chromatin-remodeling gene, in ovarian and breast carcinoma.** *Human pathology* 2006, **37**(9):1169-1175.
  17. Ito Y, Miyoshi E, Sasaki N, Kakudo K, Yoshida H, Tomoda C, Uruno T, Takamura Y, Miya A, Kobayashi K: **Polo-like kinase 1 overexpression is an early event in the progression of papillary carcinoma.** *British journal of cancer* 2004, **90**(2):414.
  18. Alvarez C, Aravena A, Tapia T, Rozenblum E, Solís L, Corvalán A, Camus M, Alvarez M, Munroe D, Maass A: **Different Array CGH profiles within hereditary breast cancer tumors associated to BRCA1 expression and overall survival.** *BMC cancer* 2016, **16**(1):219.
  19. Lei J, Wu Z, Jiang Z, Li J, Zong L, Chen X, Duan W, Xu Q, Zhang L, Han L: **Pancreatic carcinoma-specific immunotherapy using novel tumor specific cytotoxic T cells.** *Oncotarget* 2016, **7**(50):83601.

20. Tong AW, Papayoti MH, Netto G, Armstrong DT, Ordonez G, Lawson JM, Stone MJ: **Growth-inhibitory effects of CD40 ligand (CD154) and its endogenous expression in human breast cancer.** *Clinical cancer research* 2001, **7**(3):691-703.
21. Beatty GL, Chiorean EG, Fishman MP, Saboury B, Teitelbaum UR, Sun W, Huhn RD, Song W, Li D, Sharp LL: **CD40 agonists alter tumor stroma and show efficacy against pancreatic carcinoma in mice and humans.** *Science* 2011, **331**(6024):1612-1616.
22. Shi B, Vinyals A, Alia P, Broceño C, Chen F, Adrover M, Gelpi C, Price JE, Fabra À: **Differential expression of MHC class II molecules in highly metastatic breast cancer cells is mediated by the regulation of the CIITA transcription: implication of CIITA in tumor and metastasis development.** *The international journal of biochemistry & cell biology* 2006, **38**(4):544-562.
23. Jo YS, Lee JC, Li S, Choi YS, Bai YS, Kim YJ, Lee IS, Rha SY, Ro Hk, Kim JM: **Significance of the expression of major histocompatibility complex class II antigen, HLA-DR and-DQ, with recurrence of papillary thyroid cancer.** *International journal of cancer* 2008, **122**(4):785-790.
24. Rangel LB, Agarwal R, Sherman-Baust CA, de Mello-Coelho V, Pizer ES, Ji H, Taub DD, Morin PJ: **Anomalous expression of the HLA-DR alpha and beta chains in ovarian and other cancers.** *Cancer biology & therapy* 2004, **3**(10):1021-1027.
25. Finn S, Smyth P, Cahill S, Streck C, O'regan E, Flavin R, Sherlock J, Howells D, Henfrey R, Cullen M: **Expression microarray analysis of papillary thyroid carcinoma and benign thyroid tissue: emphasis on the follicular variant and potential markers of malignancy.** *Virchows Archiv* 2007, **450**(3):249-260.
26. Gupta A, Patnaik MM, Naina HV: **MYST3/CREBBP rearranged acute myeloid leukemia after adjuvant chemotherapy for breast cancer.** *Case reports in oncological medicine* 2014, **2014**.
27. Tillinghast GW, Partee J, Albert P, Kelley JM, Burtow KH, Kelly K: **Analysis of genetic stability at the EP300 and CREBBP loci in a panel of cancer cell lines.** *Genes, Chromosomes and Cancer* 2003, **37**(2):121-131.
28. Chhabra A, Fernando H, Watkins G, Mansel RE, Jiang WG: **Expression of transcription factor CREB1 in human breast cancer and its correlation with prognosis.** *Oncology reports* 2007, **18**(4):953-958.
29. Cho JH, Hong WG, Jung Y-J, Lee J, Lee E, Hwang S-G, Um H-D, Park JK: **Gamma-Ionizing radiation-induced activation of the EGFR-p38/ERK-STAT3/CREB-1-EMT pathway promotes the migration/invasion of non-small cell lung cancer cells and is inhibited by podophyllotoxin acetate.** *Tumor Biology* 2016, **37**(6):7315-7325.
30. Hong JA, Kang Y, Abdullaev Z, Flanagan PT, Pack SD, Fischette MR, Adnani MT, Loukinov DI, Vatolin S, Risinger JI: **Reciprocal binding of CTCF and BORIS to the NY-ESO-1 promoter coincides with derepression of this cancer-testis gene in lung cancer cells.** *Cancer research* 2005, **65**(17):7763-7774.
31. Wei W-J, Lu Z-W, Wang Y, Zhu Y-X, Wang Y-L, Ji Q-H: **Clinical significance of papillary thyroid cancer risk loci identified by genome-wide association studies.** *Cancer genetics* 2015, **208**(3):68-75.
32. Frietze S, Lupien M, Silver PA, Brown M: **CARM1 regulates estrogen-stimulated breast cancer growth through up-regulation of E2F1.** *Cancer research* 2008,

- 68(1):301-306.
33. Kasahara M, Takahashi Y, Nagata T, Asai S, Eguchi T, Ishii Y, Fujii M, Ishikawa K: **Thymidylate synthase expression correlates closely with E2F1 expression in colon cancer.** *Clinical cancer research* 2000, **6(7):2707-2711.**
  34. Gomis RR, Alarcón C, Nadal C, Van Poznak C, Massagué J: **C/EBP $\beta$  at the core of the TGF $\beta$  cytostatic response and its evasion in metastatic breast cancer cells.** *Cancer cell* 2006, **10(3):203-214.**
  35. Clark-Langone KM, Sangli C, Krishnakumar J, Watson D: **Translating tumor biology into personalized treatment planning: analytical performance characteristics of the Onco type DX<sup>®</sup> Colon Cancer Assay.** *BMC cancer* 2010, **10(1):691.**
  36. Rödicke F, Stiewe T, Zimmermann S, Pützer BM: **Therapeutic efficacy of E2F1 in pancreatic cancer correlates with TP73 induction.** *Cancer research* 2001, **61(19):7052-7055.**
  37. Onda M, Nagai H, Yoshida A, Miyamoto S, Asaka S-i, Akaishi J, Takatsu K, Nagahama M, Ito K, Shimizu K: **Up-regulation of transcriptional factor E2F1 in papillary and anaplastic thyroid cancers.** *Journal of human genetics* 2004, **49(6):312.**
  38. Sancho P, Burgos-Ramos E, Tavera A, Kheir TB, Jagust P, Schoenhals M, Barneda D, Sellers K, Campos-Olivas R, Graña O: **MYC/PGC-1 $\alpha$  balance determines the metabolic phenotype and plasticity of pancreatic cancer stem cells.** *Cell metabolism* 2015, **22(4):590-605.**
  39. Zhu X, Zhao L, Park JW, Willingham MC, Cheng S-y: **Synergistic signaling of KRAS and thyroid hormone receptor  $\beta$  mutants promotes undifferentiated thyroid cancer through MYC up-regulation.** *Neoplasia* 2014, **16(9):757-769.**
  40. Vimala K, Sundarraj S, Sujitha MV, Kannan S: **Curtailling overexpression of E2F3 in breast cancer using siRNA (E2F3)-based gene silencing.** *Archives of medical research* 2012, **43(6):415-422.**
  41. Ziebold U, Lee EY, Bronson RT, Lees JA: **E2F3 loss has opposing effects on different pRB-deficient tumors, resulting in suppression of pituitary tumors but metastasis of medullary thyroid carcinomas.** *Molecular and cellular biology* 2003, **23(18):6542-6552.**
  42. Stephens PJ, Tarpey PS, Davies H, Van Loo P, Greenman C, Wedge DC, Nik-Zainal S, Martin S, Varela I, Bignell GR: **The landscape of cancer genes and mutational processes in breast cancer.** *Nature* 2012, **486(7403):400.**
  43. Bauer J, Kopp S, Schlagberger E, Grosse J, Sahana J, Riwaldt S, Wehland M, Luetzenberg R, Infanger M, Grimm D: **Proteome analysis of human follicular thyroid cancer cells exposed to the random positioning machine.** *International journal of molecular sciences* 2017, **18(3):546.**
  44. Redmond K, Crawford N, Farmer H, D'costa Z, O'brien G, Buckley N, Kennedy R, Johnston P, Harkin D, Mullan P: **T-box 2 represses NDRG1 through an EGR1-dependent mechanism to drive the proliferation of breast cancer cells.** *Oncogene* 2010, **29(22):3252.**
  45. Calogero A, Arcella A, De Gregorio G, Porcellini A, Mercola D, Liu C, Lombardi V, Zani M, Giannini G, Gagliardi FM: **The early growth response gene EGR-1 behaves as a suppressor gene that is down-regulated independent of ARF/Mdm2 but not p53 alterations in fresh human gliomas.** *Clinical Cancer Research* 2001, **7(9):2788-2796.**

46. Fernandez S, Russo J: **Estrogen and xenoestrogens in breast cancer.** *Toxicologic pathology* 2010, **38**(1):110-122.
47. Moore LM, Zhang W: **Targeting miR-21 in glioma: a small RNA with big potential.** *Expert opinion on therapeutic targets* 2010, **14**(11):1247-1257.
48. Sarkar S, Dubaybo H, Ali S, Goncalves P, Kollepara SL, Sethi S, Philip PA, Li Y: **Down-regulation of miR-221 inhibits proliferation of pancreatic cancer cells through up-regulation of PTEN, p27kip1, p57kip2, and PUMA.** *American journal of cancer research* 2013, **3**(5):465.
49. Kim S, Park HK, Jung HY, Lee S-Y, Min K-W, Kim WY, Han HS, Kim WS, Hwang TS, Lim SD: **ERG immunohistochemistry as an endothelial marker for assessing lymphovascular invasion.** *Korean journal of pathology* 2013, **47**(4):355.
50. Ma J, Cheng L, Liu H, Zhang J, Shi Y, Zeng F, Miele L, H Sarkar F, Xia J, Wang Z: **Genistein down-regulates miR-223 expression in pancreatic cancer cells.** *Current drug targets* 2013, **14**(10):1150-1156.
51. Ciarrocchi A, Piana S, Valcavi R, Gardini G, Casali B: **Inhibitor of DNA binding-1 induces mesenchymal features and promotes invasiveness in thyroid tumour cells.** *European Journal of Cancer* 2011, **47**(6):934-945.
52. Zhang Y, Yan L-X, Wu Q-N, Du Z-M, Chen J, Liao D-Z, Huang M-Y, Hou J-H, Wu Q-L, Zeng M-S: **miR-125b is methylated and functions as a tumor suppressor by regulating the ETS1 proto-oncogene in human invasive breast cancer.** *Cancer research* 2011, **71**(10):3552-3562.
53. Kim K-R, Yoshizaki T, Miyamori H, Hasegawa K, Horikawa T, Furukawa M, Harada S, Seiki M, Sato H: **Transformation of Madin-Darby canine kidney (MDCK) epithelial cells by Epstein-Barr virus latent membrane protein 1 (LMP1) induces expression of Ets1 and invasive growth.** *Oncogene* 2000, **19**(14):1764.
54. Keklikoglou I, Koerner C, Schmidt C, Zhang J, Heckmann D, Shavinskaya A, Allgayer H, Gückel B, Fehm T, Schneeweiss A: **MicroRNA-520/373 family functions as a tumor suppressor in estrogen receptor negative breast cancer by targeting NF- $\kappa$ B and TGF- $\beta$  signaling pathways.** *Oncogene* 2012, **31**(37):4150.
55. Lichner Z, Saleh C, Subramaniam V, Seivwright A, Prud'homme GJ, Yousef GM: **miR-17 inhibition enhances the formation of kidney cancer spheres with stem cell/tumor initiating cell properties.** *Oncotarget* 2015, **6**(8):5567.
56. Kleer CG, Cao Q, Varambally S, Shen R, Ota I, Tomlins SA, Ghosh D, Sewalt RG, Otte AP, Hayes DF: **EZH2 is a marker of aggressive breast cancer and promotes neoplastic transformation of breast epithelial cells.** *Proceedings of the National Academy of Sciences* 2003, **100**(20):11606-11611.
57. Zhang J, Chen L, Han L, Shi Z, Zhang J, Pu P, Kang C: **EZH2 is a negative prognostic factor and exhibits pro-oncogenic activity in glioblastoma.** *Cancer letters* 2015, **356**(2):929-936.
58. Miki Y, Swensen J, Shattuck-Eidens D, Futreal PA, Harshman K, Tavtigian S, Liu Q, Cochran C, Bennett LM, Ding W: **A strong candidate for the breast and ovarian cancer susceptibility gene BRCA1.** *Science* 1994, **266**(5182):66-71.
59. Rasmussen RD, Gajjar MK, Tuckova L, Jensen KE, Maya-Mendoza A, Holst CB, Møllgaard K, Rasmussen JS, Brennum J, Bartek Jr J: **BRCA1-regulated RRM2**

- expression protects glioblastoma cells from endogenous replication stress and promotes tumorigenicity.** *Nature communications* 2016, 7:13398.
60. Bao B, Ali S, Banerjee S, Wang Z, Logna F, Azmi AS, Kong D, Ahmad A, Li Y, Padhye S: **Curcumin analogue CDF inhibits pancreatic tumor growth by switching on suppressor microRNAs and attenuating EZH2 expression.** *Cancer research* 2012, 72(1):335-345.
61. Carvalho J, van Grieken NC, Pereira PM, Sousa S, Tijssen M, Buffart TE, Diosdado B, Grabsch H, Santos MA, Meijer G: **Lack of microRNA-101 causes E-cadherin functional deregulation through EZH2 up-regulation in intestinal gastric cancer.** *The Journal of pathology* 2012, 228(1):31-44.
62. Xi H, Blanck G: **Interferon regulatory factor-2 point mutations in human pancreatic tumors.** *International journal of cancer* 2000, 87(6):803-808.
63. Satoh A, Toyota M, Ikeda H, Morimoto Y, Akino K, Mita H, Suzuki H, Sasaki Y, Kanaseki T, Takamura Y: **Epigenetic inactivation of class II transactivator (CIITA) is associated with the absence of interferon- $\gamma$ -induced HLA-DR expression in colorectal and gastric cancer cells.** *Oncogene* 2004, 23(55):8876.
64. Ren Y, Chen Y, Liang X, Lu Y, Pan W, Yang M: **MiRNA-638 promotes autophagy and malignant phenotypes of cancer cells via directly suppressing DACT3.** *Cancer letters* 2017, 390:126-136.
65. Fussbroich B, Wagener N, Macher-Goeppinger S, Benner A, Fälth M, Sültmann H, Holzer A, Hoppe-Seyler K, Hoppe-Seyler F: **EZH2 depletion blocks the proliferation of colon cancer cells.** *PloS one* 2011, 6(7):e21651.
66. Zhang Z, Zhang B, Li W, Fu L, Fu L, Zhu Z, Dong J-T: **Epigenetic silencing of miR-203 upregulates SNAI2 and contributes to the invasiveness of malignant breast cancer cells.** *Genes & cancer* 2011, 2(8):782-791.
67. Larriba MJ, Bonilla F, Muñoz A: **The transcription factors Snail1 and Snail2 repress vitamin D receptor during colon cancer progression.** *The Journal of steroid biochemistry and molecular biology* 2010, 121(1-2):106-109.
68. Scheiber MN, Watson PM, Rumboldt T, Stanley C, Wilson RC, Findlay VJ, Anderson PE, Watson DK: **FLI1 expression is correlated with breast cancer cellular growth, migration, and invasion and altered gene expression.** *Neoplasia* 2014, 16(10):801-813.
69. Zhang J, Guo H, Zhang H, Wang H, Qian G, Fan X, Hoffman AR, Hu JF, Ge S: **Putative tumor suppressor miR-145 inhibits colon cancer cell growth by targeting oncogene friend leukemia virus integration 1 gene.** *Cancer* 2011, 117(1):86-95.
70. Pandey DP, Lappano R, Albanito L, Madeo A, Maggiolini M, Picard D: **Estrogenic GPR30 signalling induces proliferation and migration of breast cancer cells through CTGF.** *The EMBO journal* 2009, 28(5):523-532.
71. Ladwa R, Pringle H, Kumar R, West K: **Expression of CTGF and Cyr61 in colorectal cancer.** *Journal of clinical pathology* 2011, 64(1):58-64.
72. Rahman MA, Amin AR, Wang X, Zuckerman JE, Choi CHJ, Zhou B, Wang D, Nannapaneni S, Koenig L, Chen Z: **Systemic delivery of siRNA nanoparticles targeting RRM2 suppresses head and neck tumor growth.** *Journal of controlled release* 2012, 159(3):384-392.
73. Bornstein S, White R, Malkoski S, Oka M, Han G, Cleaver T, Reh D, Andersen P, Gross



- N, Olson S: **Smad4 loss in mice causes spontaneous head and neck cancer with increased genomic instability and inflammation.** *The Journal of clinical investigation* 2009, **119**(11):3408-3419.
74. He J, Mai J, Li Y, Chen L, Xu H, Zhu X, Pan Q: **miR-597 inhibits breast cancer cell proliferation, migration and invasion through FOSL2.** *Oncology reports* 2017, **37**(5):2672-2678.
75. Asting AG, Carén H, Andersson M, Lönnroth C, Lagerstedt K, Lundholm K: **COX-2 gene expression in colon cancer tissue related to regulating factors and promoter methylation status.** *BMC cancer* 2011, **11**(1):238.
76. Tran TH, Utama FE, Lin J, Yang N, Sjolund AB, Ryder A, Johnson KJ, Neilson LM, Liu C, Brill KL: **Prolactin inhibits BCL6 expression in breast cancer through a Stat5a-dependent mechanism.** *Cancer research* 2010, **70**(4):1711-1721.
77. Moos PJ, Edes K, Mullally JE, Fitzpatrick FA: **Curcumin impairs tumor suppressor p53 function in colon cancer cells.** *Carcinogenesis* 2004, **25**(9):1611-1617.
78. Kwok JM-M, Peck B, Monteiro LJ, Schwenen HD, Millour J, Coombes RC, Myatt SS, Lam EW-F: **FOXO1 confers acquired cisplatin resistance in breast cancer cells.** *Molecular cancer research* 2010, **8**(1):24-34.
79. Gong A, Huang S: **FoxO1 and Wnt/ $\beta$ -catenin signaling in glioma stem cells.** *Cancer research* 2012, **72**(22):5658-5662.
80. Xu X-S, Miao R-C, Wan Y, Zhang L-Q, Qu K, Liu C: **FoxO1 as a novel therapeutic target for cancer drug therapy.** *Asian Pac J Cancer Prev* 2015, **16**(1):23-29.
81. Ding K, Li W, Zou Z, Zou X, Wang C: **CCNB1 is a prognostic biomarker for ER+ breast cancer.** *Medical hypotheses* 2014, **83**(3):359-364.
82. Ajeawung NF, Faure R, Jones C, Kamnasaran D: **Preclinical evaluation of dipotassium bisperoxo (picolinate) oxovanadate V for the treatment of pediatric low-grade gliomas.** *Future Oncology* 2013, **9**(8):1215-1229.
83. Song R, Yao X, Shi L, Ren Y, Zhao H: **Effects of dietary selenium on apoptosis of germ cells in the testis during spermatogenesis in roosters.** *Theriogenology* 2015, **84**(4):583-588.
84. Li J, Yang L, Song L, Xiong H, Wang L, Yan X, Yuan J, Wu J, Li M: **Astrocyte elevated gene-1 is a proliferation promoter in breast cancer via suppressing transcriptional factor FOXO1.** *Oncogene* 2009, **28**(36):3188.
85. Li Z-C, Zhang L-M, Wang H-B, Ma J-X, Sun J-Z: **RETRACTED ARTICLE: Curcumin inhibits lung cancer progression and metastasis through induction of FOXO1.** *Tumor Biology* 2014, **35**(1):111-116.
86. Jørgensen A, Jensen MB, Nielsen JE, Juul A, Rajpert-De Meyts E: **Influence of vitamin D on cisplatin sensitivity in testicular germ cell cancer-derived cell lines and in a NTERA2 xenograft model.** *The Journal of steroid biochemistry and molecular biology* 2013, **136**:238-246.
87. Stojadinovic A, Hooke JA, Shriver CD, Nissan A, Kovatich AJ, Kao T-C, Ponniah S, Peoples GE, Moroni M: **HYOU1/Orp150 expression in breast cancer.** *Medical Science Monitor* 2007, **13**(11):BR231-BR239.
88. Yoshida Y, Yamashita T, Nagano K, Imai S, Nabeshi H, Yoshikawa T, Yoshioka Y, Abe Y, Kamada H, Tsutsumi Y: **Limited expression of reticulocalbin-1 in lymphatic**

- endothelial cells in lung tumor but not in normal lung.** *Biochemical and biophysical research communications* 2011, **405**(4):610-614.
89. Zhou L, Yin B, Liu Y, Hong Y, Zhang C, Fan J: **Mechanism and function of decreased FOXO1 in renal cell carcinoma.** *Journal of surgical oncology* 2012, **105**(8):841-847.
90. Shen L, O'Shea JM, Kaadige MR, Cunha S, Wilde BR, Cohen AL, Welm AL, Ayer DE: **Metabolic reprogramming in triple-negative breast cancer through Myc suppression of TXNIP.** *Proceedings of the National Academy of Sciences* 2015, **112**(17):5425-5430.
91. Zhou J, Yu Q, Chng W-J: **TXNIP (VDUP-1, TBP-2): a major redox regulator commonly suppressed in cancer by epigenetic mechanisms.** *The international journal of biochemistry & cell biology* 2011, **43**(12):1668-1673.
92. Yan W, Cao QJ, Arenas RB, Bentley B, Shao R: **GATA3 inhibits breast cancer metastasis through the reversal of epithelial-mesenchymal transition.** *Journal of Biological Chemistry* 2010, **285**(18):14042-14051.
93. Peters I, Dubrowskaja N, Tezval H, Kramer MW, von Klot CA, Hennenlotter J, Stenzl A, Scherer R, Kuczyk MA, Serth J: **Decreased mRNA expression of GATA1 and GATA2 is associated with tumor aggressiveness and poor outcome in clear cell renal cell carcinoma.** *Targeted oncology* 2015, **10**(2):267-275.
94. Chen Q, Zhang XH-F, Massagué J: **Macrophage binding to receptor VCAM-1 transmits survival signals in breast cancer cells that invade the lungs.** *Cancer cell* 2011, **20**(4):538-549.
95. Blann A, Gurney D, Wadley M, Bareford D, Stonelake P, Lip G: **Increased soluble P-selectin in patients with haematological and breast cancer: a comparison with fibrinogen, plasminogen activator inhibitor and von Willebrand factor.** *Blood coagulation & fibrinolysis* 2001, **12**(1):43-50.
96. Atrih A, Mudaliar M, Zakikhani P, Lamont D, Huang JT, Bray S, Barton G, Fleming S, Nabi G: **Quantitative proteomics in resected renal cancer tissue for biomarker discovery and profiling.** *British journal of cancer* 2014, **110**(6):1622.
97. Wu M-Y, Fu J, Xiao X, Wu J, Wu R-C: **MiR-34a regulates therapy resistance by targeting HDAC1 and HDAC7 in breast cancer.** *Cancer letters* 2014, **354**(2):311-319.
98. Lin Y-C, Lin Y-C, Shih J-Y, Huang W-J, Chao S-W, Chang Y-L, Chen C-C: **DUSP1 Expression Induced by HDAC1 Inhibition Mediates Gefitinib Sensitivity in Non-Small Cell Lung Cancers.** *Clinical Cancer Research* 2015, **21**(2):428-438.
99. Li Y, Miao L-Y, Xiao Y-L, Huang M, Yu M, Meng K, Cai H-R: **Hypoxia induced high expression of thioredoxin interacting protein (TXNIP) in non-small cell lung cancer and its prognostic effect.** *Asian Pac J Cancer Prev* 2015, **16**(7):2953-2958.
100. Müller BM, Jana L, Kasajima A, Lehmann A, Prinzler J, Budczies J, Winzer K-J, Diétel M, Weichert W, Denkert C: **Differential expression of histone deacetylases HDAC1, 2 and 3 in human breast cancer-overexpression of HDAC2 and HDAC3 is associated with clinicopathological indicators of disease progression.** *BMC cancer* 2013, **13**(1):215.
101. Zhu P, Martin E, Mengwasser J, Schlag P, Janssen K-P, Göttlicher M: **Induction of HDAC2 expression upon loss of APC in colorectal tumorigenesis.** *Cancer cell* 2004, **5**(5):455-463.
102. Hong J, Zhou J, Fu J, He T, Qin J, Wang L, Liao L, Xu J: **Phosphorylation of serine 68**

- of Twist1 by MAPKs stabilizes Twist1 protein and promotes breast cancer cell invasiveness. *Cancer research* 2011, **71**(11):3980-3990.
103. Gomez I, Peña C, Herrera M, Muñoz C, Larriba MJ, Garcia V, Dominguez G, Silva J, Rodriguez R, de Herreros AG: **TWIST1 is expressed in colorectal carcinomas and predicts patient survival.** *PloS one* 2011, **6**(3):e18023.
104. Chen X, Yun J, Fei F, Yi J, Tian R, Li S, Gan X: **Prognostic value of nuclear hepatoma-derived growth factor (HDGF) localization in patients with breast cancer.** *Pathology-Research and Practice* 2012, **208**(8):437-443.
105. Guo H, Li W, Zheng T, Liu Z: **MiR-195 targets HDGF to inhibit proliferation and invasion of NSCLC cells.** *Tumor Biology* 2014, **35**(9):8861-8866.
106. Wang YY, Kuhajda FP, Li JN, Pizer ES, Han WF, Sokoll LJ, Chan DW: **Fatty acid synthase (FAS) expression in human breast cancer cell culture supernatants and in breast cancer patients.** *Cancer letters* 2001, **167**(1):99-104.
107. Kornmann M, Ishiwata T, Kleeff J, Beger HG, Korc M: **Fas and Fas-ligand expression in human pancreatic cancer.** *Annals of surgery* 2000, **231**(3):368.
108. Pino I, Pio R, Toledo G, Zabalegui N, Vicent S, Rey N, Lozano MD, Torre W, Garcia-Foncillas J, Montuenga LM: **Altered patterns of expression of members of the heterogeneous nuclear ribonucleoprotein (hnRNP) family in lung cancer.** *Lung cancer* 2003, **41**(2):131-143.
109. Chaker S, Kashat L, Voisin S, Kaur J, Kak I, MacMillan C, Ozcelik H, Michael Siu K, Ralhan R, Walfish PG: **Secretome proteins as candidate biomarkers for aggressive thyroid carcinomas.** *Proteomics* 2013, **13**(5):771-787.
110. Yoshizawa A, Fukuoka J, Shimizu S, Shilo K, Franks TJ, Hewitt SM, Fujii T, Cordon-Cardo C, Jen J, Travis WD: **Overexpression of phospho-eIF4E is associated with survival through AKT pathway in non-small cell lung cancer.** *Clinical Cancer Research* 2010, **16**(1):240-248.
111. Manfredi GI, Dicitore A, Gaudenzi G, Caraglia M, Persani L, Vitale G: **PI3K/Akt/mTOR signaling in medullary thyroid cancer: a promising molecular target for cancer therapy.** *Endocrine* 2015, **48**(2):363-370.
112. Heyn H, Carmona FJ, Gomez A, Ferreira HJ, Bell JT, Sayols S, Ward K, Stefansson OA, Moran S, Sandoval J: **DNA methylation profiling in breast cancer discordant identical twins identifies DOK7 as novel epigenetic biomarker.** *Carcinogenesis* 2012, **34**(1):102-108.
113. Herreros-Villanueva M, Bujanda L: **Non-invasive biomarkers in pancreatic cancer diagnosis: what we need versus what we have.** *Annals of translational medicine* 2016, **4**(7).
114. Wang C, Zheng X, Shen C, Shi Y: **MicroRNA-203 suppresses cell proliferation and migration by targeting BIRC5 and LASP1 in human triple-negative breast cancer cells.** *Journal of experimental & clinical cancer research* 2012, **31**(1):58.
115. Glienke W, Maute L, Wicht J, Bergmann L: **Curcumin inhibits constitutive STAT3 phosphorylation in human pancreatic cancer cell lines and downregulation of survivin/BIRC5 gene expression.** *Cancer investigation* 2009, **28**(2):166-171.
116. Meyer MA, Baer JM, Knolhoff BL, Nywening TM, Panni RZ, Su X, Weilbaecher KN, Hawkins WG, Ma C, Fields RC: **Breast and pancreatic cancer interrupt IRF8-**

- dependent dendritic cell development to overcome immune surveillance.** *Nature communications* 2018, **9**(1):1250.
117. Melillo RM, Castellone MD, Guarino V, De Falco V, Cirafici AM, Salvatore G, Caiazzo F, Basolo F, Giannini R, Kruhoffer M: **The RET/PTC-RAS-BRAF linear signaling cascade mediates the motile and mitogenic phenotype of thyroid cancer cells.** *The Journal of clinical investigation* 2005, **115**(4):1068-1081.
118. Dallal RM, Christakos P, Lee K, Egawa S, Son Y-I, Lotze MT: **Paucity of dendritic cells in pancreatic cancer.** *Surgery* 2002, **131**(2):135-138.
119. Herrmann G, Schumm-Draeger P-M, Müller C, Atai E, Wenzel B, Fabian T, Usadel KH, Hübner K: **T lymphocytes, CD68-positive cells and vascularisation in thyroid carcinomas.** *Journal of cancer research and clinical oncology* 1994, **120**(11):651-656.
120. Zhang G, Zhang W, Li B, Stringer-Reasor E, Chu C, Sun L, Bae S, Chen D, Wei S, Jiao K: **MicroRNA-200c and microRNA-141 are regulated by a FOXP3-KAT2B axis and associated with tumor metastasis in breast cancer.** *Breast Cancer Research* 2017, **19**(1):73.
121. Zhao Y, Liu X, Zhong L, He M, Chen S, Wang T, Ma S: **The combined use of miRNAs and mRNAs as biomarkers for the diagnosis of papillary thyroid carcinoma.** *International journal of molecular medicine* 2015, **36**(4):1097-1103.
122. Deckers M, van Dinther M, Buijs J, Que I, Löwik C, van der Pluijm G, ten Dijke P: **The tumor suppressor Smad4 is required for transforming growth factor  $\beta$ -induced epithelial to mesenchymal transition and bone metastasis of breast cancer cells.** *Cancer research* 2006, **66**(4):2202-2209.
123. Geraldo M, Yamashita A, Kimura E: **MicroRNA miR-146b-5p regulates signal transduction of TGF- $\beta$  by repressing SMAD4 in thyroid cancer.** *Oncogene* 2012, **31**(15):1910.
124. Ansari D, Andersson R, Bauden MP, Andersson B, Connolly JB, Welinder C, Sasor A, Marko-Varga G: **Protein deep sequencing applied to biobank samples from patients with pancreatic cancer.** *Journal of cancer research and clinical oncology* 2015, **141**(2):369-380.
125. Chaffer CL, Marjanovic ND, Lee T, Bell G, Kleer CG, Reinhardt F, D'Alessio AC, Young RA, Weinberg RA: **Poised chromatin at the ZEB1 promoter enables breast cancer cell plasticity and enhances tumorigenicity.** *Cell* 2013, **154**(1):61-74.
126. Krebs AM, Mitschke J, Losada ML, Schmalhofer O, Boerries M, Busch H, Boettcher M, Mougiakakos D, Reichardt W, Bronsert P: **The EMT-activator Zeb1 is a key factor for cell plasticity and promotes metastasis in pancreatic cancer.** *Nature cell biology* 2017, **19**(5):518.
127. Yu F, Li J, Chen H, Fu J, Ray S, Huang S, Zheng H, Ai W: **Kruppel-like factor 4 (KLF4) is required for maintenance of breast cancer stem cells and for cell migration and invasion.** *Oncogene* 2011, **30**(18):2161.
128. Carina V, Zito G, Pizzolanti G, Richiusa P, Criscimanna A, Rodolico V, Tomasello L, Pitrone M, Arancio W, Giordano C: **Multiple pluripotent stem cell markers in human anaplastic thyroid cancer: the putative upstream role of SOX2.** *Thyroid* 2013, **23**(7):829-837.
129. Iliopoulos D, Hirsch HA, Wang G, Struhl K: **Inducible formation of breast cancer stem**

- cells and their dynamic equilibrium with non-stem cancer cells via IL6 secretion.** *Proceedings of the National Academy of Sciences* 2011, **108**(4):1397-1402.
130. Lumachi F, Basso SM, Orlando R: **Cytokines, thyroid diseases and thyroid cancer.** *Cytokine* 2010, **50**(3):229-233.
131. Guo H, Lin Y, Zhang H, Liu J, Zhang N, Li Y, Kong D, Tang Q, Ma D: **Tissue factor pathway inhibitor-2 was repressed by CpG hypermethylation through inhibition of KLF6 binding in highly invasive breast cancer cells.** *BMC molecular biology* 2007, **8**(1):110.
132. Spinola M, Leoni VP, Galvan A, Korsching E, Conti B, Pastorino U, Ravagnani F, Columbano A, Skaug V, Haugen A: **Genome-wide single nucleotide polymorphism analysis of lung cancer risk detects the KLF6 gene.** *Cancer letters* 2007, **251**(2):311-316.
133. Hugo H, Cures A, Suraweera N, Drabsch Y, Purcell D, Mantamadiotis T, Phillips W, Dobrovic A, Zupi G, Gonda TJ: **Mutations in the MYB intron I regulatory sequence increase transcription in colon cancers.** *Genes, Chromosomes and Cancer* 2006, **45**(12):1143-1154.
134. Liang J, Liu X, Xue H, Qiu B, Wei B, Sun K: **MicroRNA-103a inhibits gastric cancer cell proliferation, migration and invasion by targeting c-Myb.** *Cell proliferation* 2015, **48**(1):78-85.
135. Suhovskih AV, Aidagulova SV, Kashuba VI, Grigorieva EV: **Proteoglycans as potential microenvironmental biomarkers for colon cancer.** *Cell and tissue research* 2015, **361**(3):833-844.
136. Li J, Ding Y, Li A: **Identification of COL1A1 and COL1A2 as candidate prognostic factors in gastric cancer.** *World journal of surgical oncology* 2016, **14**(1):297.
137. Shi H, Bevier M, Johansson R, Enquist-Olsson K, Henriksson R, Hemminki K, Lenner P, Försti A: **Prognostic impact of polymorphisms in the MYBL2 interacting genes in breast cancer.** *Breast cancer research and treatment* 2012, **131**(3):1039-1047.
138. Buffart TE, van Grieken NC, Tijssen M, Coffa J, Ylstra B, Grabsch HI, van de Velde CJ, Carvalho B, Meijer GA: **High resolution analysis of DNA copy-number aberrations of chromosomes 8, 13, and 20 in gastric cancers.** *Virchows Archiv* 2009, **455**(3):213-223.
139. Helleman J, Jansen MP, Ruigrok-Ritstier K, van Staveren IL, Look MP, Meijer-van Gelder ME, Sieuwerts AM, Klijn JG, Sleijfer S, Foekens JA: **Association of an extracellular matrix gene cluster with breast cancer prognosis and endocrine therapy response.** *Clinical cancer research* 2008, **14**(17):5555-5564.
140. Landi S, Moreno V, Gioia-Patricola L, Guino E, Navarro M, de Oca J, Capella G, Canzian F: **Association of common polymorphisms in inflammatory genes interleukin (IL) 6, IL8, tumor necrosis factor  $\alpha$ , NFKB1, and peroxisome proliferator-activated receptor  $\gamma$  with colorectal cancer.** *Cancer research* 2003, **63**(13):3560-3566.
141. Wang X, Peng H, Liang Y, Sun R, Wei T, Li Z, Gong Y, Gong R, Liu F, Zhang L: **A functional insertion/deletion polymorphism in the promoter region of the NFKB1 gene increases the risk of papillary thyroid carcinoma.** *Genetic testing and molecular biomarkers* 2015, **19**(3):167-171.
142. Lerebours F, Vacher S, Andrieu C, Espie M, Marty M, Lidereau R, Bieche I: **NF-kappa B genes have a major role in inflammatory breast cancer.** *BMC cancer* 2008, **8**(1):41.

143. Curran JE, Weinstein SR, Griffiths LR: **Polymorphic variants of NFKB1 and its inhibitory protein NFKBIA, and their involvement in sporadic breast cancer.** *Cancer letters* 2002, **188**(1-2):103-107.
144. Lu Z, Li Y, Takwi A, Li B, Zhang J, Conklin DJ, Young KH, Martin R, Li Y: **miR-301a as an NF- $\kappa$ B activator in pancreatic cancer cells.** *The EMBO journal* 2011, **30**(1):57-67.
145. Denz A, Pilarsky C, Muth D, Rückert F, Saeger H-D, Grützmann R: **Inhibition of MIF leads to cell cycle arrest and apoptosis in pancreatic cancer cells.** *Journal of Surgical Research* 2010, **160**(1):29-34.
146. Lunardi S, Jamieson NB, Lim SY, Griffiths KL, Carvalho-Gaspar M, Al-Assar O, Yameen S, Carter RC, McKay CJ, Spoletini G: **IP-10/CXCL10 induction in human pancreatic cancer stroma influences lymphocytes recruitment and correlates with poor survival.** *Oncotarget* 2014, **5**(22):11064.
147. Cunha LL, Morari EC, Guihen ACT, Razolli D, Gerhard R, Nonogaki S, Soares FA, Vassallo J, Ward LS: **Infiltration of a mixture of different immune cells may be related to molecular profile of differentiated thyroid cancer.** *Endocrine-related cancer* 2012, **19**(3):L31-L36.
148. Medina PP, Carretero J, Ballestar E, Angulo B, Lopez-Rios F, Esteller M, Sanchez-Cespedes M: **Transcriptional targets of the chromatin-remodelling factor SMARCA4/BRG1 in lung cancer cells.** *Human molecular genetics* 2005, **14**(7):973-982.
149. McDade TP, Perugini RA, Vittimberga Jr FJ, Carrigan RC, Callery MP: **Salicylates inhibit NF- $\kappa$ B activation and enhance TNF- $\alpha$ -induced apoptosis in human pancreatic cancer cells.** *Journal of Surgical Research* 1999, **83**(1):56-61.
150. Tantai J, Hu D, Yang Y, Geng J: **Combined identification of long non-coding RNA XIST and HIF1A-AS1 in serum as an effective screening for non-small cell lung cancer.** *International journal of clinical and experimental pathology* 2015, **8**(7):7887.
151. Hoffmann A-C, Mori R, Vallbohmer D, Brabender J, Klein E, Drebber U, Baldus SE, Cooc J, Azuma M, Metzger R: **High expression of HIF1a is a predictor of clinical outcome in patients with pancreatic ductal adenocarcinomas and correlated to PDGFA, VEGF, and bFGF.** *Neoplasia* 2008, **10**(7):674-679.
152. Verjans E, Noetzel E, Bektas N, Schütz AK, Lue H, Lennartz B, Hartmann A, Dahl E, Bernhagen J: **Dual role of macrophage migration inhibitory factor (MIF) in human breast cancer.** *BMC cancer* 2009, **9**(1):230.
153. Pan Z, Li L, Fang Q, Qian Y, Zhang Y, Zhu J, Ge M, Huang P: **Integrated Bioinformatics Analysis of Master Regulators in Anaplastic Thyroid Carcinoma.** *BioMed research international* 2019, **2019**.
154. Mihály Z, Kormos M, Lániczky A, Dank M, Budczies J, Szász MA, Györfy B: **A meta-analysis of gene expression-based biomarkers predicting outcome after tamoxifen treatment in breast cancer.** *Breast cancer research and treatment* 2013, **140**(2):219-232.
155. Sanchez-Alvarez R, Martinez-Outschoorn UE, Lin Z, Lamb R, Hult J, Howell A, Sotgia F, Rubin E, Lisanti MP: **Ethanol exposure induces the cancer-associated fibroblast phenotype and lethal tumor metabolism: implications for breast cancer prevention.** *Cell Cycle* 2013, **12**(2):289-301.
156. Zhu W, Li C, Ai Z: **Candidate agents for papillary thyroid cancer identified by gene**

- expression analysis.** *Pathology & Oncology Research* 2013, **19**(3):597-604.
157. Walker GE, Wilson EM, Powell D, Oh Y: **Butyrate, a histone deacetylase inhibitor, activates the human IGF binding protein-3 promoter in breast cancer cells: molecular mechanism involves an Sp1/Sp3 multiprotein complex.** *Endocrinology* 2001, **142**(9):3817-3827.
158. Chintharlapalli S, Papineni S, Lee SO, Lei P, Jin UH, Sherman SI, Santarpia L, Safe S: **Inhibition of pituitary tumor-transforming gene-1 in thyroid cancer cells by drugs that decrease specificity proteins.** *Molecular carcinogenesis* 2011, **50**(9):655-667.
159. Pan D, Kocherginsky M, Conzen SD: **Activation of the glucocorticoid receptor is associated with poor prognosis in estrogen receptor-negative breast cancer.** *Cancer research* 2011, **71**(20):6360-6370.
160. Dom G, Frank S, Floor S, Kehagias P, Libert F, Hoang C, Andry G, Spinette A, Craciun L, de Saint Aubin N: **Thyroid follicular adenomas and carcinomas: molecular profiling provides evidence for a continuous evolution.** *Oncotarget* 2018, **9**(12):10343.
161. Farmer P, Bonnefoi H, Anderle P, Cameron D, Wirapati P, Becette V, André S, Piccart M, Campone M, Brain E: **A stroma-related gene signature predicts resistance to neoadjuvant chemotherapy in breast cancer.** *Nature medicine* 2009, **15**(1):68.
162. Paricharttanakul NM, Saharat K, Chokchaichamnankit D, Punyarit P, Srisomsap C, Svasti J: **Unveiling a novel biomarker panel for diagnosis and classification of well-differentiated thyroid carcinomas.** *Oncology reports* 2016, **35**(4):2286-2296.
163. O'shaughnessy J, Osborne C, Pippen J, Yoffe M, Patt D, Monaghan G, Rocha C, Ossovskaya V, Sherman B, Bradley C: **Efficacy of BSI-201, a poly (ADP-ribose) polymerase-1 (PARP1) inhibitor, in combination with gemcitabine/carboplatin (G/C) in patients with metastatic triple-negative breast cancer (TNBC): results of a randomized phase II trial.** *Journal of Clinical Oncology* 2009, **27**(18\_suppl):3-3.
164. Usanova S, Piée-Staffa A, Sied U, Thomale J, Schneider A, Kaina B, Köberle B: **Cisplatin sensitivity of testis tumour cells is due to deficiency in interstrand-crosslink repair and low ERCC1-XPF expression.** *Molecular cancer* 2010, **9**(1):248.
165. Cierna Z, Mego M, Jurisica I, Machalekova K, Chovanec M, Miskovska V, Svetlovska D, Kalavska K, Rejlekova K, Kajo K: **Fibrillin-1 (FBN-1) a new marker of germ cell neoplasia in situ.** *BMC cancer* 2016, **16**(1):597.
166. Watson JL, Hill R, Yaffe PB, Greenshields A, Walsh M, Lee PW, Giacomantonio CA, Hoskin DW: **Curcumin causes superoxide anion production and p53-independent apoptosis in human colon cancer cells.** *Cancer letters* 2010, **297**(1):1-8.
167. Vecchi M, Confalonieri S, Nuciforo P, Vigano M, Capra M, Bianchi M, Nicosia D, Bianchi F, Galimberti V, Viale G: **Breast cancer metastases are molecularly distinct from their primary tumors.** *Oncogene* 2008, **27**(15):2148.
168. Gardina PJ, Clark TA, Shimada B, Staples MK, Yang Q, Veitch J, Schweitzer A, Awad T, Sugnet C, Dee S: **Alternative splicing and differential gene expression in colon cancer detected by a whole genome exon array.** *BMC genomics* 2006, **7**(1):325.
169. Yoshimura K, Takeuchi K, Nagasaki K, Ogishima S, Tanaka H, Iwase T, Akiyama F, Kuroda Y, Miki Y: **Prognostic value of matrix Gla protein in breast cancer.** *Molecular medicine reports* 2009, **2**(4):549-553.
170. Deng L, Shang Y, Guo S, Liu C, Zhou L, Sun Y, Nie Y, Fan D, Lu Y, Guo X: **Ran GTPase**

- protein promotes metastasis and invasion in pancreatic cancer by deregulating the expression of AR and CXCR4.** *Cancer biology & therapy* 2014, **15**(8):1087-1093.
171. Zhang F, Li H, Pendleton AR, Robison JG, Monson KO, Murray BK, O'Neill KL: **Thymidine kinase 1 immunoassay: a potential marker for breast cancer.** *Cancer detection and prevention* 2001, **25**(1):8-15.
172. Paproski RJ, Young JD, Cass CE: **Predicting gemcitabine transport and toxicity in human pancreatic cancer cell lines with the positron emission tomography tracer 3'-deoxy-3'-fluorothymidine.** *Biochemical pharmacology* 2010, **79**(4):587-595.
173. Wang P, Chen D, Ma H, Li Y: **LncRNA MEG3 enhances cisplatin sensitivity in non-small cell lung cancer by regulating miR-21-5p/SOX7 axis.** *Oncotargets and therapy* 2017, **10**:5137.
174. Xu SH, Huang JZ, Xu ML, Yu G, Yin XF, Chen D, Yan GR: **ACK1 promotes gastric cancer epithelial-mesenchymal transition and metastasis through AKT-POU2F1-ECD signalling.** *The Journal of pathology* 2015, **236**(2):175-185.
175. Yano T, Tanikawa S, Fujie T, Masutani M, Horie T: **Vascular endothelial growth factor expression and neovascularisation in non-small cell lung cancer.** *European Journal of Cancer* 2000, **36**(5):601-609.
176. Ikeda M, Furukawa H, Imamura H, Shimizu J, Ishida H, Masutani S, Tatsuta M, Kawasaki T, Satomi T: **Surgery for gastric cancer increases plasma levels of vascular endothelial growth factor and von Willebrand factor.** *Gastric Cancer* 2002, **5**(3):0137-0141.
177. Golembesky AK, Gammon MD, North KE, Bensen JT, Schroeder JC, Teitelbaum SL, Neugut AI, Santella RM: **Peroxisome proliferator-activated receptor-alpha (PPARA) genetic polymorphisms and breast cancer risk: a Long Island ancillary study.** *Carcinogenesis* 2008, **29**(10):1944-1949.
178. FuÈhrer D: **A nuclear receptor in thyroid malignancy: is PAX8/PPARg the Holy Grail of follicular thyroid cancer?** *cancer* 2001, **3**:4.
179. Faryna M, Konermann C, Aulmann S, Bermejo JL, Brugger M, Diederichs S, Rom J, Weichenhan D, Claus R, Rehli M: **Genome-wide methylation screen in low-grade breast cancer identifies novel epigenetically altered genes as potential biomarkers for tumor diagnosis.** *The FASEB Journal* 2012, **26**(12):4937-4950.
180. Chang C-C, Chang Y-S, Huang H-Y, Yeh K-T, Liu T-C, Chang J-G: **Determination of the mutational landscape in Taiwanese patients with papillary thyroid cancer by whole-exome sequencing.** *Human pathology* 2018, **78**:151-158.
181. Hamann U, Herbold C, Costa S, Solomayer E-F, Kaufmann M, Bastert G, Ulmer HU, Frenzel H, Komitowski D: **Allelic imbalance on chromosome 13q: evidence for the involvement of BRCA2 and RB1 in sporadic breast cancer.** *Cancer research* 1996, **56**(9):1988-1990.
182. Takahashi C, Contreras B, Iwanaga T, Takegami Y, Bakker A, Bronson RT, Noda M, Loda M, Hunt JL, Ewen ME: **Nras loss induces metastatic conversion of Rb1-deficient neuroendocrine thyroid tumor.** *Nature genetics* 2006, **38**(1):118.
183. Ding S-I, Yu J-C, Chen S-T, Hsu G-C, Shen C-Y: **Genetic variation in the premature aging gene WRN: a case-control study on breast cancer susceptibility.** *Cancer Epidemiology and Prevention Biomarkers* 2007, **16**(2):263-269.
184. Vriens MR, Suh I, Moses W, Kebebew E: **Clinical features and genetic predisposition**



- to hereditary nonmedullary thyroid cancer.** *Thyroid* 2009, **19**(12):1343-1349.
185. Pan X, Arumugam T, Yamamoto T, Levin PA, Ramachandran V, Ji B, Lopez-Berestein G, Vivas-Mejia PE, Sood AK, McConkey DJ: **Nuclear factor- $\kappa$ B p65/relA silencing induces apoptosis and increases gemcitabine effectiveness in a subset of pancreatic cancer cells.** *Clinical Cancer Research* 2008, **14**(24):8143-8151.
186. Pacifico F, Leonardi A: **Role of NF- $\kappa$ B in thyroid cancer.** *Molecular and cellular endocrinology* 2010, **321**(1):29-35.
187. Tan AC, Jimeno A, Lin SH, Wheelhouse J, Chan F, Solomon A, Rajeshkumar N, Rubio-Viqueira B, Hidalgo M: **Characterizing DNA methylation patterns in pancreatic cancer genome.** *Molecular oncology* 2009, **3**(5-6):425-438.
188. Kourkoumpetis T, Royse KE, Chen L, Ravishankar M, Ittmann M, El-Serag HB, Jiao L: **Differential expression of tight junctions and cell polarity genes in human colon cancer.** *Exploratory Research and Hypothesis in Medicine* 2018, **3**(1):14-19.
189. Rauch TA, Wang Z, Wu X, Kernstine KH, Riggs AD, Pfeifer GP: **DNA methylation biomarkers for lung cancer.** *Tumor Biology* 2012, **33**(2):287-296.
190. Zhang H-Y, Jin L, Stilling GA, Ruebel KH, Coonse K, Tanizaki Y, Raz A, Lloyd RV: **RUNX1 and RUNX2 upregulate Galectin-3 expression in human pituitary tumors.** *Endocrine* 2009, **35**(1):101-111.
191. Wang H, Schmit SL, Haiman CA, Keku TO, Kato I, Palmer JR, van den Berg D, Wilkens LR, Burnett T, Conti DV: **Novel colon cancer susceptibility variants identified from a genome-wide association study in African Americans.** *International journal of cancer* 2017, **140**(12):2728-2733.
192. Tomoshige K, Matsumoto K, Tsuchiya T, Oikawa M, Miyazaki T, Yamasaki N, Mishima H, Kinoshita A, Kubo T, Fukushima K: **Germline mutations causing familial lung cancer.** *Journal of human genetics* 2015, **60**(10):597.
193. Javed A, Barnes GL, Pratap J, Antkowiak T, Gerstenfeld LC, Van Wijnen AJ, Stein JL, Lian JB, Stein GS: **Impaired intranuclear trafficking of Runx2 (AML3/CBFA1) transcription factors in breast cancer cells inhibits osteolysis in vivo.** *Proceedings of the National Academy of Sciences* 2005, **102**(5):1454-1459.
194. Niu D-F, Kondo T, Nakazawa T, Oishi N, Kawasaki T, Mochizuki K, Yamane T, Katoh R: **Transcription factor Runx2 is a regulator of epithelial–mesenchymal transition and invasion in thyroid carcinomas.** *Laboratory investigation* 2012, **92**(8):1181.
195. Azzam HS, Arand G, Lippman ME, Thompson EW: **Association of MMP-2 activation potential with metastatic progression in human breast cancer cell lines independent of MMP-2 production.** *JNCI: Journal of the National Cancer Institute* 1993, **85**(21):1758-1764.
196. Tian X, Cong M, Zhou W, Zhu J, Liu Q: **Relationship between protein expression of VEGF-C, MMP-2 and lymph node metastasis in papillary thyroid cancer.** *Journal of International Medical Research* 2008, **36**(4):699-703.
197. Sheu JJ, Lee C, Hua C, Li C, Lai M, Lee S, Cheng J, Chen C, Chan C, Chao SC: **LRIG1 modulates aggressiveness of head and neck cancers by regulating EGFR-MAPK-SPHK1 signaling and extracellular matrix remodeling.** *Oncogene* 2014, **33**(11):1375.
198. Gunasinghe ND, Wells A, Thompson EW, Hugo HJ: **Mesenchymal–epithelial transition (MET) as a mechanism for metastatic colonisation in breast cancer.** *Cancer and*

- Metastasis Reviews* 2012, **31**(3-4):469-478.
199. Seiwert TY, Jagadeeswaran R, Faoro L, Janamanchi V, Nallasura V, El Dinali M, Yala S, Kanteti R, Cohen EE, Lingen MW: **The MET receptor tyrosine kinase is a potential novel therapeutic target for head and neck squamous cell carcinoma.** *Cancer research* 2009, **69**(7):3021-3031.
  200. Overman J, Fontaine F, Moustaqil M, Mittal D, Sierecki E, Sacilotto N, Zuegg J, Robertson AA, Holmes K, Salim AA: **Pharmacological targeting of the transcription factor SOX18 delays breast cancer in mice.** *Elife* 2017, **6**:e21221.
  201. Jethon A, Pula B, Olbromski M, Werynska B, Muszczynska-Bernhard B, Witkiewicz W, Dziegiel P, Podhorska-Okolow M: **Prognostic significance of SOX18 expression in non-small cell lung cancer.** *International journal of oncology* 2015, **46**(1):123-132.
  202. Tóké A-M, Szász AM, Juhász É, Schaff Z, Harsányi L, Molnár IA, Baranyai Z, Besznyák I, Zaránd A, Salamon F: **Expression of tight junction molecules in breast carcinomas analysed by array PCR and immunohistochemistry.** *Pathology & Oncology Research* 2012, **18**(3):593-606.
  203. Paschoud S, Bongiovanni M, Pache J-C, Citi S: **Claudin-1 and claudin-5 expression patterns differentiate lung squamous cell carcinomas from adenocarcinomas.** *Modern pathology* 2007, **20**(9):947.
  204. Li X-L, Chen X-Q, Zhang M-N, Chen N, Nie L, Xu M, Gong J, Shen P-F, Su Z-Z, Weng X: **SOX9 was involved in TKIs resistance in renal cell carcinoma via Raf/MEK/ERK signaling pathway.** *International journal of clinical and experimental pathology* 2015, **8**(4):3871.
  205. Sun L, Mathews LA, Cabarcas SM, Zhang X, Yang A, Zhang Y, Young MR, Klarmann KD, Keller JR, Farrar WL: **Epigenetic regulation of SOX9 by the NF- $\kappa$ B signaling pathway in pancreatic cancer stem cells.** *Stem cells* 2013, **31**(8):1454-1466.
  206. Fergelot P, Bernhard J-C, Soulet F, Kilarski WW, Léon C, Courtois N, Deminière C, Herbert JM, Antczak P, Falciani F: **The experimental renal cell carcinoma model in the chick embryo.** *Angiogenesis* 2013, **16**(1):181-194.
  207. Schmielau J, Nalesnik MA, Finn OJ: **Suppressed T-cell receptor  $\zeta$  chain expression and cytokine production in pancreatic cancer patients.** *Clinical cancer research* 2001, **7**(3):933s-939s.
  208. Lin R-K, Wu C-Y, Chang J-W, Juan L-J, Hsu H-S, Chen C-Y, Lu Y-Y, Tang Y-A, Yang Y-C, Yang P-C: **Dysregulation of p53/Sp1 control leads to DNA methyltransferase-1 overexpression in lung cancer.** *Cancer research* 2010, **70**(14):5807-5817.
  209. Chiefari E, Brunetti A, Arturi F, Bidart J-M, Russo D, Schlumberger M, Filetti S: **Increased expression of AP2 and Sp1 transcription factors in human thyroid tumors: a role in NIS expression regulation?** *BMC cancer* 2002, **2**(1):35.
  210. Boonstra R, Timmer-Bosscha H, van Echten-Arends J, van der Kolk D, van Den Berg A, De Jong B, Tew K, Poppema S, De Vries E: **Mitoxantrone resistance in a small cell lung cancer cell line is associated with ABCA2 upregulation.** *British journal of cancer* 2004, **90**(12):2411.
  211. Kucerova L, Feketeova L, Kozovska Z, Poturnajova M, Matuskova M, Nencka R, Babal P: **In Vivo 5FU-Exposed Human Medullary Thyroid Carcinoma Cells Contain a Chemoresistant CD133+ Tumor-Initiating Cell Subset.** *Thyroid* 2014, **24**(3):520-532.

212. Krishnan V, Wang X, Safe S: **Estrogen receptor-Sp1 complexes mediate estrogen-induced cathepsin D gene expression in MCF-7 human breast cancer cells.** *Journal of Biological Chemistry* 1994, **269**(22):15912-15917.
213. Hu B, Meng X, Zhang Y, Hossain MM, Wu L, Zhang Y, Peng X, Zhang X: **Short hairpin RNA-mediated gene silencing of ADAM17 inhibits the growth of breast cancer MCF7 cells in vitro and in vivo and its mechanism of action.** *Oncol Rep* 2018, **39**(4):1640-1648.
214. Miccichè F, Da Riva L, Fabbi M, Pilotti S, Mondellini P, Ferrini S, Canevari S, Pierotti MA, Bongarzone I: **Activated leukocyte cell adhesion molecule expression and shedding in thyroid tumors.** *PLoS One* 2011, **6**(2):e17141.
215. Ahmed M, Rahman N: **ATM and breast cancer susceptibility.** *Oncogene* 2006, **25**(43):5906-5911.
216. Gu Y, Yu Y, Ai L, Shi J, Liu X, Sun H, Liu Y: **Association of the ATM gene polymorphisms with papillary thyroid cancer.** *Endocrine* 2014, **45**(3):454-461.
217. Zhao P, Ma W, Hu Z, Zang L, Tian Z, Zhang K: **Filamin A (FLNA) modulates chemosensitivity to docetaxel in triple-negative breast cancer through the MAPK/ERK pathway.** *Tumor Biology* 2016, **37**(4):5107-5115.
218. Uramoto H, Akyuerek LM, Hanagiri T: **A positive relationship between filamin and VEGF in patients with lung cancer.** *Anticancer research* 2010, **30**(10):3939-3944.
219. Kasaian K, Wiseman SM, Walker BA, Schein JE, Zhao Y, Hirst M, Moore RA, Mungall AJ, Marra MA, Jones SJ: **The genomic and transcriptomic landscape of anaplastic thyroid cancer: implications for therapy.** *BMC cancer* 2015, **15**(1):984.
220. Garrett PA, Hulka BS, Kim YL, Farber RA: **HRAS protooncogene polymorphism and breast cancer.** *Cancer Epidemiology and Prevention Biomarkers* 1993, **2**(2):131-138.
221. Schulten H-J, Al-Maghrabi J, Al-Ghamdi K, Salama S, Al-Muhayawi S, Chaudhary A, Hamour O, Abuzenadah A, Gari M, Al-Qahtani M: **Mutational screening of RET, HRAS, KRAS, NRAS, BRAF, AKT1, and CTNNB1 in medullary thyroid carcinoma.** *Anticancer research* 2011, **31**(12):4179-4183.
222. Mardente S, Mari E, Massimi I, Fico F, Faggioni A, Pulcinelli F, Antonaci A, Zicari A: **HMGB1-induced cross talk between PTEN and miRs 221/222 in thyroid cancer.** *BioMed research international* 2015, **2015**.
223. Gjerstorff MF, Benoit VM, Laenkholm A-V, Nielsen O, Johansen LE, Ditzel HJ: **Identification of genes with altered expression in medullary breast cancer vs. ductal breast cancer and normal breast epithelia.** *International journal of oncology* 2006, **28**(6):1327-1335.
224. Chakrabarti G: **Mutant KRAS associated malic enzyme 1 expression is a predictive marker for radiation therapy response in non-small cell lung cancer.** *Radiation Oncology* 2015, **10**(1):145.
225. Leo JC, Wang SM, Guo CH, Aw SE, Zhao Y, Li JM, Hui KM, Lin VC: **Gene regulation profile reveals consistent anticancer properties of progesterone in hormone-independent breast cancer cells transfected with progesterone receptor.** *International journal of cancer* 2005, **117**(4):561-568.
226. Straight AM, Oakley K, Moores R, Bauer AJ, Patel A, Tuttle RM, Jimeno J, Francis GL: **Aplidin reduces growth of anaplastic thyroid cancer xenografts and the expression**

- of several angiogenic genes.** *Cancer chemotherapy and pharmacology* 2006, **57**(1):7-14.
227. Dong X-Y, Guo P, Boyd J, Sun X, Li Q, Zhou W, Dong J-T: **Implication of snoRNA U50 in human breast cancer.** *Journal of genetics and genomics* 2009, **36**(8):447-454.
228. Li Y, Huang J, Zhao Y, He J, Wang W, Davies K, Nose V, Xiao S: **UTRN on chromosome 6q24 is mutated in multiple tumors.** *Oncogene* 2007, **26**(42):6220.
229. Zhang H, Gao P, Fukuda R, Kumar G, Krishnamachary B, Zeller KI, Dang CV, Semenza GL: **HIF-1 inhibits mitochondrial biogenesis and cellular respiration in VHL-deficient renal cell carcinoma by repression of C-MYC activity.** *Cancer cell* 2007, **11**(5):407-420.
230. Lin S-F, Yu Z, Riedl C, Woo Y, Zhang Q, Yong AY, Timiryasova T, Chen N, Shah JP, Szalay AA: **Treatment of anaplastic thyroid carcinoma in vitro with a mutant vaccinia virus.** *Surgery* 2007, **142**(6):976-983.
231. Williams SA, Riel-Mehan M, Ostroff RM: **Pancreatic Cancer Biomarkers and Uses Thereof.** In.: Google Patents; 2014.
232. Zou M, Baitei EY, BinEssa HA, Al-Mohanna FA, Parhar RS, St-Arnaud R, Kimura S, Pritchard C, Alzahrani AS, Assiri AM: **Cyp24a1 attenuation limits progression of BrafV600E-induced papillary thyroid cancer cells and sensitizes them to BRAFV600E inhibitor PLX4720.** *Cancer research* 2017, **77**(8):2161-2172.
233. Scott GK, Daniel JC, Xiong X, Maki RA, Kabat D, Benz CC: **Binding of an ETS-related protein within the DNase I hypersensitive site of the HER2/neu promoter in human breast cancer cells.** *Journal of Biological Chemistry* 1994, **269**(31):19848-19858.
234. Jiang H, Yang T, Lu P, Ma Y: **Gene expression profiling of gastric cancer.** *Eur Rev Med Pharmacol Sci* 2014, **18**(15):2109-2115.
235. Futagami S, Tatsuguchi A, Hiratsuka T, Shindo T, Horie A, Hamamoto T, Ueki N, Kusunoki M, Miyake K, Gudis K: **Monocyte chemoattractant protein 1 and CD40 ligation have a synergistic effect on vascular endothelial growth factor production through cyclooxygenase 2 upregulation in gastric cancer.** *Journal of gastroenterology* 2008, **43**(3):216-224.
236. Eissa S, Zaki SA, El-Maghraby SM, Kadry DY: **Importance of serum IL-18 and RANTES as markers for breast carcinoma progression.** *J Egypt Natl Canc Inst* 2005, **17**(1):51-55.
237. Abdolahi F, Dabbaghmanesh MH, Haghshenas MR, Ghaderi A, Erfani N: **A gene-disease association study of IL18 in thyroid cancer: genotype and haplotype analyses.** *Endocrine* 2015, **50**(3):698-707.
238. Blake ML, Tometsko M, Miller R, Jones JC, Dougall WC: **RANK expression on breast cancer cells promotes skeletal metastasis.** *Clinical & experimental metastasis* 2014, **31**(2):233-245.
239. Italiano D, Lena AM, Melino G, Candi E: **Identification of NCF2/p67phox as a novel p53 target gene.** *Cell cycle* 2012, **11**(24):4589-4596.
240. Khodarev N, Ahmad R, Rajabi H, Pitroda S, Kufe T, McClary C, Joshi MD, MacDermed D, Weichselbaum R, Kufe D: **Cooperativity of the MUC1 oncoprotein and STAT1 pathway in poor prognosis human breast cancer.** *Oncogene* 2010, **29**(6):920.
241. Hwang ES, Kim DW, Hwang JH, Jung HS, Suh JM, Park YJ, Chung HK, Song JH, Park KC, Park SH: **Regulation of signal transducer and activator of transcription 1**

- (STAT1) and STAT1-dependent genes by RET/PTC (rearranged in transformation/papillary thyroid carcinoma) oncogenic tyrosine kinases. *Molecular Endocrinology* 2004, **18**(11):2672-2684.
242. Fujieda S, Sugimoto C, Seki M, Sunaga H, Saito H: **CD40 stimulation inhibits cell growth and Fas-mediated apoptosis in a thyroid cancer cell line.** *Oncology Research Featuring Preclinical and Clinical Cancer Therapeutics* 1998, **10**(9):433-439.
243. Jiang Y-Z, Liu Y-R, Xu X-E, Jin X, Hu X, Yu K-D, Shao Z-M: **Transcriptome analysis of triple-negative breast cancer reveals an integrated mRNA-lncRNA signature with predictive and prognostic value.** *Cancer research* 2016, **76**(8):2105-2114.
244. Zhao Y, Zhao L, Mao T, Zhong L: **Assessment of risk based on variant pathways and establishment of an artificial neural network model of thyroid cancer.** *BMC medical genetics* 2019, **20**(1):92.
245. Allinen M, Beroukhi R, Cai L, Brennan C, Lahti-Domenici J, Huang H, Porter D, Hu M, Chin L, Richardson A: **Molecular characterization of the tumor microenvironment in breast cancer.** *Cancer cell* 2004, **6**(1):17-32.
246. Mancikova V, Buj R, Castelblanco E, Inglada-Pérez L, Diez A, de Cubas AA, Curras-Freixes M, Maravall FX, Mauricio D, Matias-Guiu X: **DNA methylation profiling of well-differentiated thyroid cancer uncovers markers of recurrence free survival.** *International journal of cancer* 2014, **135**(3):598-610.
247. Kachroo P, Lee M-H, Zhang L, Baratelli F, Lee G, Srivastava MK, Wang G, Walser TC, Krysan K, Sharma S: **IL-27 inhibits epithelial-mesenchymal transition and angiogenic factor production in a STAT1-dominant pathway in human non-small cell lung cancer.** *Journal of Experimental & Clinical Cancer Research* 2013, **32**(1):97.
248. Marangoni E, Laurent C, Coussy F, El-Botty R, Château-Joubert S, Servely J-L, de Plater L, Assayag F, Dahmani A, Montaudon E: **Capecitabine efficacy is correlated with TYMP and RB1 expression in PDX established from triple-negative breast cancers.** *Clinical Cancer Research* 2018, **24**(11):2605-2615.
249. Airoidi I, Tupone MG, Esposito S, Russo MV, Barbarito G, Cipollone G, Di Carlo E: **Interleukin-27 re-educates intratumoral myeloid cells and down-regulates stemness genes in non-small cell lung cancer.** *Oncotarget* 2015, **6**(6):3694.
250. Zhou J, Wulfkuhle J, Zhang H, Gu P, Yang Y, Deng J, Margolick JB, Liotta LA, Petricoin E, Zhang Y: **Activation of the PTEN/mTOR/STAT3 pathway in breast cancer stem-like cells is required for viability and maintenance.** *Proceedings of the National Academy of Sciences* 2007, **104**(41):16158-16163.
251. Couto JP, Daly L, Almeida A, Knauf JA, Fagin JA, Sobrinho-Simões M, Lima J, Máximo V, Soares P, Lyden D: **STAT3 negatively regulates thyroid tumorigenesis.** *Proceedings of the National Academy of Sciences* 2012, **109**(35):E2361-E2370.
252. Zheng W, Long J, Gao Y-T, Li C, Zheng Y, Xiang Y-B, Wen W, Levy S, Deming SL, Haines JL: **Genome-wide association study identifies a new breast cancer susceptibility locus at 6q25. 1.** *Nature genetics* 2009, **41**(3):324.
253. Shiozaki A, Lodyga M, Bai X-H, Nadesalingam J, Oyaizu T, Winer D, Asa SL, Keshavjee S, Liu M: **XB130, a novel adaptor protein, promotes thyroid tumor growth.** *The American journal of pathology* 2011, **178**(1):391-401.
254. Zhang X, Yue P, Page BD, Li T, Zhao W, Namanja AT, Paladino D, Zhao J, Chen Y,

- Gunning PT: **Orally bioavailable small-molecule inhibitor of transcription factor Stat3 regresses human breast and lung cancer xenografts.** *Proceedings of the National Academy of Sciences* 2012, **109**(24):9623-9628.
255. Liu CC, Lin JH, Hsu TW, Su K, Li AFY, Hsu HS, Hung SC: **IL-6 enriched lung cancer stem-like cell population by inhibition of cell cycle regulators via DNMT1 upregulation.** *International Journal of Cancer* 2015, **136**(3):547-559.
256. Arakawa Y, Watanabe M, Inoue N, Sarumaru M, Hidaka Y, Iwatani Y: **Association of polymorphisms in DNMT1, DNMT3A, DNMT3B, MTHFR and MTRR genes with global DNA methylation levels and prognosis of autoimmune thyroid disease.** *Clinical & Experimental Immunology* 2012, **170**(2):194-201.
257. Kanda N, Seno H, Konda Y, Marusawa H, Kanai M, Nakajima T, Kawashima T, Nanakin A, Sawabu T, Uenoyama Y: **STAT3 is constitutively activated and supports cell survival in association with survivin expression in gastric cancer cells.** *Oncogene* 2004, **23**(28):4921.
258. Boehm JS, Zhao JJ, Yao J, Kim SY, Firestein R, Dunn IF, Sjöström SK, Garraway LA, Weremowicz S, Richardson AL: **Integrative genomic approaches identify IKBKE as a breast cancer oncogene.** *Cell* 2007, **129**(6):1065-1079.
259. Ali Z, Deng Y, Tang Y, Zheng S, Ma N, He N: **Epigenetic deregulations in gastric cancer.** *Journal of nanoscience and nanotechnology* 2013, **13**(1):40-51.
260. Arce C, Pérez-Plasencia C, González-Fierro A, de la Cruz-Hernández E, Revilla-Vázquez A, Chávez-Blanco A, Trejo-Becerril C, Pérez-Cárdenas E, Taja-Chayeb L, Bargallo E: **A proof-of-principle study of epigenetic therapy added to neoadjuvant doxorubicin cyclophosphamide for locally advanced breast cancer.** *PloS one* 2006, **1**(1):e98.
261. Katoh H, Yamashita K, Enomoto T, Watanabe M: **Classification and general considerations of thyroid cancer.** *Ann Clin Pathol* 2015, **3**(1):1045.
262. Zhang Q, Sturgill JL, Kmieciak M, Szczepanek K, Derecka M, Koebel C, Graham LJ, Dai Y, Chen S, Grant S: **The role of Tyk2 in regulation of breast cancer growth.** *Journal of Interferon & Cytokine Research* 2011, **31**(9):671-677.
263. Jin S, Borkhuu O, Bao W, Yang Y-T: **Signaling pathways in thyroid cancer and their therapeutic implications.** *Journal of clinical medicine research* 2016, **8**(4):284.
264. Rasheed BA, McLendon RE, Herndon JE, Friedman HS, Friedman AH, Bigner DD, Bigner SH: **Alterations of the TP53 gene in human gliomas.** *Cancer research* 1994, **54**(5):1324-1330.
265. Rogounovitch TI, Saenko VA, Ashizawa K, Sedliarou IA, Namba H, Abrosimov AY, Lushnikov EF, Roumiantsev PO, Konova MV, Petoukhova NS: **TP53 codon 72 polymorphism in radiation-associated human papillary thyroid cancer.** *Oncology reports* 2006, **15**(4):949-956.
266. Yang CH, Yue J, Pfeffer SR, Fan M, Paulus E, Hosni-Ahmed A, Sims M, Qayyum S, Davidoff AM, Handorf CR: **MicroRNA-21 promotes glioblastoma tumorigenesis by down-regulating insulin-like growth factor-binding protein-3 (IGFBP3).** *Journal of Biological Chemistry* 2014, **289**(36):25079-25087.
267. Siegel G, Tomer Y: **Is there an association between acromegaly and thyroid carcinoma? A critical review of the literature.** *Endocrine research* 2005, **31**(1):51-58.
268. Gemmill RM, Roche J, Potiron VA, Nasarre P, Mitas M, Coldren CD, Helfrich BA,

- Garrett-Mayer E, Bunn PA, Drabkin HA: **ZEB1-responsive genes in non-small cell lung cancer**. *Cancer letters* 2011, **300**(1):66-78.
269. Yang J, Zhang X, Zhang Y, Zhu D, Zhang L, Li Y, Zhu Y, Li D, Zhou J: **HIF-2 $\alpha$  promotes epithelial-mesenchymal transition through regulating Twist2 binding to the promoter of E-cadherin in pancreatic cancer**. *Journal of Experimental & Clinical Cancer Research* 2016, **35**(1):26.
270. Leidinger P, Keller A, Backes C, Huwer H, Meese E: **MicroRNA expression changes after lung cancer resection: a follow-up study**. *RNA biology* 2012, **9**(6):900-910.
271. Bommer GT, Jäger C, Dürr E-M, Baehs S, Eichhorst ST, Brabletz T, Hu G, Fröhlich T, Arnold G, Kress DC: **DRO1, a gene down-regulated by oncogenes, mediates growth inhibition in colon and pancreatic cancer cells**. *Journal of Biological Chemistry* 2005, **280**(9):7962-7975.
272. Landa I, Ruiz-Llorente S, Montero-Conde C, Inglada-Pérez L, Schiavi F, Leskelä S, Pita G, Milne R, Maravall J, Ramos I: **The variant rs1867277 in FOXE1 gene confers thyroid cancer susceptibility through the recruitment of USF1/USF2 transcription factors**. *PLoS genetics* 2009, **5**(9):e1000637.
273. Wallrarr C, MÜLLER-PILLASCH F, Micha A, Wenger C, Geng M, Solinas-Toldo S, Lichter P, Frohme M, Hoheisel J, Adler G: **Strategies for the detection of disease genes in pancreatic cancer**. *Annals of the New York Academy of Sciences* 1999, **880**(1):122-146.
274. Jeong S, Lee J, Kim D, Seol M-Y, Lee WK, Jeong JJ, Nam K-H, Jung SG, Shin DY, Lee EJ: **Relationship of focally amplified long noncoding on chromosome 1 (FAL1) lncRNA with E2F transcription factors in thyroid cancer**. *Medicine* 2016, **95**(4).

**Table S4.** miRNAs targeted by H19

| <b>miRNA</b> | <b>Description</b>                                                                                                                            | <b>Reference</b> |
|--------------|-----------------------------------------------------------------------------------------------------------------------------------------------|------------------|
| let-7a       | ➤ The H19/let-7 double-negative feedback loop contributes to glucose metabolism in muscle cells.                                              | [1]<br>[2]       |
|              | ➤ The imprinted H19 lncRNA antagonizes let-7 microRNAs.                                                                                       | [3]              |
|              | ➤ H19 lncRNA alters stromal cell growth via IGF signaling in the endometrium of women with endometriosis.                                     | [4]              |
|              | ➤ Glycolysis gatekeeper PDK1 reprograms breast cancer stem cells under hypoxia.                                                               |                  |
| let-7b       | ➤ The imprinted H19 lncRNA antagonizes let-7 microRNAs.                                                                                       | [2]              |
|              | ➤ Glycolysis gatekeeper PDK1 reprograms breast cancer stem cells under hypoxia.                                                               | [4]<br>[5]       |
|              | ➤ The lncRNA H19 mediates breast cancer cell plasticity during EMT and MET plasticity by differentially sponging miR-200b/c and let-7b.       |                  |
| let-7g       | ➤ The imprinted H19 lncRNA antagonizes let-7 microRNAs.                                                                                       | [2]              |
|              | ➤ H19 lncRNA alters stromal cell growth via IGF signaling in the endometrium of women with endometriosis.                                     | [3]              |
| let-7i       | ➤ H19/let-7/LIN28 reciprocal negative regulatory circuit promotes breast cancer stem cell maintenance.                                        | [6]              |
| miR-106a     | ➤ miR-CLIP capture of a miRNA targetome uncovers a lincRNA H19-miR-106a interaction.                                                          | [7]              |
| miR-130b-3p  | ➤ H19 lncRNA regulates keratinocyte differentiation by targeting miR-130b-3p.                                                                 | [8]              |
| miR-138-5p   | ➤ Decreased Expression of MiR-138-5p by LncRNA H19 in Cervical Cancer Promotes Tumor Proliferation.                                           | [9]              |
| miR-139      | ➤ H19 lncRNA alters stromal cell growth via IGF signaling in the endometrium of women with endometriosis.                                     | [3]<br>[10]      |
|              | ➤ Long Non-Coding RNA H19 Protects H9c2 Cells against Hypoxia-Induced Injury by Targeting MicroRNA-139.                                       |                  |
| miR-141      | ➤ H19 activates Wnt signaling and promotes osteoblast differentiation by functioning as a competing endogenous RNA.                           | [11]             |
| miR-152-3p   | ➤ Long non-coding RNA H19 promotes the proliferation and invasion of breast cancer through upregulating DNMT1 expression by sponging miR-152. | [12]             |
| miR-152-5p   | ➤ Long non-coding RNA H19 promotes the proliferation and invasion of breast cancer through upregulating DNMT1 expression by sponging miR-152. | [12]             |
| miR-17-5p    | ➤ Long noncoding RNA H19 competitively binds miR-17-5p to regulate YES1 expression in thyroid cancer.                                         | [13]<br>[14]     |
|              | ➤ Long non-coding RNA H19 suppresses retinoblastoma progression                                                                               |                  |



---

|             |   |                                                                                                                                                                |      |
|-------------|---|----------------------------------------------------------------------------------------------------------------------------------------------------------------|------|
|             |   | via counteracting miR-17-92 cluster.                                                                                                                           |      |
| miR-181d-3p | ➤ | Hypoxia induces H19 expression through direct and indirect Hif-1 $\alpha$ activity, promoting oncogenic effects in glioblastoma.                               | [15] |
| miR-181d-5p | ➤ | Hypoxia induces H19 expression through direct and indirect Hif-1 $\alpha$ activity, promoting oncogenic effects in glioblastoma.                               | [15] |
| miR-18a     | ➤ | Long non-coding RNA H19 suppresses retinoblastoma progression via counteracting miR-17-92 cluster.                                                             | [14] |
| miR-194-5p  | ➤ | Long noncoding RNA H19 contributes to gallbladder cancer cell proliferation by modulated miR-194-5p targeting AKT2.                                            | [16] |
| miR-196a    | ➤ | The lncRNA H19 Mediates Pulmonary Fibrosis by Regulating the miR-196a/COL1A1 Axis.                                                                             | [17] |
| miR-19a     | ➤ | Long non-coding RNA H19 suppresses retinoblastoma progression via counteracting miR-17-92 cluster.                                                             | [14] |
| miR-19b-1   | ➤ | Long non-coding RNA H19 suppresses retinoblastoma progression via counteracting miR-17-92 cluster.                                                             | [14] |
| miR-200b    | ➤ | The lncRNA H19 mediates breast cancer cell plasticity during EMT and MET plasticity by differentially sponging miR-200b/c and let-7b.                          | [5]  |
| miR-200c    | ➤ | The lncRNA H19 mediates breast cancer cell plasticity during EMT and MET plasticity by differentially sponging miR-200b/c and let-7b.                          | [5]  |
| miR-20a     | ➤ | Long non-coding RNA H19 suppresses retinoblastoma progression via counteracting miR-17-92 cluster.                                                             | [14] |
| miR-22      | ➤ | H19 activates Wnt signaling and promotes osteoblast differentiation by functioning as a competing endogenous RNA.                                              | [11] |
| miR-29a     | ➤ | Long non-coding RNA H19 regulates glioma angiogenesis and the biological behavior of glioma-associated endothelial cells by inhibiting microRNA-29a.           | [18] |
| miR-29b     | ➤ | Long noncoding RNA H19 accelerates tenogenic differentiation and promotes tendon healing through targeting miR-29b-3p and activating TGF- $\beta$ 1 signaling. | [19] |
| miR-342-3p  | ➤ | Long non-coding RNA H19 regulates FOXM1 expression by competitively binding endogenous miR-342-3p in gallbladder cancer.                                       | [20] |
| miR-630     | ➤ | Long noncoding RNA H19 regulates EZH2 expression by interacting with miR-630 and promotes cell invasion in nasopharyngeal carcinoma.                           | [21] |
| miR-874     | ➤ | LncRNA H19 functions as a competing endogenous RNA to regulate AQP3 expression by sponging miR-874 in the intestinal barrier.                                  | [22] |
| miR-92a-1   | ➤ | Long non-coding RNA H19 suppresses retinoblastoma progression via counteracting miR-17-92 cluster.                                                             | [14] |

---

## Reference

1. Gao Y, Wu F, Zhou J, Yan L, Jurczak MJ, Lee H-Y, Yang L, Mueller M, Zhou X-B, Dandolo L:

- The H19/let-7 double-negative feedback loop contributes to glucose metabolism in muscle cells.** *Nucleic acids research* 2014, **42**(22):13799-13811.
2. Kallen AN, Zhou X-B, Xu J, Qiao C, Ma J, Yan L, Lu L, Liu C, Yi J-S, Zhang H: **The imprinted H19 lncRNA antagonizes let-7 microRNAs.** *Molecular cell* 2013, **52**(1):101-112.
  3. Ghazal S, McKinnon B, Zhou J, Mueller M, Men Y, Yang L, Mueller M, Flannery C, Huang Y, Taylor HS: **H19 lncRNA alters stromal cell growth via IGF signaling in the endometrium of women with endometriosis.** *EMBO molecular medicine* 2015, **7**(8):996-1003.
  4. Peng F, Wang J-H, Fan W-J, Meng Y-T, Li M-M, Li T-T, Cui B, Wang H-F, Zhao Y, An F: **Glycolysis gatekeeper PDK1 reprograms breast cancer stem cells under hypoxia.** *Oncogene* 2018, **37**(8):1062.
  5. Zhou W, Ye X-l, Xu J, Cao M-G, Fang Z-Y, Li L-Y, Guan G-H, Liu Q, Qian Y-H, Xie D: **The lncRNA H19 mediates breast cancer cell plasticity during EMT and MET plasticity by differentially sponging miR-200b/c and let-7b.** *Sci Signal* 2017, **10**(483):eaak9557.
  6. Peng F, Li T-T, Wang K-L, Xiao G-Q, Wang J-H, Zhao H-D, Kang Z-J, Fan W-J, Zhu L-L, Li M: **H19/let-7/LIN28 reciprocal negative regulatory circuit promotes breast cancer stem cell maintenance.** *Cell death & disease* 2017, **8**(1):e2569.
  7. Imig J, Brunschweiler A, Brümmer A, Guennewig B, Mittal N, Kishore S, Tsirikla P, Gerber AP, Zavolan M, Hall J: **miR-CLIP capture of a miRNA targetome uncovers a lincRNA H19-miR-106a interaction.** *Nature chemical biology* 2015, **11**(2):107.
  8. Li C-x, Li H-g, Huang L-t, Kong Y-w, Chen F-y, Liang J-y, Yu H, Yao Z-r: **H19 lncRNA regulates keratinocyte differentiation by targeting miR-130b-3p.** *Cell death & disease* 2017, **8**(11):e3174.
  9. Ou L, Wang D, Zhang H, Yu Q, Hua F: **Decreased expression of MiR-138-5p by LncRNA H19 in cervical cancer promotes tumor proliferation.** *Oncology Research Featuring Preclinical and Clinical Cancer Therapeutics* 2018, **26**(3):401-410.
  10. Gong L-C, Xu H-M, Guo G-L, Zhang T, Shi J-W, Chang C: **Long non-coding rna h19 protects h9c2 cells against hypoxia-induced injury by targeting microrna-139.** *Cellular Physiology and Biochemistry* 2017, **44**(3):857-869.
  11. Liang W-C, Fu W-M, Wang Y-B, Sun Y-X, Xu L-L, Wong C-W, Chan K-M, Li G, Waye MM-Y, Zhang J-F: **H19 activates Wnt signaling and promotes osteoblast differentiation by functioning as a competing endogenous RNA.** *Scientific reports* 2016, **6**:20121.
  12. Li Z, Li Y, Li Y, Ren K, Li X, Han X, Wang J: **Long non-coding RNA H19 promotes the proliferation and invasion of breast cancer through upregulating DNMT1 expression by sponging miR-152.** *Journal of biochemical and molecular toxicology* 2017, **31**(9):e21933.
  13. Liu L, Yang J, Zhu X, Li D, Lv Z, Zhang X: **Long noncoding RNA H19 competitively binds miR-17-5p to regulate YES1 expression in thyroid cancer.** *The FEBS journal* 2016, **283**(12):2326-2339.
  14. Zhang A, Shang W, Nie Q, Li T, Li S: **Long non-coding RNA H19 suppresses retinoblastoma progression via counteracting miR-17-92 cluster.** *Journal of cellular biochemistry* 2018, **119**(4):3497-3509.
  15. Wu W, Hu Q, Nie E, Yu T, Wu Y, Zhi T, Jiang K, Shen F, Wang Y, Zhang J: **Hypoxia induces H19 expression through direct and indirect Hif-1 $\alpha$  activity, promoting oncogenic effects in glioblastoma.** *Scientific reports* 2017, **7**:45029.
  16. Wang S-H, Wu X-C, Zhang M-D, Weng M-Z, Zhou D, Quan Z-W: **Long noncoding RNA H19**

- contributes to gallbladder cancer cell proliferation by modulated miR-194-5p targeting AKT2.** *Tumor Biology* 2016, **37**(7):9721-9730.
17. Lu Q, Guo Z, Xie W, Jin W, Zhu D, Chen S, Ren T: **The lncRNA H19 Mediates Pulmonary Fibrosis by Regulating the miR-196a/COL1A1 Axis.** *Inflammation* 2018, **41**(3):896-903.
18. Jia P, Cai H, Liu X, Chen J, Ma J, Wang P, Liu Y, Zheng J, Xue Y: **Long non-coding RNA H19 regulates glioma angiogenesis and the biological behavior of glioma-associated endothelial cells by inhibiting microRNA-29a.** *Cancer letters* 2016, **381**(2):359-369.
19. Lu Y-F, Liu Y, Fu W-M, Xu J, Wang B, Sun Y-X, Wu T-Y, Xu L-L, Chan K-M, Zhang J-F: **Long noncoding RNA H19 accelerates tenogenic differentiation and promotes tendon healing through targeting miR-29b-3p and activating TGF- $\beta$ 1 signaling.** *The FASEB Journal* 2016, **31**(3):954-964.
20. Wang S-H, Ma F, Tang Z-h, Wu X-C, Cai Q, Zhang M-D, Weng M-Z, Zhou D, Wang J-D, Quan Z-W: **Long non-coding RNA H19 regulates FOXM1 expression by competitively binding endogenous miR-342-3p in gallbladder cancer.** *Journal of Experimental & Clinical Cancer Research* 2016, **35**(1):160.
21. Li X, Lin Y, Yang X, Wu X, He X: **Long noncoding RNA H19 regulates EZH2 expression by interacting with miR-630 and promotes cell invasion in nasopharyngeal carcinoma.** *Biochemical and biophysical research communications* 2016, **473**(4):913-919.
22. Su Z, Zhi X, Zhang Q, Yang L, Xu H, Xu Z: **Lnc RNA H19 functions as a competing endogenous RNA to regulate AQP 3 expression by sponging miR-874 in the intestinal barrier.** *FEBS letters* 2016, **590**(9):1354-1364.

**Table S5.** Regulation of 29 miRNAs in eight triplets.

**H19-ETS1-TGFBR2**

| miRNAs                             | miR-106a | miR-130b-3p | miR-138-5p | miR-139 | miR-141 | miR-152-3p | miR-152-5p |
|------------------------------------|----------|-------------|------------|---------|---------|------------|------------|
| <b>Predicted targets of miRNAs</b> |          |             |            |         |         |            |            |
| <b>TFs</b>                         | RUNX1    | FOSL2       | EZH2       | ETS1    | CREBBP  | KLF6       | KLF6       |
|                                    | E2F1     | MYB         | POU2F1     |         | POU2F1  | KLF4       | E2F3       |
|                                    | PPARA    | STAT3       | RELA       |         |         |            | KLF4       |
|                                    | RB1      |             | SP1        |         |         |            |            |
|                                    | SP1      |             |            |         |         |            |            |
|                                    | STAT3    |             |            |         |         |            |            |
|                                    | KAT2B    |             |            |         |         |            |            |
|                                    |          |             |            |         |         |            |            |
| <b>Genes</b>                       | CALD1    | FMR1        | HIF1A      | FMR1    | FMR1    | CHUK       | DNMT1      |
|                                    | CCNG2    | MET         | KLF11      | MAPK8   |         | DNMT1      | FBN1       |
|                                    | E2F1     | TGFBR2      |            | ZEB1    |         | FBN1       | FMR1       |
|                                    | HIF1A    |             |            |         |         | FMR1       | SOS1       |
|                                    | SMAD4    |             |            |         |         | SOS1       |            |
|                                    | MMP2     |             |            |         |         |            |            |
|                                    | MAPK8    |             |            |         |         |            |            |
|                                    | SOS1     |             |            |         |         |            |            |
|                                    | TGFBR2   |             |            |         |         |            |            |
|                                    | KLF11    |             |            |         |         |            |            |
|                                    | TXNIP    |             |            |         |         |            |            |

**Validated targets of miRNAs**

|              |        |        |        |       |       |        |  |
|--------------|--------|--------|--------|-------|-------|--------|--|
| <b>TFs</b>   | E2F1   | AHR    | EZH2   | NFKB1 | E2F3  | KLF4   |  |
|              | MYB    | E2F1   | NFKB1  |       | PPARA |        |  |
|              | RB1    | NR3C1  | SNAI2  |       | HDGF  |        |  |
|              | RUNX1  | PPARA  | SOX9   |       |       |        |  |
|              | STAT3  | RB1    | TWIST2 |       |       |        |  |
|              |        | STAT3  |        |       |       |        |  |
|              |        |        |        |       |       |        |  |
|              |        |        |        |       |       |        |  |
|              |        |        |        |       |       |        |  |
|              |        |        |        |       |       |        |  |
| <b>Genes</b> | E2F1   | E2F1   | HIF1A  | HRAS  | ZEB1  | DNMT1  |  |
|              | FAS    | KLF11  | SNAI2  | MET   | EIF4E | ADAM17 |  |
|              | TGFBR2 | SMAD4  |        |       | KLF11 |        |  |
|              | ATM    | TGFBR2 |        |       | ZEB1  |        |  |
|              | HIF1A  | ZEB1   |        |       |       |        |  |
|              |        | FMR1   |        |       |       |        |  |
|              |        | MMP2   |        |       |       |        |  |
|              |        |        |        |       |       |        |  |
|              |        |        |        |       |       |        |  |
|              |        |        |        |       |       |        |  |

Notes: In the H19-ETS1-TGFBR2 sheet, we list all the 29 miRNAs and their targets (TFs and genes). Some of the targets were predicted and then verified. In the H19-ETS1-TGFBR2 table, TFs are marked in yellow if miRNAs target them, and genes are marked in red if miRNAs target them.

|        |        |             |             |         |            |          |         |
|--------|--------|-------------|-------------|---------|------------|----------|---------|
| miRNAs | miR-17 | miR-181d-3p | miR-181d-5p | miR-18a | miR-194-5p | miR-196a | miR-19a |
|--------|--------|-------------|-------------|---------|------------|----------|---------|

**Predicted targets  
of miRNAs**

|              |        |  |         |        |      |        |      |
|--------------|--------|--|---------|--------|------|--------|------|
| <b>TFs</b>   | RUNX1  |  | RUNX1   | RUNX1  | E2F3 | ERG    |      |
|              | E2F1   |  | KLF6    | KLF6   | FLI1 | FLI1   |      |
|              | RB1    |  | ETS1    | NR3C1  | SP3  |        |      |
|              | STAT3  |  | NR3C1   | POU2F1 |      |        |      |
|              | KAT2B  |  | KAT2B   |        |      |        |      |
|              |        |  |         |        |      |        |      |
|              |        |  |         |        |      |        |      |
|              |        |  |         |        |      |        |      |
| <b>Genes</b> | CALD1  |  | ATM     | ATM    | ACP5 | FAS    | FMR1 |
|              | CCNG2  |  | SOS1    | CTGF   | FMR1 | COL1A1 | IL18 |
|              | E2F1   |  | VCAM1   | HIF1A  | SP3  | MAPK8  |      |
|              | HIF1A  |  | EPB41L3 | HMGCS1 | RSF1 | ZEB1   |      |
|              | MMP2   |  |         | MAPK8  |      |        |      |
|              | SOS1   |  |         |        |      |        |      |
|              | TGFBR2 |  |         |        |      |        |      |
|              | KLF11  |  |         |        |      |        |      |
|              | TXNIP  |  |         |        |      |        |      |
|              |        |  |         |        |      |        |      |
|              |        |  |         |        |      |        |      |

**Validated targets  
of miRNAs**

|              |        |  |      |        |       |        |        |
|--------------|--------|--|------|--------|-------|--------|--------|
| <b>TFs</b>   | E2F1   |  |      | NR3C1  | FOXM1 | FOXO1  | KAT2B  |
|              | E2F3   |  |      | RUNX1  |       |        |        |
|              | KAT2B  |  |      |        |       |        |        |
|              | MYC    |  |      |        |       |        |        |
|              | RB1    |  |      |        |       |        |        |
|              | RUNX1  |  |      |        |       |        |        |
|              | STAT3  |  |      |        |       |        |        |
|              |        |  |      |        |       |        |        |
|              |        |  |      |        |       |        |        |
|              |        |  |      |        |       |        |        |
| <b>Genes</b> | E2F1   |  | HRAS | CTGF   |       | FLNA   | CTGF   |
|              | MMP2   |  |      | EDF1   |       | TGFBR2 | SMAD4  |
|              | MYC    |  |      | ATM    |       |        | TGFBR2 |
|              | SMAD4  |  |      | HIF1A  |       |        | DNMT1  |
|              | TGFBR2 |  |      | HMGCS1 |       |        |        |
|              | HIF1A  |  |      | SMAD4  |       |        |        |
|              | DNMT1  |  |      | TGFBR2 |       |        |        |
|              | IGFBP3 |  |      | DNMT1  |       |        |        |
|              |        |  |      |        |       |        |        |
|              |        |  |      |        |       |        |        |

|        |           |          |          |         |        |         |         |
|--------|-----------|----------|----------|---------|--------|---------|---------|
| miRNAs | miR-19b-1 | miR-200b | miR-200c | miR-20a | miR-22 | miR-29a | miR-29b |
|--------|-----------|----------|----------|---------|--------|---------|---------|

**Predicted targets  
of miRNAs**

|              |  |       |  |        |        |       |       |
|--------------|--|-------|--|--------|--------|-------|-------|
| <b>TFs</b>   |  | KLF6  |  | E2F1   | FOXO1  | ETS1  | MYBL2 |
|              |  | SP3   |  | E2F3   | HNRNPK | KAT2B |       |
|              |  |       |  | EZH2   |        |       |       |
|              |  |       |  | PPARA  |        |       |       |
|              |  |       |  | RB1    |        |       |       |
|              |  |       |  | STAT3  |        |       |       |
|              |  |       |  | KAT2B  |        |       |       |
|              |  |       |  |        |        |       |       |
| <b>Genes</b> |  | NCF2  |  | CALD1  | CD68   |       | DNMT1 |
|              |  | MAPK8 |  | CCNG2  | SOS1   |       | FBN1  |
|              |  | SP3   |  | E2F1   | UTRN   |       | EDF1  |
|              |  |       |  | HIF1A  | VCAM1  |       |       |
|              |  |       |  | SMAD4  | WRN    |       |       |
|              |  |       |  | MMP2   |        |       |       |
|              |  |       |  | MAPK8  |        |       |       |
|              |  |       |  | SOS1   |        |       |       |
|              |  |       |  | TGFBR2 |        |       |       |
|              |  |       |  | KLF11  |        |       |       |
|              |  |       |  | TXNIP  |        |       |       |

**Validated targets  
of miRNAs**

|              |        |       |        |        |       |       |        |
|--------------|--------|-------|--------|--------|-------|-------|--------|
| <b>TFs</b>   | KAT2B  | E2F3  | MYB    | E2F1   | PPARA | KLF4  | SP1    |
|              | NR3C1  | ETS1  | ETS1   | E2F3   |       | AHR   | STAT3  |
|              |        | MYB   | SP1    | MYC    |       | MYC   | SP1    |
|              |        | SP1   | E2F3   | RB1    |       |       | STAT3  |
|              |        | EZH2  | FOXO1  | RUNX1  |       |       | MYC    |
|              |        |       | E2F3   | STAT3  |       |       |        |
|              |        |       |        |        |       |       |        |
|              |        |       |        |        |       |       |        |
|              |        |       |        |        |       |       |        |
|              |        |       |        |        |       |       |        |
| <b>Genes</b> | CTGF   | CREB1 | FLNA   | CCNB1  | HIF1A | MMP2  | COL1A1 |
|              | FMR1   | FN1   | FN1    | E2F1   |       | DNMT1 | DNMT1  |
|              | ATM    | KLF11 | KLF11  | FLNA   |       | FBN1  | MMP2   |
|              | HMGCS1 | ZEB1  | ZEB1   | HIF1A  |       | MYC   | FBN1   |
|              | SMAD4  | DNMT1 | NCAM1  | MYC    |       |       | MYC    |
|              | TGFBR2 |       | CYP1B1 | SMAD4  |       |       |        |
|              | DNMT1  |       |        | TGFBR2 |       |       |        |
|              |        |       |        | DNMT1  |       |       |        |
|              |        |       |        |        |       |       |        |
|              |        |       |        |        |       |       |        |

|        |            |         |         |           |        |        |        |
|--------|------------|---------|---------|-----------|--------|--------|--------|
| miRNAs | miR-342-3p | miR-630 | miR-874 | miR-92a-1 | let-7a | let-7b | let-7g |
|--------|------------|---------|---------|-----------|--------|--------|--------|

**Predicted targets  
of miRNAs**

|              |       |      |        |        |        |        |        |
|--------------|-------|------|--------|--------|--------|--------|--------|
| <b>TFs</b>   | E2F3  | KLF6 | POU2F1 |        | EZH2   | EZH2   | EZH2   |
|              |       | EZH2 | STAT3  |        | POU2F1 | POU2F1 | POU2F1 |
|              |       |      |        |        | RB1    | RB1    | RB1    |
|              |       |      |        |        | TP53   | TP53   | TP53   |
|              |       |      |        |        |        |        |        |
|              |       |      |        |        |        |        |        |
|              |       |      |        |        |        |        |        |
|              |       |      |        |        |        |        |        |
| <b>Genes</b> | DNMT1 |      | FBN1   | COL1A1 | FAS    | FAS    | FAS    |
|              | ZEB1  |      | FMR1   | DACT3  | COL1A1 | COL1A1 | COL1A1 |
|              |       |      | SIGIRR |        | IL6    | IL6    | IL6    |
|              |       |      |        |        | MAPK8  | MAPK8  | MAPK8  |
|              |       |      |        |        | UTRN   | UTRN   | UTRN   |
|              |       |      |        |        |        |        |        |
|              |       |      |        |        |        |        |        |
|              |       |      |        |        |        |        |        |
|              |       |      |        |        |        |        |        |
|              |       |      |        |        |        |        |        |
|              |       |      |        |        |        |        |        |

**Validated targets  
of miRNAs**

|              |       |       |       |         |       |         |     |
|--------------|-------|-------|-------|---------|-------|---------|-----|
| <b>TFs</b>   | FOSL2 | SNAI2 | PARP1 | HDAC1   | E2F1  | CTCF    | MYC |
|              | E2F1  | FOXM1 | HDAC1 | HDGF    | EZH2  | E2F3    |     |
|              |       |       | STAT3 | KAT2B   | MYC   | EZH2    |     |
|              |       |       | E2F3  | MYBL2   | NFKB1 | MYC     |     |
|              |       |       |       | NFKB1   | PARP1 | SOX9    |     |
|              |       |       |       | STAT3   | SP1   | SP1     |     |
|              |       |       |       | HDAC2   | STAT3 |         |     |
|              |       |       |       | KLF4    |       |         |     |
|              |       |       |       | IKZF1   |       |         |     |
|              |       |       |       |         |       |         |     |
|              |       |       |       |         |       |         |     |
| <b>Genes</b> | DNMT1 | SNAI2 |       | ATM     | MYC   | BIRC5   | MYC |
|              | E2F1  |       |       | CCNB1   | HRAS  | CCNB1   | FN1 |
|              |       |       |       | EPB41L3 | E2F1  | EPB41L3 |     |
|              |       |       |       | FLNA    | IL6   | FLNA    |     |
|              |       |       |       | HMGCS1  |       | HIF1A   |     |
|              |       |       |       | SMAD4   |       | HMGCS1  |     |
|              |       |       |       | TGFBR2  |       | MYC     |     |
|              |       |       |       | TYMP    |       | UTRN    |     |
|              |       |       |       | MAPK8   |       | HRAS    |     |
|              |       |       |       | DNMT1   |       |         |     |











|        |           |        |        |        |        |
|--------|-----------|--------|--------|--------|--------|
| miRNAs | miR-92a-1 | let-7a | let-7b | let-7g | let-7i |
|--------|-----------|--------|--------|--------|--------|

**Predicted targets  
of miRNAs**

|              |        |        |        |        |        |
|--------------|--------|--------|--------|--------|--------|
| <b>TFs</b>   |        | EZH2   | EZH2   | EZH2   | EZH2   |
|              |        | POU2F1 | POU2F1 | POU2F1 | POU2F1 |
|              |        | RB1    | RB1    | RB1    | RB1    |
|              |        | TP53   | TP53   | TP53   | TP53   |
|              |        |        |        |        |        |
|              |        |        |        |        |        |
|              |        |        |        |        |        |
|              |        |        |        |        |        |
| <b>Genes</b> | COL1A1 | FAS    | FAS    | FAS    | FAS    |
|              | DACT3  | COL1A1 | COL1A1 | COL1A1 | CHUK   |
|              |        | IL6    | IL6    | IL6    | COL1A1 |
|              |        | MAPK8  | MAPK8  | MAPK8  | IL6    |
|              |        | UTRN   | UTRN   | UTRN   | MAPK8  |
|              |        |        |        |        | UTRN   |
|              |        |        |        |        |        |
|              |        |        |        |        |        |
|              |        |        |        |        |        |
|              |        |        |        |        |        |
|              |        |        |        |        |        |
|              |        |        |        |        |        |

**Validated targets  
of miRNAs**

|              |         |       |         |     |  |
|--------------|---------|-------|---------|-----|--|
| <b>TFs</b>   | HDAC1   | E2F1  | CTCF    | MYC |  |
|              | HDGF    | EZH2  | E2F3    |     |  |
|              | KAT2B   | MYC   | EZH2    |     |  |
|              | MYBL2   | NFKB1 | MYC     |     |  |
|              | NFKB1   | PARP1 | SOX9    |     |  |
|              | STAT3   | SP1   | SP1     |     |  |
|              | HDAC2   | STAT3 |         |     |  |
|              | KLF4    |       |         |     |  |
|              | IKZF1   |       |         |     |  |
|              |         |       |         |     |  |
|              |         |       |         |     |  |
| <b>Genes</b> | ATM     | MYC   | BIRC5   | MYC |  |
|              | CCNB1   | HRAS  | CCNB1   | FN1 |  |
|              | EPB41L3 | E2F1  | EPB41L3 |     |  |
|              | FLNA    | IL6   | FLNA    |     |  |
|              | HMGCS1  |       | HIF1A   |     |  |
|              | SMAD4   |       | HMGCS1  |     |  |
|              | TGFBR2  |       | MYC     |     |  |
|              | TYMP    |       | UTRN    |     |  |
|              | MAPK8   |       | HRAS    |     |  |
|              | DNMT1   |       |         |     |  |

### H19-FOXO1-TXNIP

|        |          |             |            |         |         |            |            |
|--------|----------|-------------|------------|---------|---------|------------|------------|
| miRNAs | miR-106a | miR-130b-3p | miR-138-5p | miR-139 | miR-141 | miR-152-3p | miR-152-5p |
|--------|----------|-------------|------------|---------|---------|------------|------------|

#### Predicted targets of miRNAs

|              |        |        |        |       |        |       |       |
|--------------|--------|--------|--------|-------|--------|-------|-------|
| <b>TFs</b>   | RUNX1  | FOSL2  | EZH2   | ETS1  | CREBBP | KLF6  | KLF6  |
|              | E2F1   | MYB    | POU2F1 |       | POU2F1 | KLF4  | E2F3  |
|              | PPARA  | STAT3  | RELA   |       |        |       | KLF4  |
|              | RB1    |        | SP1    |       |        |       |       |
|              | SP1    |        |        |       |        |       |       |
|              | STAT3  |        |        |       |        |       |       |
|              | KAT2B  |        |        |       |        |       |       |
|              |        |        |        |       |        |       |       |
|              |        |        |        |       |        |       |       |
| <b>Genes</b> | CALD1  | FMR1   | HIF1A  | FMR1  | FMR1   | CHUK  | DNMT1 |
|              | CCNG2  | MET    | KLF11  | MAPK8 |        | DNMT1 | FBN1  |
|              | E2F1   | TGFBR2 |        | ZEB1  |        | FBN1  | FMR1  |
|              | HIF1A  |        |        |       |        | FMR1  | SOS1  |
|              | SMAD4  |        |        |       |        | SOS1  |       |
|              | MMP2   |        |        |       |        |       |       |
|              | MAPK8  |        |        |       |        |       |       |
|              | SOS1   |        |        |       |        |       |       |
|              | TGFBR2 |        |        |       |        |       |       |
|              | KLF11  |        |        |       |        |       |       |
|              | TXNIP  |        |        |       |        |       |       |

#### Validated targets of miRNAs

|              |        |        |        |       |       |        |  |
|--------------|--------|--------|--------|-------|-------|--------|--|
| <b>TFs</b>   | E2F1   | AHR    | EZH2   | NFKB1 | E2F3  | KLF4   |  |
|              | MYB    | E2F1   | NFKB1  |       | PPARA |        |  |
|              | RB1    | NR3C1  | SNAI2  |       | HDGF  |        |  |
|              | RUNX1  | PPARA  | SOX9   |       |       |        |  |
|              | STAT3  | RB1    | TWIST2 |       |       |        |  |
|              |        | STAT3  |        |       |       |        |  |
|              |        |        |        |       |       |        |  |
|              |        |        |        |       |       |        |  |
|              |        |        |        |       |       |        |  |
|              |        |        |        |       |       |        |  |
| <b>Genes</b> | E2F1   | E2F1   | HIF1A  | HRAS  | ZEB1  | DNMT1  |  |
|              | FAS    | KLF11  | SNAI2  | MET   | EIF4E | ADAM17 |  |
|              | TGFBR2 | SMAD4  |        |       | KLF11 |        |  |
|              | ATM    | TGFBR2 |        |       | ZEB1  |        |  |
|              | HIF1A  | ZEB1   |        |       |       |        |  |
|              |        | FMR1   |        |       |       |        |  |
|              |        | MMP2   |        |       |       |        |  |
|              |        |        |        |       |       |        |  |
|              |        |        |        |       |       |        |  |
|              |        |        |        |       |       |        |  |

|        |        |             |             |         |            |          |         |
|--------|--------|-------------|-------------|---------|------------|----------|---------|
| miRNAs | miR-17 | miR-181d-3p | miR-181d-5p | miR-18a | miR-194-5p | miR-196a | miR-19a |
|--------|--------|-------------|-------------|---------|------------|----------|---------|

**Predicted targets  
of miRNAs**

|              |        |  |         |        |      |        |      |
|--------------|--------|--|---------|--------|------|--------|------|
| <b>TFs</b>   | RUNX1  |  | RUNX1   | RUNX1  | E2F3 | ERG    |      |
|              | E2F1   |  | KLF6    | KLF6   | FLI1 | FLI1   |      |
|              | RB1    |  | ETS1    | NR3C1  | SP3  |        |      |
|              | STAT3  |  | NR3C1   | POU2F1 |      |        |      |
|              | KAT2B  |  | KAT2B   |        |      |        |      |
|              |        |  |         |        |      |        |      |
|              |        |  |         |        |      |        |      |
|              |        |  |         |        |      |        |      |
| <b>Genes</b> | CALD1  |  | ATM     | ATM    | ACP5 | FAS    | FMR1 |
|              | CCNG2  |  | SOS1    | CTGF   | FMR1 | COL1A1 | IL18 |
|              | E2F1   |  | VCAM1   | HIF1A  | SP3  | MAPK8  |      |
|              | HIF1A  |  | EPB41L3 | HMGCS1 | RSF1 | ZEB1   |      |
|              | MMP2   |  |         | MAPK8  |      |        |      |
|              | SOS1   |  |         |        |      |        |      |
|              | TGFBR2 |  |         |        |      |        |      |
|              | KLF11  |  |         |        |      |        |      |
|              | TXNIP  |  |         |        |      |        |      |
|              |        |  |         |        |      |        |      |
|              |        |  |         |        |      |        |      |

**Validated targets  
of miRNAs**

|              |        |  |      |        |       |        |        |
|--------------|--------|--|------|--------|-------|--------|--------|
| <b>TFs</b>   | E2F1   |  |      | NR3C1  | FOXM1 | FOXO1  | KAT2B  |
|              | E2F3   |  |      | RUNX1  |       |        |        |
|              | KAT2B  |  |      |        |       |        |        |
|              | MYC    |  |      |        |       |        |        |
|              | RB1    |  |      |        |       |        |        |
|              | RUNX1  |  |      |        |       |        |        |
|              | STAT3  |  |      |        |       |        |        |
|              |        |  |      |        |       |        |        |
|              |        |  |      |        |       |        |        |
|              |        |  |      |        |       |        |        |
| <b>Genes</b> | E2F1   |  | HRAS | CTGF   |       | FLNA   | CTGF   |
|              | MMP2   |  |      | EDF1   |       | TGFBR2 | SMAD4  |
|              | MYC    |  |      | ATM    |       |        | TGFBR2 |
|              | SMAD4  |  |      | HIF1A  |       |        | DNMT1  |
|              | TGFBR2 |  |      | HMGCS1 |       |        |        |
|              | HIF1A  |  |      | SMAD4  |       |        |        |
|              | DNMT1  |  |      | TGFBR2 |       |        |        |
|              | IGFBP3 |  |      | DNMT1  |       |        |        |
|              |        |  |      |        |       |        |        |
|              |        |  |      |        |       |        |        |

|        |           |          |          |         |        |         |         |
|--------|-----------|----------|----------|---------|--------|---------|---------|
| miRNAs | miR-19b-1 | miR-200b | miR-200c | miR-20a | miR-22 | miR-29a | miR-29b |
|--------|-----------|----------|----------|---------|--------|---------|---------|

**Predicted targets  
of miRNAs**

|              |  |       |  |        |        |       |       |
|--------------|--|-------|--|--------|--------|-------|-------|
| <b>TFs</b>   |  | KLF6  |  | E2F1   | FOXO1  | ETS1  | MYBL2 |
|              |  | SP3   |  | E2F3   | HNRNPK | KAT2B |       |
|              |  |       |  | EZH2   |        |       |       |
|              |  |       |  | PPARA  |        |       |       |
|              |  |       |  | RB1    |        |       |       |
|              |  |       |  | STAT3  |        |       |       |
|              |  |       |  | KAT2B  |        |       |       |
|              |  |       |  |        |        |       |       |
| <b>Genes</b> |  | NCF2  |  | CALD1  | CD68   |       | DNMT1 |
|              |  | MAPK8 |  | CCNG2  | SOS1   |       | FBN1  |
|              |  | SP3   |  | E2F1   | UTRN   |       | EDF1  |
|              |  |       |  | HIF1A  | VCAM1  |       |       |
|              |  |       |  | SMAD4  | WRN    |       |       |
|              |  |       |  | MMP2   |        |       |       |
|              |  |       |  | MAPK8  |        |       |       |
|              |  |       |  | SOS1   |        |       |       |
|              |  |       |  | TGFBR2 |        |       |       |
|              |  |       |  | KLF11  |        |       |       |
|              |  |       |  | TXNIP  |        |       |       |

**Validated targets  
of miRNAs**

|              |        |       |        |        |       |       |        |
|--------------|--------|-------|--------|--------|-------|-------|--------|
| <b>TFs</b>   | KAT2B  | E2F3  | MYB    | E2F1   | PPARA | KLF4  | SP1    |
|              | NR3C1  | ETS1  | ETS1   | E2F3   |       | AHR   | STAT3  |
|              |        | MYB   | SP1    | MYC    |       | MYC   | SP1    |
|              |        | SP1   | E2F3   | RB1    |       |       | STAT3  |
|              |        | EZH2  | FOXO1  | RUNX1  |       |       | MYC    |
|              |        |       | E2F3   | STAT3  |       |       |        |
|              |        |       |        |        |       |       |        |
|              |        |       |        |        |       |       |        |
|              |        |       |        |        |       |       |        |
| <b>Genes</b> | CTGF   | CREB1 | FLNA   | CCNB1  | HIF1A | MMP2  | COL1A1 |
|              | FMR1   | FN1   | FN1    | E2F1   |       | DNMT1 | DNMT1  |
|              | ATM    | KLF11 | KLF11  | FLNA   |       | FBN1  | MMP2   |
|              | HMGCS1 | ZEB1  | ZEB1   | HIF1A  |       | MYC   | FBN1   |
|              | SMAD4  | DNMT1 | NCAM1  | MYC    |       |       | MYC    |
|              | TGFBR2 |       | CYP1B1 | SMAD4  |       |       |        |
|              | DNMT1  |       |        | TGFBR2 |       |       |        |
|              |        |       |        | DNMT1  |       |       |        |
|              |        |       |        |        |       |       |        |
|              |        |       |        |        |       |       |        |

|        |            |         |         |           |        |        |        |
|--------|------------|---------|---------|-----------|--------|--------|--------|
| miRNAs | miR-342-3p | miR-630 | miR-874 | miR-92a-1 | let-7a | let-7b | let-7g |
|--------|------------|---------|---------|-----------|--------|--------|--------|

**Predicted targets  
of miRNAs**

|              |       |      |        |        |        |        |        |
|--------------|-------|------|--------|--------|--------|--------|--------|
| <b>TFs</b>   | E2F3  | KLF6 | POU2F1 |        | EZH2   | EZH2   | EZH2   |
|              |       | EZH2 | STAT3  |        | POU2F1 | POU2F1 | POU2F1 |
|              |       |      |        |        | RB1    | RB1    | RB1    |
|              |       |      |        |        | TP53   | TP53   | TP53   |
|              |       |      |        |        |        |        |        |
|              |       |      |        |        |        |        |        |
|              |       |      |        |        |        |        |        |
| <b>Genes</b> | DNMT1 |      | FBN1   | COL1A1 | FAS    | FAS    | FAS    |
|              | ZEB1  |      | FMR1   | DACT3  | COL1A1 | COL1A1 | COL1A1 |
|              |       |      | SIGIRR |        | IL6    | IL6    | IL6    |
|              |       |      |        |        | MAPK8  | MAPK8  | MAPK8  |
|              |       |      |        |        | UTRN   | UTRN   | UTRN   |
|              |       |      |        |        |        |        |        |
|              |       |      |        |        |        |        |        |
|              |       |      |        |        |        |        |        |
|              |       |      |        |        |        |        |        |
|              |       |      |        |        |        |        |        |
|              |       |      |        |        |        |        |        |

**Validated targets  
of miRNAs**

|              |       |       |       |         |       |         |     |
|--------------|-------|-------|-------|---------|-------|---------|-----|
| <b>TFs</b>   | FOSL2 | SNAI2 | PARP1 | HDAC1   | E2F1  | CTCF    | MYC |
|              | E2F1  | FOXM1 | HDAC1 | HDGF    | EZH2  | E2F3    |     |
|              |       |       | STAT3 | KAT2B   | MYC   | EZH2    |     |
|              |       |       | E2F3  | MYBL2   | NFKB1 | MYC     |     |
|              |       |       |       | NFKB1   | PARP1 | SOX9    |     |
|              |       |       |       | STAT3   | SP1   | SP1     |     |
|              |       |       |       | HDAC2   | STAT3 |         |     |
|              |       |       |       | KLF4    |       |         |     |
|              |       |       |       | IKZF1   |       |         |     |
|              |       |       |       |         |       |         |     |
| <b>Genes</b> | DNMT1 | SNAI2 |       | ATM     | MYC   | BIRC5   | MYC |
|              | E2F1  |       |       | CCNB1   | HRAS  | CCNB1   | FN1 |
|              |       |       |       | EPB41L3 | E2F1  | EPB41L3 |     |
|              |       |       |       | FLNA    | IL6   | FLNA    |     |
|              |       |       |       | HMGCS1  |       | HIF1A   |     |
|              |       |       |       | SMAD4   |       | HMGCS1  |     |
|              |       |       |       | TGFBR2  |       | MYC     |     |
|              |       |       |       | TYMP    |       | UTRN    |     |
|              |       |       |       | MAPK8   |       | HRAS    |     |
|              |       |       |       | DNMT1   |       |         |     |





### H19-KLF6-TXNIP

|        |          |             |            |         |         |            |            |
|--------|----------|-------------|------------|---------|---------|------------|------------|
| miRNAs | miR-106a | miR-130b-3p | miR-138-5p | miR-139 | miR-141 | miR-152-3p | miR-152-5p |
|--------|----------|-------------|------------|---------|---------|------------|------------|

#### Predicted targets of miRNAs

|              |        |        |        |       |        |       |       |
|--------------|--------|--------|--------|-------|--------|-------|-------|
| <b>TFs</b>   | RUNX1  | FOSL2  | EZH2   | ETS1  | CREBBP | KLF6  | KLF6  |
|              | E2F1   | MYB    | POU2F1 |       | POU2F1 | KLF4  | E2F3  |
|              | PPARA  | STAT3  | RELA   |       |        |       | KLF4  |
|              | RB1    |        | SP1    |       |        |       |       |
|              | SP1    |        |        |       |        |       |       |
|              | STAT3  |        |        |       |        |       |       |
|              | KAT2B  |        |        |       |        |       |       |
|              |        |        |        |       |        |       |       |
|              |        |        |        |       |        |       |       |
| <b>Genes</b> | CALD1  | FMR1   | HIF1A  | FMR1  | FMR1   | CHUK  | DNMT1 |
|              | CCNG2  | MET    | KLF11  | MAPK8 |        | DNMT1 | FBN1  |
|              | E2F1   | TGFBR2 |        | ZEB1  |        | FBN1  | FMR1  |
|              | HIF1A  |        |        |       |        | FMR1  | SOS1  |
|              | SMAD4  |        |        |       |        | SOS1  |       |
|              | MMP2   |        |        |       |        |       |       |
|              | MAPK8  |        |        |       |        |       |       |
|              | SOS1   |        |        |       |        |       |       |
|              | TGFBR2 |        |        |       |        |       |       |
|              | KLF11  |        |        |       |        |       |       |
|              | TXNIP  |        |        |       |        |       |       |

#### Validated targets of miRNAs

|              |        |        |        |       |          |        |  |
|--------------|--------|--------|--------|-------|----------|--------|--|
| <b>TFs</b>   | E2F1   | AHR    | EZH2   | NFKB1 | E2F3     | KLF4   |  |
|              | MYB    | E2F1   | NFKB1  |       | PPARA    |        |  |
|              | RB1    | NR3C1  | SNAI2  |       | HDGF     |        |  |
|              | RUNX1  | PPARA  | SOX9   |       | KLF6???? |        |  |
|              | STAT3  | RB1    | TWIST2 |       |          |        |  |
|              |        | STAT3  |        |       |          |        |  |
|              |        |        |        |       |          |        |  |
|              |        |        |        |       |          |        |  |
|              |        |        |        |       |          |        |  |
|              |        |        |        |       |          |        |  |
| <b>Genes</b> | E2F1   | E2F1   | HIF1A  | HRAS  | ZEB1     | DNMT1  |  |
|              | FAS    | KLF11  | SNAI2  | MET   | EIF4E    | ADAM17 |  |
|              | TGFBR2 | SMAD4  |        |       | KLF11    |        |  |
|              | ATM    | TGFBR2 |        |       | ZEB1     |        |  |
|              | HIF1A  | ZEB1   |        |       |          |        |  |
|              |        | FMR1   |        |       |          |        |  |
|              |        | MMP2   |        |       |          |        |  |
|              |        |        |        |       |          |        |  |
|              |        |        |        |       |          |        |  |
|              |        |        |        |       |          |        |  |

|        |        |             |             |         |            |          |         |
|--------|--------|-------------|-------------|---------|------------|----------|---------|
| miRNAs | miR-17 | miR-181d-3p | miR-181d-5p | miR-18a | miR-194-5p | miR-196a | miR-19a |
|--------|--------|-------------|-------------|---------|------------|----------|---------|

**Predicted targets  
of miRNAs**

|              |        |  |         |        |      |        |      |
|--------------|--------|--|---------|--------|------|--------|------|
| <b>TFs</b>   | RUNX1  |  | RUNX1   | RUNX1  | E2F3 | ERG    |      |
|              | E2F1   |  | KLF6    | KLF6   | FLI1 | FLI1   |      |
|              | RB1    |  | ETS1    | NR3C1  | SP3  |        |      |
|              | STAT3  |  | NR3C1   | POU2F1 |      |        |      |
|              | KAT2B  |  | KAT2B   |        |      |        |      |
|              |        |  |         |        |      |        |      |
|              |        |  |         |        |      |        |      |
|              |        |  |         |        |      |        |      |
| <b>Genes</b> | CALD1  |  | ATM     | ATM    | ACP5 | FAS    | FMR1 |
|              | CCNG2  |  | SOS1    | CTGF   | FMR1 | COL1A1 | IL18 |
|              | E2F1   |  | VCAM1   | HIF1A  | SP3  | MAPK8  |      |
|              | HIF1A  |  | EPB41L3 | HMGCS1 | RSF1 | ZEB1   |      |
|              | MMP2   |  |         | MAPK8  |      |        |      |
|              | SOS1   |  |         |        |      |        |      |
|              | TGFBR2 |  |         |        |      |        |      |
|              | KLF11  |  |         |        |      |        |      |
|              | TXNIP  |  |         |        |      |        |      |
|              |        |  |         |        |      |        |      |
|              |        |  |         |        |      |        |      |

**Validated targets  
of miRNAs**

|              |        |  |      |        |       |        |        |
|--------------|--------|--|------|--------|-------|--------|--------|
| <b>TFs</b>   | E2F1   |  |      | NR3C1  | FOXM1 | FOXO1  | KAT2B  |
|              | E2F3   |  |      | RUNX1  |       |        |        |
|              | KAT2B  |  |      |        |       |        |        |
|              | MYC    |  |      |        |       |        |        |
|              | RB1    |  |      |        |       |        |        |
|              | RUNX1  |  |      |        |       |        |        |
|              | STAT3  |  |      |        |       |        |        |
|              |        |  |      |        |       |        |        |
|              |        |  |      |        |       |        |        |
|              |        |  |      |        |       |        |        |
|              |        |  |      |        |       |        |        |
| <b>Genes</b> | E2F1   |  | HRAS | CTGF   |       | FLNA   | CTGF   |
|              | MMP2   |  |      | EDF1   |       | TGFBR2 | SMAD4  |
|              | MYC    |  |      | ATM    |       |        | TGFBR2 |
|              | SMAD4  |  |      | HIF1A  |       |        | DNMT1  |
|              | TGFBR2 |  |      | HMGCS1 |       |        |        |
|              | HIF1A  |  |      | SMAD4  |       |        |        |
|              | DNMT1  |  |      | TGFBR2 |       |        |        |
|              | IGFBP3 |  |      | DNMT1  |       |        |        |
|              |        |  |      |        |       |        |        |
|              |        |  |      |        |       |        |        |

|        |           |          |          |         |        |         |         |
|--------|-----------|----------|----------|---------|--------|---------|---------|
| miRNAs | miR-19b-1 | miR-200b | miR-200c | miR-20a | miR-22 | miR-29a | miR-29b |
|--------|-----------|----------|----------|---------|--------|---------|---------|

**Predicted targets  
of miRNAs**

|              |  |             |  |              |        |       |       |
|--------------|--|-------------|--|--------------|--------|-------|-------|
| <b>TFs</b>   |  | <b>KLF6</b> |  | E2F1         | FOXO1  | ETS1  | MYBL2 |
|              |  | SP3         |  | E2F3         | HNRNPK | KAT2B |       |
|              |  |             |  | EZH2         |        |       |       |
|              |  |             |  | PPARA        |        |       |       |
|              |  |             |  | RB1          |        |       |       |
|              |  |             |  | STAT3        |        |       |       |
|              |  |             |  | KAT2B        |        |       |       |
|              |  |             |  |              |        |       |       |
| <b>Genes</b> |  | NCF2        |  | CALD1        | CD68   |       | DNMT1 |
|              |  | MAPK8       |  | CCNG2        | SOS1   |       | FBN1  |
|              |  | SP3         |  | E2F1         | UTRN   |       | EDF1  |
|              |  |             |  | HIF1A        | VCAM1  |       |       |
|              |  |             |  | SMAD4        | WRN    |       |       |
|              |  |             |  | MMP2         |        |       |       |
|              |  |             |  | MAPK8        |        |       |       |
|              |  |             |  | SOS1         |        |       |       |
|              |  |             |  | TGFBR2       |        |       |       |
|              |  |             |  | KLF11        |        |       |       |
|              |  |             |  | <b>TXNIP</b> |        |       |       |

**Validated targets  
of miRNAs**

|              |        |       |        |        |       |       |        |
|--------------|--------|-------|--------|--------|-------|-------|--------|
| <b>TFs</b>   | KAT2B  | E2F3  | MYB    | E2F1   | PPARA | KLF4  | SP1    |
|              | NR3C1  | ETS1  | ETS1   | E2F3   |       | AHR   | STAT3  |
|              |        | MYB   | SP1    | MYC    |       | MYC   | SP1    |
|              |        | SP1   | E2F3   | RB1    |       |       | STAT3  |
|              |        | EZH2  | FOXO1  | RUNX1  |       |       | MYC    |
|              |        |       | E2F3   | STAT3  |       |       |        |
|              |        |       |        |        |       |       |        |
|              |        |       |        |        |       |       |        |
|              |        |       |        |        |       |       |        |
| <b>Genes</b> | CTGF   | CREB1 | FLNA   | CCNB1  | HIF1A | MMP2  | COL1A1 |
|              | FMR1   | FN1   | FN1    | E2F1   |       | DNMT1 | DNMT1  |
|              | ATM    | KLF11 | KLF11  | FLNA   |       | FBN1  | MMP2   |
|              | HMGCS1 | ZEB1  | ZEB1   | HIF1A  |       | MYC   | FBN1   |
|              | SMAD4  | DNMT1 | NCAM1  | MYC    |       |       | MYC    |
|              | TGFBR2 |       | CYP1B1 | SMAD4  |       |       |        |
|              | DNMT1  |       |        | TGFBR2 |       |       |        |
|              |        |       |        | DNMT1  |       |       |        |
|              |        |       |        |        |       |       |        |
|              |        |       |        |        |       |       |        |

|        |            |         |         |           |        |        |        |
|--------|------------|---------|---------|-----------|--------|--------|--------|
| miRNAs | miR-342-3p | miR-630 | miR-874 | miR-92a-1 | let-7a | let-7b | let-7g |
|--------|------------|---------|---------|-----------|--------|--------|--------|

**Predicted targets  
of miRNAs**

|              |       |      |        |        |        |        |        |
|--------------|-------|------|--------|--------|--------|--------|--------|
| <b>TFs</b>   | E2F3  | KLF6 | POU2F1 |        | EZH2   | EZH2   | EZH2   |
|              |       | EZH2 | STAT3  |        | POU2F1 | POU2F1 | POU2F1 |
|              |       |      |        |        | RB1    | RB1    | RB1    |
|              |       |      |        |        | TP53   | TP53   | TP53   |
|              |       |      |        |        |        |        |        |
|              |       |      |        |        |        |        |        |
|              |       |      |        |        |        |        |        |
|              |       |      |        |        |        |        |        |
| <b>Genes</b> | DNMT1 |      | FBN1   | COL1A1 | FAS    | FAS    | FAS    |
|              | ZEB1  |      | FMR1   | DACT3  | COL1A1 | COL1A1 | COL1A1 |
|              |       |      | SIGIRR |        | IL6    | IL6    | IL6    |
|              |       |      |        |        | MAPK8  | MAPK8  | MAPK8  |
|              |       |      |        |        | UTRN   | UTRN   | UTRN   |
|              |       |      |        |        |        |        |        |
|              |       |      |        |        |        |        |        |
|              |       |      |        |        |        |        |        |
|              |       |      |        |        |        |        |        |
|              |       |      |        |        |        |        |        |
|              |       |      |        |        |        |        |        |

**Validated targets  
of miRNAs**

|              |       |       |       |         |       |         |     |
|--------------|-------|-------|-------|---------|-------|---------|-----|
| <b>TFs</b>   | FOSL2 | SNAI2 | PARP1 | HDAC1   | E2F1  | CTCF    | MYC |
|              | E2F1  | FOXM1 | HDAC1 | HDGF    | EZH2  | E2F3    |     |
|              |       |       | STAT3 | KAT2B   | MYC   | EZH2    |     |
|              |       |       | E2F3  | MYBL2   | NFKB1 | MYC     |     |
|              |       |       |       | NFKB1   | PARP1 | SOX9    |     |
|              |       |       |       | STAT3   | SP1   | SP1     |     |
|              |       |       |       | HDAC2   | STAT3 |         |     |
|              |       |       |       | KLF4    |       |         |     |
|              |       |       |       | IKZF1   |       |         |     |
|              |       |       |       |         |       |         |     |
|              |       |       |       |         |       |         |     |
| <b>Genes</b> | DNMT1 | SNAI2 |       | ATM     | MYC   | BIRC5   | MYC |
|              | E2F1  |       |       | CCNB1   | HRAS  | CCNB1   | FN1 |
|              |       |       |       | EPB41L3 | E2F1  | EPB41L3 |     |
|              |       |       |       | FLNA    | IL6   | FLNA    |     |
|              |       |       |       | HMGCS1  |       | HIF1A   |     |
|              |       |       |       | SMAD4   |       | HMGCS1  |     |
|              |       |       |       | TGFBR2  |       | MYC     |     |
|              |       |       |       | TYMP    |       | UTRN    |     |
|              |       |       |       | MAPK8   |       | HRAS    |     |
|              |       |       |       | DNMT1   |       |         |     |



### H19-PPARA-KLF11

|        |          |             |            |         |         |            |            |
|--------|----------|-------------|------------|---------|---------|------------|------------|
| miRNAs | miR-106a | miR-130b-3p | miR-138-5p | miR-139 | miR-141 | miR-152-3p | miR-152-5p |
|--------|----------|-------------|------------|---------|---------|------------|------------|

#### Predicted targets of miRNAs

|              |        |        |        |       |        |       |       |
|--------------|--------|--------|--------|-------|--------|-------|-------|
| <b>TFs</b>   | RUNX1  | FOSL2  | EZH2   | ETS1  | CREBBP | KLF6  | KLF6  |
|              | E2F1   | MYB    | POU2F1 |       | POU2F1 | KLF4  | E2F3  |
|              | PPARA  | STAT3  | RELA   |       |        |       | KLF4  |
|              | RB1    |        | SP1    |       |        |       |       |
|              | SP1    |        |        |       |        |       |       |
|              | STAT3  |        |        |       |        |       |       |
|              | KAT2B  |        |        |       |        |       |       |
|              |        |        |        |       |        |       |       |
|              |        |        |        |       |        |       |       |
| <b>Genes</b> | CALD1  | FMR1   | HIF1A  | FMR1  | FMR1   | CHUK  | DNMT1 |
|              | CCNG2  | MET    | KLF11  | MAPK8 |        | DNMT1 | FBN1  |
|              | E2F1   | TGFBR2 |        | ZEB1  |        | FBN1  | FMR1  |
|              | HIF1A  |        |        |       |        | FMR1  | SOS1  |
|              | SMAD4  |        |        |       |        | SOS1  |       |
|              | MMP2   |        |        |       |        |       |       |
|              | MAPK8  |        |        |       |        |       |       |
|              | SOS1   |        |        |       |        |       |       |
|              | TGFBR2 |        |        |       |        |       |       |
|              | KLF11  |        |        |       |        |       |       |
|              | TXNIP  |        |        |       |        |       |       |

#### Validated targets of miRNAs

|              |        |        |        |       |       |        |  |
|--------------|--------|--------|--------|-------|-------|--------|--|
| <b>TFs</b>   | E2F1   | AHR    | EZH2   | NFKB1 | E2F3  | KLF4   |  |
|              | MYB    | E2F1   | NFKB1  |       | PPARA |        |  |
|              | RB1    | NR3C1  | SNAI2  |       | HDGF  |        |  |
|              | RUNX1  | PPARA  | SOX9   |       |       |        |  |
|              | STAT3  | RB1    | TWIST2 |       |       |        |  |
|              |        | STAT3  |        |       |       |        |  |
|              |        |        |        |       |       |        |  |
|              |        |        |        |       |       |        |  |
|              |        |        |        |       |       |        |  |
|              |        |        |        |       |       |        |  |
| <b>Genes</b> | E2F1   | E2F1   | HIF1A  | HRAS  | ZEB1  | DNMT1  |  |
|              | FAS    | KLF11  | SNAI2  | MET   | EIF4E | ADAM17 |  |
|              | TGFBR2 | SMAD4  |        |       | KLF11 |        |  |
|              | ATM    | TGFBR2 |        |       | ZEB1  |        |  |
|              | HIF1A  | ZEB1   |        |       |       |        |  |
|              |        | FMR1   |        |       |       |        |  |
|              |        | MMP2   |        |       |       |        |  |
|              |        |        |        |       |       |        |  |
|              |        |        |        |       |       |        |  |
|              |        |        |        |       |       |        |  |

|        |        |             |             |         |            |          |         |
|--------|--------|-------------|-------------|---------|------------|----------|---------|
| miRNAs | miR-17 | miR-181d-3p | miR-181d-5p | miR-18a | miR-194-5p | miR-196a | miR-19a |
|--------|--------|-------------|-------------|---------|------------|----------|---------|

**Predicted targets  
of miRNAs**

|              |        |  |         |        |      |        |      |
|--------------|--------|--|---------|--------|------|--------|------|
| <b>TFs</b>   | RUNX1  |  | RUNX1   | RUNX1  | E2F3 | ERG    |      |
|              | E2F1   |  | KLF6    | KLF6   | FLI1 | FLI1   |      |
|              | RB1    |  | ETS1    | NR3C1  | SP3  |        |      |
|              | STAT3  |  | NR3C1   | POU2F1 |      |        |      |
|              | KAT2B  |  | KAT2B   |        |      |        |      |
|              |        |  |         |        |      |        |      |
|              |        |  |         |        |      |        |      |
|              |        |  |         |        |      |        |      |
| <b>Genes</b> | CALD1  |  | ATM     | ATM    | ACP5 | FAS    | FMR1 |
|              | CCNG2  |  | SOS1    | CTGF   | FMR1 | COL1A1 | IL18 |
|              | E2F1   |  | VCAM1   | HIF1A  | SP3  | MAPK8  |      |
|              | HIF1A  |  | EPB41L3 | HMGCS1 | RSF1 | ZEB1   |      |
|              | MMP2   |  |         | MAPK8  |      |        |      |
|              | SOS1   |  |         |        |      |        |      |
|              | TGFBR2 |  |         |        |      |        |      |
|              | KLF11  |  |         |        |      |        |      |
|              | TXNIP  |  |         |        |      |        |      |
|              |        |  |         |        |      |        |      |
|              |        |  |         |        |      |        |      |

**Validated targets  
of miRNAs**

|              |        |  |      |        |       |        |        |
|--------------|--------|--|------|--------|-------|--------|--------|
| <b>TFs</b>   | E2F1   |  |      | NR3C1  | FOXO1 | FOXO1  | KAT2B  |
|              | E2F3   |  |      | RUNX1  |       |        |        |
|              | KAT2B  |  |      |        |       |        |        |
|              | MYC    |  |      |        |       |        |        |
|              | RB1    |  |      |        |       |        |        |
|              | RUNX1  |  |      |        |       |        |        |
|              | STAT3  |  |      |        |       |        |        |
|              |        |  |      |        |       |        |        |
|              |        |  |      |        |       |        |        |
|              |        |  |      |        |       |        |        |
| <b>Genes</b> | E2F1   |  | HRAS | CTGF   |       | FLNA   | CTGF   |
|              | MMP2   |  |      | EDF1   |       | TGFBR2 | SMAD4  |
|              | MYC    |  |      | ATM    |       |        | TGFBR2 |
|              | SMAD4  |  |      | HIF1A  |       |        | DNMT1  |
|              | TGFBR2 |  |      | HMGCS1 |       |        |        |
|              | HIF1A  |  |      | SMAD4  |       |        |        |
|              | DNMT1  |  |      | TGFBR2 |       |        |        |
|              | IGFBP3 |  |      | DNMT1  |       |        |        |
|              |        |  |      |        |       |        |        |
|              |        |  |      |        |       |        |        |



|        |           |          |          |         |        |         |         |
|--------|-----------|----------|----------|---------|--------|---------|---------|
| miRNAs | miR-19b-1 | miR-200b | miR-200c | miR-20a | miR-22 | miR-29a | miR-29b |
|--------|-----------|----------|----------|---------|--------|---------|---------|

**Predicted targets  
of miRNAs**

|              |  |       |  |        |        |       |       |
|--------------|--|-------|--|--------|--------|-------|-------|
| <b>TFs</b>   |  | KLF6  |  | E2F1   | FOXO1  | ETS1  | MYBL2 |
|              |  | SP3   |  | E2F3   | HNRNPK | KAT2B |       |
|              |  |       |  | EZH2   |        |       |       |
|              |  |       |  | PPARA  |        |       |       |
|              |  |       |  | RB1    |        |       |       |
|              |  |       |  | STAT3  |        |       |       |
|              |  |       |  | KAT2B  |        |       |       |
|              |  |       |  |        |        |       |       |
| <b>Genes</b> |  | NCF2  |  | CALD1  | CD68   |       | DNMT1 |
|              |  | MAPK8 |  | CCNG2  | SOS1   |       | FBN1  |
|              |  | SP3   |  | E2F1   | UTRN   |       | EDF1  |
|              |  |       |  | HIF1A  | VCAM1  |       |       |
|              |  |       |  | SMAD4  | WRN    |       |       |
|              |  |       |  | MMP2   |        |       |       |
|              |  |       |  | MAPK8  |        |       |       |
|              |  |       |  | SOS1   |        |       |       |
|              |  |       |  | TGFBR2 |        |       |       |
|              |  |       |  | KLF11  |        |       |       |
|              |  |       |  | TXNIP  |        |       |       |

**Validated targets  
of miRNAs**

|              |        |       |        |        |       |       |        |
|--------------|--------|-------|--------|--------|-------|-------|--------|
| <b>TFs</b>   | KAT2B  | E2F3  | MYB    | E2F1   | PPARA | KLF4  | SP1    |
|              | NR3C1  | ETS1  | ETS1   | E2F3   |       | AHR   | STAT3  |
|              |        | MYB   | SP1    | MYC    |       | MYC   | SP1    |
|              |        | SP1   | E2F3   | RB1    |       |       | STAT3  |
|              |        | EZH2  | FOXO1  | RUNX1  |       |       | MYC    |
|              |        |       | E2F3   | STAT3  |       |       |        |
|              |        |       |        |        |       |       |        |
|              |        |       |        |        |       |       |        |
|              |        |       |        |        |       |       |        |
|              |        |       |        |        |       |       |        |
| <b>Genes</b> | CTGF   | CREB1 | FLNA   | CCNB1  | HIF1A | MMP2  | COL1A1 |
|              | FMR1   | FN1   | FN1    | E2F1   |       | DNMT1 | DNMT1  |
|              | ATM    | KLF11 | KLF11  | FLNA   |       | FBN1  | MMP2   |
|              | HMGCS1 | ZEB1  | ZEB1   | HIF1A  |       | MYC   | FBN1   |
|              | SMAD4  | DNMT1 | NCAM1  | MYC    |       |       | MYC    |
|              | TGFBR2 |       | CYP1B1 | SMAD4  |       |       |        |
|              | DNMT1  |       |        | TGFBR2 |       |       |        |
|              |        |       |        | DNMT1  |       |       |        |
|              |        |       |        |        |       |       |        |
|              |        |       |        |        |       |       |        |

|        |            |         |         |           |        |        |        |
|--------|------------|---------|---------|-----------|--------|--------|--------|
| miRNAs | miR-342-3p | miR-630 | miR-874 | miR-92a-1 | let-7a | let-7b | let-7g |
|--------|------------|---------|---------|-----------|--------|--------|--------|

**Predicted targets  
of miRNAs**

|              |       |      |        |        |        |        |        |
|--------------|-------|------|--------|--------|--------|--------|--------|
| <b>TFs</b>   | E2F3  | KLF6 | POU2F1 |        | EZH2   | EZH2   | EZH2   |
|              |       | EZH2 | STAT3  |        | POU2F1 | POU2F1 | POU2F1 |
|              |       |      |        |        | RB1    | RB1    | RB1    |
|              |       |      |        |        | TP53   | TP53   | TP53   |
|              |       |      |        |        |        |        |        |
|              |       |      |        |        |        |        |        |
|              |       |      |        |        |        |        |        |
|              |       |      |        |        |        |        |        |
| <b>Genes</b> | DNMT1 |      | FBN1   | COL1A1 | FAS    | FAS    | FAS    |
|              | ZEB1  |      | FMR1   | DACT3  | COL1A1 | COL1A1 | COL1A1 |
|              |       |      | SIGIRR |        | IL6    | IL6    | IL6    |
|              |       |      |        |        | MAPK8  | MAPK8  | MAPK8  |
|              |       |      |        |        | UTRN   | UTRN   | UTRN   |
|              |       |      |        |        |        |        |        |
|              |       |      |        |        |        |        |        |
|              |       |      |        |        |        |        |        |
|              |       |      |        |        |        |        |        |
|              |       |      |        |        |        |        |        |
|              |       |      |        |        |        |        |        |
|              |       |      |        |        |        |        |        |

**Validated targets  
of miRNAs**

|              |       |       |       |         |       |         |     |
|--------------|-------|-------|-------|---------|-------|---------|-----|
| <b>TFs</b>   | FOSL2 | SNAI2 | PARP1 | HDAC1   | E2F1  | CTCF    | MYC |
|              | E2F1  | FOXM1 | HDAC1 | HDGF    | EZH2  | E2F3    |     |
|              |       |       | STAT3 | KAT2B   | MYC   | EZH2    |     |
|              |       |       | E2F3  | MYBL2   | NFKB1 | MYC     |     |
|              |       |       |       | NFKB1   | PARP1 | SOX9    |     |
|              |       |       |       | STAT3   | SP1   | SP1     |     |
|              |       |       |       | HDAC2   | STAT3 |         |     |
|              |       |       |       | KLF4    |       |         |     |
|              |       |       |       | IKZF1   |       |         |     |
|              |       |       |       |         |       |         |     |
|              |       |       |       |         |       |         |     |
| <b>Genes</b> | DNMT1 | SNAI2 |       | ATM     | MYC   | BIRC5   | MYC |
|              | E2F1  |       |       | CCNB1   | HRAS  | CCNB1   | FN1 |
|              |       |       |       | EPB41L3 | E2F1  | EPB41L3 |     |
|              |       |       |       | FLNA    | IL6   | FLNA    |     |
|              |       |       |       | HMGCS1  |       | HIF1A   |     |
|              |       |       |       | SMAD4   |       | HMGCS1  |     |
|              |       |       |       | TGFBR2  |       | MYC     |     |
|              |       |       |       | TYMP    |       | UTRN    |     |
|              |       |       |       | MAPK8   |       | HRAS    |     |
|              |       |       |       | DNMT1   |       |         |     |



### H19-SP1-TGFBR2

|        |          |             |            |         |         |            |            |
|--------|----------|-------------|------------|---------|---------|------------|------------|
| miRNAs | miR-106a | miR-130b-3p | miR-138-5p | miR-139 | miR-141 | miR-152-3p | miR-152-5p |
|--------|----------|-------------|------------|---------|---------|------------|------------|

#### Predicted targets of miRNAs

|              |        |        |        |       |        |       |       |
|--------------|--------|--------|--------|-------|--------|-------|-------|
| <b>TFs</b>   | RUNX1  | FOSL2  | EZH2   | ETS1  | CREBBP | KLF6  | KLF6  |
|              | E2F1   | MYB    | POU2F1 |       | POU2F1 | KLF4  | E2F3  |
|              | PPARA  | STAT3  | RELA   |       |        |       | KLF4  |
|              | RB1    |        | SP1    |       |        |       |       |
|              | SP1    |        |        |       |        |       |       |
|              | STAT3  |        |        |       |        |       |       |
|              | KAT2B  |        |        |       |        |       |       |
|              |        |        |        |       |        |       |       |
|              |        |        |        |       |        |       |       |
| <b>Genes</b> | CALD1  | FMR1   | HIF1A  | FMR1  | FMR1   | CHUK  | DNMT1 |
|              | CCNG2  | MET    | KLF11  | MAPK8 |        | DNMT1 | FBN1  |
|              | E2F1   | TGFBR2 |        | ZEB1  |        | FBN1  | FMR1  |
|              | HIF1A  |        |        |       |        | FMR1  | SOS1  |
|              | SMAD4  |        |        |       |        | SOS1  |       |
|              | MMP2   |        |        |       |        |       |       |
|              | MAPK8  |        |        |       |        |       |       |
|              | SOS1   |        |        |       |        |       |       |
|              | TGFBR2 |        |        |       |        |       |       |
|              | KLF11  |        |        |       |        |       |       |
|              | TXNIP  |        |        |       |        |       |       |

#### Validated targets of miRNAs

|              |        |        |        |       |       |        |  |
|--------------|--------|--------|--------|-------|-------|--------|--|
| <b>TFs</b>   | E2F1   | AHR    | EZH2   | NFKB1 | E2F3  | KLF4   |  |
|              | MYB    | E2F1   | NFKB1  |       | PPARA |        |  |
|              | RB1    | NR3C1  | SNAI2  |       | HDGF  |        |  |
|              | RUNX1  | PPARA  | SOX9   |       |       |        |  |
|              | STAT3  | RB1    | TWIST2 |       |       |        |  |
|              |        | STAT3  |        |       |       |        |  |
|              |        |        |        |       |       |        |  |
|              |        |        |        |       |       |        |  |
|              |        |        |        |       |       |        |  |
|              |        |        |        |       |       |        |  |
|              |        |        |        |       |       |        |  |
| <b>Genes</b> | E2F1   | E2F1   | HIF1A  | HRAS  | ZEB1  | DNMT1  |  |
|              | FAS    | KLF11  | SNAI2  | MET   | EIF4E | ADAM17 |  |
|              | TGFBR2 | SMAD4  |        |       | KLF11 |        |  |
|              | ATM    | TGFBR2 |        |       | ZEB1  |        |  |
|              | HIF1A  | ZEB1   |        |       |       |        |  |
|              |        | FMR1   |        |       |       |        |  |
|              |        | MMP2   |        |       |       |        |  |
|              |        |        |        |       |       |        |  |
|              |        |        |        |       |       |        |  |
|              |        |        |        |       |       |        |  |

|        |        |             |             |         |            |          |         |
|--------|--------|-------------|-------------|---------|------------|----------|---------|
| miRNAs | miR-17 | miR-181d-3p | miR-181d-5p | miR-18a | miR-194-5p | miR-196a | miR-19a |
|--------|--------|-------------|-------------|---------|------------|----------|---------|

**Predicted targets  
of miRNAs**

|              |        |  |         |        |      |        |      |
|--------------|--------|--|---------|--------|------|--------|------|
| <b>TFs</b>   | RUNX1  |  | RUNX1   | RUNX1  | E2F3 | ERG    |      |
|              | E2F1   |  | KLF6    | KLF6   | FLI1 | FLI1   |      |
|              | RB1    |  | ETS1    | NR3C1  | SP3  |        |      |
|              | STAT3  |  | NR3C1   | POU2F1 |      |        |      |
|              | KAT2B  |  | KAT2B   |        |      |        |      |
|              |        |  |         |        |      |        |      |
|              |        |  |         |        |      |        |      |
|              |        |  |         |        |      |        |      |
| <b>Genes</b> | CALD1  |  | ATM     | ATM    | ACP5 | FAS    | FMR1 |
|              | CCNG2  |  | SOS1    | CTGF   | FMR1 | COL1A1 | IL18 |
|              | E2F1   |  | VCAM1   | HIF1A  | SP3  | MAPK8  |      |
|              | HIF1A  |  | EPB41L3 | HMGCS1 | RSF1 | ZEB1   |      |
|              | MMP2   |  |         | MAPK8  |      |        |      |
|              | SOS1   |  |         |        |      |        |      |
|              | TGFBR2 |  |         |        |      |        |      |
|              | KLF11  |  |         |        |      |        |      |
|              | TXNIP  |  |         |        |      |        |      |
|              |        |  |         |        |      |        |      |
|              |        |  |         |        |      |        |      |

**Validated targets  
of miRNAs**

|              |        |  |      |        |       |        |        |
|--------------|--------|--|------|--------|-------|--------|--------|
| <b>TFs</b>   | E2F1   |  |      | NR3C1  | FOXO1 | FOXO1  | KAT2B  |
|              | E2F3   |  |      | RUNX1  |       |        |        |
|              | KAT2B  |  |      |        |       |        |        |
|              | MYC    |  |      |        |       |        |        |
|              | RB1    |  |      |        |       |        |        |
|              | RUNX1  |  |      |        |       |        |        |
|              | STAT3  |  |      |        |       |        |        |
|              |        |  |      |        |       |        |        |
|              |        |  |      |        |       |        |        |
|              |        |  |      |        |       |        |        |
| <b>Genes</b> | E2F1   |  | HRAS | CTGF   |       | FLNA   | CTGF   |
|              | MMP2   |  |      | EDF1   |       | TGFBR2 | SMAD4  |
|              | MYC    |  |      | ATM    |       |        | TGFBR2 |
|              | SMAD4  |  |      | HIF1A  |       |        | DNMT1  |
|              | TGFBR2 |  |      | HMGCS1 |       |        |        |
|              | HIF1A  |  |      | SMAD4  |       |        |        |
|              | DNMT1  |  |      | TGFBR2 |       |        |        |
|              | IGFBP3 |  |      | DNMT1  |       |        |        |
|              |        |  |      |        |       |        |        |
|              |        |  |      |        |       |        |        |

|        |           |          |          |         |        |         |         |
|--------|-----------|----------|----------|---------|--------|---------|---------|
| miRNAs | miR-19b-1 | miR-200b | miR-200c | miR-20a | miR-22 | miR-29a | miR-29b |
|--------|-----------|----------|----------|---------|--------|---------|---------|

**Predicted targets  
of miRNAs**

|              |  |       |  |        |        |       |       |
|--------------|--|-------|--|--------|--------|-------|-------|
| <b>TFs</b>   |  | KLF6  |  | E2F1   | FOXO1  | ETS1  | MYBL2 |
|              |  | SP3   |  | E2F3   | HNRNPK | KAT2B |       |
|              |  |       |  | EZH2   |        |       |       |
|              |  |       |  | PPARA  |        |       |       |
|              |  |       |  | RB1    |        |       |       |
|              |  |       |  | STAT3  |        |       |       |
|              |  |       |  | KAT2B  |        |       |       |
|              |  |       |  |        |        |       |       |
| <b>Genes</b> |  | NCF2  |  | CALD1  | CD68   |       | DNMT1 |
|              |  | MAPK8 |  | CCNG2  | SOS1   |       | FBN1  |
|              |  | SP3   |  | E2F1   | UTRN   |       | EDF1  |
|              |  |       |  | HIF1A  | VCAM1  |       |       |
|              |  |       |  | SMAD4  | WRN    |       |       |
|              |  |       |  | MMP2   |        |       |       |
|              |  |       |  | MAPK8  |        |       |       |
|              |  |       |  | SOS1   |        |       |       |
|              |  |       |  | TGFBR2 |        |       |       |
|              |  |       |  | KLF11  |        |       |       |
|              |  |       |  | TXNIP  |        |       |       |

**Validated targets  
of miRNAs**

|              |        |       |        |        |       |       |        |
|--------------|--------|-------|--------|--------|-------|-------|--------|
| <b>TFs</b>   | KAT2B  | E2F3  | MYB    | E2F1   | PPARA | KLF4  | SP1    |
|              | NR3C1  | ETS1  | ETS1   | E2F3   |       | AHR   | STAT3  |
|              |        | MYB   | SP1    | MYC    |       | MYC   | SP1    |
|              |        | SP1   | E2F3   | RB1    |       |       | STAT3  |
|              |        | EZH2  | FOXO1  | RUNX1  |       |       | MYC    |
|              |        |       | E2F3   | STAT3  |       |       |        |
|              |        |       |        |        |       |       |        |
|              |        |       |        |        |       |       |        |
|              |        |       |        |        |       |       |        |
|              |        |       |        |        |       |       |        |
| <b>Genes</b> | CTGF   | CREB1 | FLNA   | CCNB1  | HIF1A | MMP2  | COL1A1 |
|              | FMR1   | FN1   | FN1    | E2F1   |       | DNMT1 | DNMT1  |
|              | ATM    | KLF11 | KLF11  | FLNA   |       | FBN1  | MMP2   |
|              | HMGCS1 | ZEB1  | ZEB1   | HIF1A  |       | MYC   | FBN1   |
|              | SMAD4  | DNMT1 | NCAM1  | MYC    |       |       | MYC    |
|              | TGFBR2 |       | CYP1B1 | SMAD4  |       |       |        |
|              | DNMT1  |       |        | TGFBR2 |       |       |        |
|              |        |       |        | DNMT1  |       |       |        |
|              |        |       |        |        |       |       |        |
|              |        |       |        |        |       |       |        |

|        |            |         |         |           |        |        |        |
|--------|------------|---------|---------|-----------|--------|--------|--------|
| miRNAs | miR-342-3p | miR-630 | miR-874 | miR-92a-1 | let-7a | let-7b | let-7g |
|--------|------------|---------|---------|-----------|--------|--------|--------|

**Predicted targets  
of miRNAs**

|              |       |      |        |        |        |        |        |
|--------------|-------|------|--------|--------|--------|--------|--------|
| <b>TFs</b>   | E2F3  | KLF6 | POU2F1 |        | EZH2   | EZH2   | EZH2   |
|              |       | EZH2 | STAT3  |        | POU2F1 | POU2F1 | POU2F1 |
|              |       |      |        |        | RB1    | RB1    | RB1    |
|              |       |      |        |        | TP53   | TP53   | TP53   |
|              |       |      |        |        |        |        |        |
|              |       |      |        |        |        |        |        |
|              |       |      |        |        |        |        |        |
|              |       |      |        |        |        |        |        |
| <b>Genes</b> | DNMT1 |      | FBN1   | COL1A1 | FAS    | FAS    | FAS    |
|              | ZEB1  |      | FMR1   | DACT3  | COL1A1 | COL1A1 | COL1A1 |
|              |       |      | SIGIRR |        | IL6    | IL6    | IL6    |
|              |       |      |        |        | MAPK8  | MAPK8  | MAPK8  |
|              |       |      |        |        | UTRN   | UTRN   | UTRN   |
|              |       |      |        |        |        |        |        |
|              |       |      |        |        |        |        |        |
|              |       |      |        |        |        |        |        |
|              |       |      |        |        |        |        |        |
|              |       |      |        |        |        |        |        |
|              |       |      |        |        |        |        |        |

**Validated targets  
of miRNAs**

|              |       |       |       |         |       |         |     |
|--------------|-------|-------|-------|---------|-------|---------|-----|
| <b>TFs</b>   | FOSL2 | SNAI2 | PARP1 | HDAC1   | E2F1  | CTCF    | MYC |
|              | E2F1  | FOXM1 | HDAC1 | HDGF    | EZH2  | E2F3    |     |
|              |       |       | STAT3 | KAT2B   | MYC   | EZH2    |     |
|              |       |       | E2F3  | MYBL2   | NFKB1 | MYC     |     |
|              |       |       |       | NFKB1   | PARP1 | SOX9    |     |
|              |       |       |       | STAT3   | SP1   | SP1     |     |
|              |       |       |       | HDAC2   | STAT3 |         |     |
|              |       |       |       | KLF4    |       |         |     |
|              |       |       |       | IKZF1   |       |         |     |
|              |       |       |       |         |       |         |     |
|              |       |       |       |         |       |         |     |
| <b>Genes</b> | DNMT1 | SNAI2 |       | ATM     | MYC   | BIRC5   | MYC |
|              | E2F1  |       |       | CCNB1   | HRAS  | CCNB1   | FN1 |
|              |       |       |       | EPB41L3 | E2F1  | EPB41L3 |     |
|              |       |       |       | FLNA    | IL6   | FLNA    |     |
|              |       |       |       | HMGCS1  |       | HIF1A   |     |
|              |       |       |       | SMAD4   |       | HMGCS1  |     |
|              |       |       |       | TGFB2   |       | MYC     |     |
|              |       |       |       | TYMP    |       | UTRN    |     |
|              |       |       |       | MAPK8   |       | HRAS    |     |
|              |       |       |       | DNMT1   |       |         |     |







|        |             |             |         |            |          |         |           |
|--------|-------------|-------------|---------|------------|----------|---------|-----------|
| miRNAs | miR-181d-3p | miR-181d-5p | miR-18a | miR-194-5p | miR-196a | miR-19a | miR-19b-1 |
|--------|-------------|-------------|---------|------------|----------|---------|-----------|

**Predicted targets  
of miRNAs**

|              |  |         |        |      |        |      |  |
|--------------|--|---------|--------|------|--------|------|--|
| <b>TFs</b>   |  | RUNX1   | RUNX1  | E2F3 | ERG    |      |  |
|              |  | KLF6    | KLF6   | FLI1 | FLI1   |      |  |
|              |  | ETS1    | NR3C1  | SP3  |        |      |  |
|              |  | NR3C1   | POU2F1 |      |        |      |  |
|              |  | KAT2B   |        |      |        |      |  |
|              |  |         |        |      |        |      |  |
|              |  |         |        |      |        |      |  |
|              |  |         |        |      |        |      |  |
| <b>Genes</b> |  | ATM     | ATM    | ACP5 | FAS    | FMR1 |  |
|              |  | SOS1    | CTGF   | FMR1 | COL1A1 | IL18 |  |
|              |  | VCAM1   | HIF1A  | SP3  | MAPK8  |      |  |
|              |  | EPB41L3 | HMGCS1 | RSF1 | ZEB1   |      |  |
|              |  |         | MAPK8  |      |        |      |  |
|              |  |         |        |      |        |      |  |
|              |  |         |        |      |        |      |  |
|              |  |         |        |      |        |      |  |
|              |  |         |        |      |        |      |  |
|              |  |         |        |      |        |      |  |
|              |  |         |        |      |        |      |  |

**Validated targets  
of miRNAs**

|              |  |      |        |       |        |        |        |
|--------------|--|------|--------|-------|--------|--------|--------|
| <b>TFs</b>   |  |      | NR3C1  | FOXM1 | FOXO1  | KAT2B  | KAT2B  |
|              |  |      | RUNX1  |       |        |        | NR3C1  |
|              |  |      |        |       |        |        |        |
|              |  |      |        |       |        |        |        |
|              |  |      |        |       |        |        |        |
|              |  |      |        |       |        |        |        |
|              |  |      |        |       |        |        |        |
|              |  |      |        |       |        |        |        |
|              |  |      |        |       |        |        |        |
|              |  |      |        |       |        |        |        |
| <b>Genes</b> |  | HRAS | CTGF   |       | FLNA   | CTGF   | CTGF   |
|              |  |      | EDF1   |       | TGFBR2 | SMAD4  | FMR1   |
|              |  |      | ATM    |       |        | TGFBR2 | ATM    |
|              |  |      | HIF1A  |       |        | DNMT1  | HMGCS1 |
|              |  |      | HMGCS1 |       |        |        | SMAD4  |
|              |  |      | SMAD4  |       |        |        | TGFBR2 |
|              |  |      | TGFBR2 |       |        |        | DNMT1  |
|              |  |      | DNMT1  |       |        |        |        |
|              |  |      |        |       |        |        |        |
|              |  |      |        |       |        |        |        |

|        |          |          |         |        |         |         |            |
|--------|----------|----------|---------|--------|---------|---------|------------|
| miRNAs | miR-200b | miR-200c | miR-20a | miR-22 | miR-29a | miR-29b | miR-342-3p |
|--------|----------|----------|---------|--------|---------|---------|------------|

**Predicted targets  
of miRNAs**

|              |       |  |        |        |       |       |       |
|--------------|-------|--|--------|--------|-------|-------|-------|
| <b>TFs</b>   | KLF6  |  | E2F1   | FOXO1  | ETS1  | MYBL2 | E2F3  |
|              | SP3   |  | E2F3   | HNRNPK | KAT2B |       |       |
|              |       |  | EZH2   |        |       |       |       |
|              |       |  | PPARA  |        |       |       |       |
|              |       |  | RB1    |        |       |       |       |
|              |       |  | STAT3  |        |       |       |       |
|              |       |  | KAT2B  |        |       |       |       |
|              |       |  |        |        |       |       |       |
| <b>Genes</b> | NCF2  |  | CALD1  | CD68   |       | DNMT1 | DNMT1 |
|              | MAPK8 |  | CCNG2  | SOS1   |       | FBN1  | ZEB1  |
|              | SP3   |  | E2F1   | UTRN   |       | EDF1  |       |
|              |       |  | HIF1A  | VCAM1  |       |       |       |
|              |       |  | SMAD4  | WRN    |       |       |       |
|              |       |  | MMP2   |        |       |       |       |
|              |       |  | MAPK8  |        |       |       |       |
|              |       |  | SOS1   |        |       |       |       |
|              |       |  | TGFBR2 |        |       |       |       |
|              |       |  | KLF11  |        |       |       |       |
|              |       |  | TXNIP  |        |       |       |       |

**Validated targets  
of miRNAs**

|              |       |        |        |       |       |        |       |
|--------------|-------|--------|--------|-------|-------|--------|-------|
| <b>TFs</b>   | E2F3  | MYB    | E2F1   | PPARA | KLF4  | SP1    | FOSL2 |
|              | ETS1  | ETS1   | E2F3   |       | AHR   | STAT3  | E2F1  |
|              | MYB   | SP1    | MYC    |       | MYC   | SP1    |       |
|              | SP1   | E2F3   | RB1    |       |       | STAT3  |       |
|              | EZH2  | FOXO1  | RUNX1  |       |       | MYC    |       |
|              |       | E2F3   | STAT3  |       |       |        |       |
|              |       |        |        |       |       |        |       |
|              |       |        |        |       |       |        |       |
|              |       |        |        |       |       |        |       |
|              |       |        |        |       |       |        |       |
| <b>Genes</b> | CREB1 | FLNA   | CCNB1  | HIF1A | MMP2  | COL1A1 | DNMT1 |
|              | FN1   | FN1    | E2F1   |       | DNMT1 | DNMT1  | E2F1  |
|              | KLF11 | KLF11  | FLNA   |       | FBN1  | MMP2   |       |
|              | ZEB1  | ZEB1   | HIF1A  |       | MYC   | FBN1   |       |
|              | DNMT1 | NCAM1  | MYC    |       |       | MYC    |       |
|              |       | CYP1B1 | SMAD4  |       |       |        |       |
|              |       |        | TGFBR2 |       |       |        |       |
|              |       |        | DNMT1  |       |       |        |       |
|              |       |        |        |       |       |        |       |
|              |       |        |        |       |       |        |       |



### H19-NFYB-SP3

|        |          |             |            |         |         |            |            |
|--------|----------|-------------|------------|---------|---------|------------|------------|
| miRNAs | miR-106a | miR-130b-3p | miR-138-5p | miR-139 | miR-141 | miR-152-3p | miR-152-5p |
|--------|----------|-------------|------------|---------|---------|------------|------------|

#### Predicted targets of miRNAs

|              |        |        |        |       |        |       |       |
|--------------|--------|--------|--------|-------|--------|-------|-------|
| <b>TFs</b>   | RUNX1  | FOSL2  | EZH2   | ETS1  | CREBBP | KLF6  | KLF6  |
|              | E2F1   | MYB    | POU2F1 |       | POU2F1 | KLF4  | E2F3  |
|              | PPARA  | STAT3  | RELA   |       |        |       | KLF4  |
|              | RB1    |        | SP1    |       |        |       |       |
|              | SP1    |        |        |       |        |       |       |
|              | STAT3  |        |        |       |        |       |       |
|              | KAT2B  |        |        |       |        |       |       |
|              |        |        |        |       |        |       |       |
| <b>Genes</b> | CALD1  | FMR1   | HIF1A  | FMR1  | FMR1   | CHUK  | DNMT1 |
|              | CCNG2  | MET    | KLF11  | MAPK8 |        | DNMT1 | FBN1  |
|              | E2F1   | TGFBR2 |        | ZEB1  |        | FBN1  | FMR1  |
|              | HIF1A  |        |        |       |        | FMR1  | SOS1  |
|              | SMAD4  |        |        |       |        | SOS1  |       |
|              | MMP2   |        |        |       |        |       |       |
|              | MAPK8  |        |        |       |        |       |       |
|              | SOS1   |        |        |       |        |       |       |
|              | TGFBR2 |        |        |       |        |       |       |
|              | KLF11  |        |        |       |        |       |       |
|              | TXNIP  |        |        |       |        |       |       |

#### targets of miRNAs

|              |        |        |        |       |       |        |  |
|--------------|--------|--------|--------|-------|-------|--------|--|
| <b>TFs</b>   | E2F1   | AHR    | EZH2   | NFKB1 | E2F3  | KLF4   |  |
|              | MYB    | E2F1   | NFKB1  |       | PPARA |        |  |
|              | RB1    | NR3C1  | SNAI2  |       | HDGF  |        |  |
|              | RUNX1  | PPARA  | SOX9   |       |       |        |  |
|              | STAT3  | RB1    | TWIST2 |       |       |        |  |
|              |        | STAT3  |        |       |       |        |  |
|              |        |        |        |       |       |        |  |
|              |        |        |        |       |       |        |  |
|              |        |        |        |       |       |        |  |
|              |        |        |        |       |       |        |  |
|              |        |        |        |       |       |        |  |
| <b>Genes</b> | E2F1   | E2F1   | HIF1A  | HRAS  | ZEB1  | DNMT1  |  |
|              | FAS    | KLF11  | SNAI2  | MET   | EIF4E | ADAM17 |  |
|              | TGFBR2 | SMAD4  |        |       | KLF11 |        |  |
|              | ATM    | TGFBR2 |        |       | ZEB1  |        |  |
|              | HIF1A  | ZEB1   |        |       |       |        |  |
|              |        | FMR1   |        |       |       |        |  |
|              |        | MMP2   |        |       |       |        |  |
|              |        |        |        |       |       |        |  |
|              |        |        |        |       |       |        |  |
|              |        |        |        |       |       |        |  |

|        |        |             |             |         |            |          |         |
|--------|--------|-------------|-------------|---------|------------|----------|---------|
| miRNAs | miR-17 | miR-181d-3p | miR-181d-5p | miR-18a | miR-194-5p | miR-196a | miR-19a |
|--------|--------|-------------|-------------|---------|------------|----------|---------|

**Predicted targets  
of miRNAs**

|              |        |  |         |        |      |        |      |
|--------------|--------|--|---------|--------|------|--------|------|
| <b>TFs</b>   | RUNX1  |  | RUNX1   | RUNX1  | E2F3 | ERG    |      |
|              | E2F1   |  | KLF6    | KLF6   | FLI1 | FLI1   |      |
|              | RB1    |  | ETS1    | NR3C1  | SP3  |        |      |
|              | STAT3  |  | NR3C1   | POU2F1 |      |        |      |
|              | KAT2B  |  | KAT2B   |        |      |        |      |
|              |        |  |         |        |      |        |      |
|              |        |  |         |        |      |        |      |
|              |        |  |         |        |      |        |      |
| <b>Genes</b> | CALD1  |  | ATM     | ATM    | ACP5 | FAS    | FMR1 |
|              | CCNG2  |  | SOS1    | CTGF   | FMR1 | COL1A1 | IL18 |
|              | E2F1   |  | VCAM1   | HIF1A  | SP3  | MAPK8  |      |
|              | HIF1A  |  | EPB41L3 | HMGCS1 | RSF1 | ZEB1   |      |
|              | MMP2   |  |         | MAPK8  |      |        |      |
|              | SOS1   |  |         |        |      |        |      |
|              | TGFBR2 |  |         |        |      |        |      |
|              | KLF11  |  |         |        |      |        |      |
|              | TXNIP  |  |         |        |      |        |      |
|              |        |  |         |        |      |        |      |
|              |        |  |         |        |      |        |      |

**targets of  
miRNAs**

|              |        |  |      |        |       |        |        |
|--------------|--------|--|------|--------|-------|--------|--------|
| <b>TFs</b>   | E2F1   |  |      | NR3C1  | FOXM1 | FOXO1  | KAT2B  |
|              | E2F3   |  |      | RUNX1  |       |        |        |
|              | KAT2B  |  |      |        |       |        |        |
|              | MYC    |  |      |        |       |        |        |
|              | RB1    |  |      |        |       |        |        |
|              | RUNX1  |  |      |        |       |        |        |
|              | STAT3  |  |      |        |       |        |        |
|              |        |  |      |        |       |        |        |
|              |        |  |      |        |       |        |        |
|              |        |  |      |        |       |        |        |
| <b>Genes</b> | E2F1   |  | HRAS | CTGF   |       | FLNA   | CTGF   |
|              | MMP2   |  |      | EDF1   |       | TGFBR2 | SMAD4  |
|              | MYC    |  |      | ATM    |       |        | TGFBR2 |
|              | SMAD4  |  |      | HIF1A  |       |        | DNMT1  |
|              | TGFBR2 |  |      | HMGCS1 |       |        |        |
|              | HIF1A  |  |      | SMAD4  |       |        |        |
|              | DNMT1  |  |      | TGFBR2 |       |        |        |
|              | IGFBP3 |  |      | DNMT1  |       |        |        |
|              |        |  |      |        |       |        |        |
|              |        |  |      |        |       |        |        |

|        |           |          |          |         |        |         |         |
|--------|-----------|----------|----------|---------|--------|---------|---------|
| miRNAs | miR-19b-1 | miR-200b | miR-200c | miR-20a | miR-22 | miR-29a | miR-29b |
|--------|-----------|----------|----------|---------|--------|---------|---------|

**Predicted targets  
of miRNAs**

|              |  |       |  |        |        |       |       |
|--------------|--|-------|--|--------|--------|-------|-------|
| <b>TFs</b>   |  | KLF6  |  | E2F1   | FOXO1  | ETS1  | MYBL2 |
|              |  | SP3   |  | E2F3   | HNRNPK | KAT2B |       |
|              |  |       |  | EZH2   |        |       |       |
|              |  |       |  | PPARA  |        |       |       |
|              |  |       |  | RB1    |        |       |       |
|              |  |       |  | STAT3  |        |       |       |
|              |  |       |  | KAT2B  |        |       |       |
|              |  |       |  |        |        |       |       |
| <b>Genes</b> |  | NCF2  |  | CALD1  | CD68   |       | DNMT1 |
|              |  | MAPK8 |  | CCNG2  | SOS1   |       | FBN1  |
|              |  | SP3   |  | E2F1   | UTRN   |       | EDF1  |
|              |  |       |  | HIF1A  | VCAM1  |       |       |
|              |  |       |  | SMAD4  | WRN    |       |       |
|              |  |       |  | MMP2   |        |       |       |
|              |  |       |  | MAPK8  |        |       |       |
|              |  |       |  | SOS1   |        |       |       |
|              |  |       |  | TGFBR2 |        |       |       |
|              |  |       |  | KLF11  |        |       |       |
|              |  |       |  | TXNIP  |        |       |       |

**targets of  
miRNAs**

|              |        |       |        |        |       |       |        |
|--------------|--------|-------|--------|--------|-------|-------|--------|
| <b>TFs</b>   | KAT2B  | E2F3  | MYB    | E2F1   | PPARA | KLF4  | SP1    |
|              | NR3C1  | ETS1  | ETS1   | E2F3   |       | AHR   | STAT3  |
|              |        | MYB   | SP1    | MYC    |       | MYC   | SP1    |
|              |        | SP1   | E2F3   | RB1    |       |       | STAT3  |
|              |        | EZH2  | FOXO1  | RUNX1  |       |       | MYC    |
|              |        |       | E2F3   | STAT3  |       |       |        |
|              |        |       |        |        |       |       |        |
|              |        |       |        |        |       |       |        |
|              |        |       |        |        |       |       |        |
|              |        |       |        |        |       |       |        |
| <b>Genes</b> | CTGF   | CREB1 | FLNA   | CCNB1  | HIF1A | MMP2  | COL1A1 |
|              | FMR1   | FN1   | FN1    | E2F1   |       | DNMT1 | DNMT1  |
|              | ATM    | KLF11 | KLF11  | FLNA   |       | FBN1  | MMP2   |
|              | HMGCS1 | ZEB1  | ZEB1   | HIF1A  |       | MYC   | FBN1   |
|              | SMAD4  | DNMT1 | NCAM1  | MYC    |       |       | MYC    |
|              | TGFBR2 |       | CYP1B1 | SMAD4  |       |       |        |
|              | DNMT1  |       |        | TGFBR2 |       |       |        |
|              |        |       |        | DNMT1  |       |       |        |
|              |        |       |        |        |       |       |        |
|              |        |       |        |        |       |       |        |







**Table S6.** Primers for qRT-PCR experiment

| <b>Gene</b>   | <b>Forward sequence</b>       | <b>Reverse sequence</b>      |
|---------------|-------------------------------|------------------------------|
| <i>GAPDH</i>  | 5'-CCACTCCTCCACCTTTGAC-3'     | 5'-ACCCTGTTGCTGTAGCCA-3'     |
| <i>H19</i>    | 5'-GTGGACTTGGTGACGCTGTA-3'    | 5'-CACCATCCTCCCTCCTGAGA-3'   |
| <i>SP1</i>    | 5'-TGGCAGCAGTACCAATGGC-3'     | 5'-CCAGGTAGTCCTGTCAGAACTT-3' |
| <i>ETS1</i>   | 5'-GATAGTTGTGATCGCCTCACC-3'   | 5'-GTCCTCTGAGTCGAAGCTGTC-3'  |
| <i>STAT3</i>  | 5'-ACCAGCAGTATAGCCGCTTC-3'    | 5'-GCCACAATCCGGGCAATCT-3'    |
| <i>TGFBR2</i> | 5'-GTAGCTCTGATGAGTGCAATGAC-3' | 5'-CAGATATGGCAACTCCCAGTG-3'  |
| <i>KLF11</i>  | 5'-GTTGCGGATAAGACCCCTCAC-3'   | 5'-TGGAATCTGTTACTTGGGGAGA-3' |
